# Supplementary material for: Deciphering spatial domains from spatially resolved transcriptomics with Siamese graph autoencoder
Source: PubMed Central journal article supplement (PMC10939418; doi:10.1093/gigascience/giae003), 2024-02-20
Supplement: giae003_giga-d-23-00329_original_submission.pdf [file giae003_giga-d-23-00329_original_submission.pdf]

# GigaScience

## Deciphering spatial domains from spatially resolved transcriptomics with Siamese Graph Autoencoder --Manuscript Draft--

|                                                      |                                                                                                                                                                                                                                                                                                                                                                                                                                                                                                                                                                                                                                                                                                                                                                                                                                                                                                                                                                                                                                                                                                                                                                                                                                                                                                                                                                                                                                                                                                                                                                                                                                                                                                                                                                                                                                                                                                                             |                     |
|------------------------------------------------------|-----------------------------------------------------------------------------------------------------------------------------------------------------------------------------------------------------------------------------------------------------------------------------------------------------------------------------------------------------------------------------------------------------------------------------------------------------------------------------------------------------------------------------------------------------------------------------------------------------------------------------------------------------------------------------------------------------------------------------------------------------------------------------------------------------------------------------------------------------------------------------------------------------------------------------------------------------------------------------------------------------------------------------------------------------------------------------------------------------------------------------------------------------------------------------------------------------------------------------------------------------------------------------------------------------------------------------------------------------------------------------------------------------------------------------------------------------------------------------------------------------------------------------------------------------------------------------------------------------------------------------------------------------------------------------------------------------------------------------------------------------------------------------------------------------------------------------------------------------------------------------------------------------------------------------|---------------------|
| <b>Manuscript Number:</b>                            | GIGA-D-23-00329                                                                                                                                                                                                                                                                                                                                                                                                                                                                                                                                                                                                                                                                                                                                                                                                                                                                                                                                                                                                                                                                                                                                                                                                                                                                                                                                                                                                                                                                                                                                                                                                                                                                                                                                                                                                                                                                                                             |                     |
| <b>Full Title:</b>                                   | Deciphering spatial domains from spatially resolved transcriptomics with Siamese Graph Autoencoder                                                                                                                                                                                                                                                                                                                                                                                                                                                                                                                                                                                                                                                                                                                                                                                                                                                                                                                                                                                                                                                                                                                                                                                                                                                                                                                                                                                                                                                                                                                                                                                                                                                                                                                                                                                                                          |                     |
| <b>Article Type:</b>                                 | Technical Note                                                                                                                                                                                                                                                                                                                                                                                                                                                                                                                                                                                                                                                                                                                                                                                                                                                                                                                                                                                                                                                                                                                                                                                                                                                                                                                                                                                                                                                                                                                                                                                                                                                                                                                                                                                                                                                                                                              |                     |
| <b>Funding Information:</b>                          | National Natural Science Foundation of China (32300526)                                                                                                                                                                                                                                                                                                                                                                                                                                                                                                                                                                                                                                                                                                                                                                                                                                                                                                                                                                                                                                                                                                                                                                                                                                                                                                                                                                                                                                                                                                                                                                                                                                                                                                                                                                                                                                                                     | Dr. Shuangfang Fang |
|                                                      | National Key R&D Program of China (2022YFC3400400)                                                                                                                                                                                                                                                                                                                                                                                                                                                                                                                                                                                                                                                                                                                                                                                                                                                                                                                                                                                                                                                                                                                                                                                                                                                                                                                                                                                                                                                                                                                                                                                                                                                                                                                                                                                                                                                                          | Pro. Xun Xu         |
| <b>Abstract:</b>                                     | <p><b>Background</b></p> <p>Cell clustering is a pivotal aspect of spatial transcriptomics (ST) data analysis as it forms the foundation for subsequent data mining. Recent advances in spatial domain identification have leveraged Graph Neural Network approaches in conjunction with spatial transcriptomics data. However, such GNN-based methods suffer from representation collapse, wherein all spatial spots are projected onto a singular representation. Consequently, the discriminative capability of individual representation feature is limited, leading to suboptimal clustering performance.</p> <p><b>Results</b></p> <p>To address this issue, we proposed SGAE, a novel framework for spatial domain identification, incorporating the power of Siamese Graph Autoencoder. SGAE mitigates the information correlation at the both sample and feature level, thus improving the representation discrimination. We adapted this framework to ST analysis by constructing a graph based on both gene expression and spatial information. SGAE outperformed alternative methods by its effectiveness in capturing spatial patterns and generating high-quality clusters, as evaluated by ARI, FMI, and NMI. Moreover, the clustering results derived from SGAE can be further utilized in the identification of 3D Drosophila embryonic structure with enhanced accuracy.</p> <p><b>Conclusions</b></p> <p>Benchmarking results from various ST datasets generated by diverse platforms demonstrate compelling evidence for the effectiveness of SGAE against other ST clustering methods. Specifically, SGAE exhibits potential for extension and application on multi-slice 3D reconstruction and tissue structure investigation. The source code and a collection of spatial clustering results can be accessed at <a href="https://github.com/STOmics/SGAE/">https://github.com/STOmics/SGAE/</a>.</p> |                     |
| <b>Corresponding Author:</b>                         | Shuangfang Fang<br>BGI Group<br>BeiJing, CHINA                                                                                                                                                                                                                                                                                                                                                                                                                                                                                                                                                                                                                                                                                                                                                                                                                                                                                                                                                                                                                                                                                                                                                                                                                                                                                                                                                                                                                                                                                                                                                                                                                                                                                                                                                                                                                                                                              |                     |
| <b>Corresponding Author Secondary Information:</b>   |                                                                                                                                                                                                                                                                                                                                                                                                                                                                                                                                                                                                                                                                                                                                                                                                                                                                                                                                                                                                                                                                                                                                                                                                                                                                                                                                                                                                                                                                                                                                                                                                                                                                                                                                                                                                                                                                                                                             |                     |
| <b>Corresponding Author's Institution:</b>           | BGI Group                                                                                                                                                                                                                                                                                                                                                                                                                                                                                                                                                                                                                                                                                                                                                                                                                                                                                                                                                                                                                                                                                                                                                                                                                                                                                                                                                                                                                                                                                                                                                                                                                                                                                                                                                                                                                                                                                                                   |                     |
| <b>Corresponding Author's Secondary Institution:</b> |                                                                                                                                                                                                                                                                                                                                                                                                                                                                                                                                                                                                                                                                                                                                                                                                                                                                                                                                                                                                                                                                                                                                                                                                                                                                                                                                                                                                                                                                                                                                                                                                                                                                                                                                                                                                                                                                                                                             |                     |
| <b>First Author:</b>                                 | Shuangfang Fang                                                                                                                                                                                                                                                                                                                                                                                                                                                                                                                                                                                                                                                                                                                                                                                                                                                                                                                                                                                                                                                                                                                                                                                                                                                                                                                                                                                                                                                                                                                                                                                                                                                                                                                                                                                                                                                                                                             |                     |
| <b>First Author Secondary Information:</b>           |                                                                                                                                                                                                                                                                                                                                                                                                                                                                                                                                                                                                                                                                                                                                                                                                                                                                                                                                                                                                                                                                                                                                                                                                                                                                                                                                                                                                                                                                                                                                                                                                                                                                                                                                                                                                                                                                                                                             |                     |
| <b>Order of Authors:</b>                             | Shuangfang Fang                                                                                                                                                                                                                                                                                                                                                                                                                                                                                                                                                                                                                                                                                                                                                                                                                                                                                                                                                                                                                                                                                                                                                                                                                                                                                                                                                                                                                                                                                                                                                                                                                                                                                                                                                                                                                                                                                                             |                     |

|                                                                                                                                                                                                                                                                                                                                                                                                                              |                 |
|------------------------------------------------------------------------------------------------------------------------------------------------------------------------------------------------------------------------------------------------------------------------------------------------------------------------------------------------------------------------------------------------------------------------------|-----------------|
|                                                                                                                                                                                                                                                                                                                                                                                                                              | Lei Cao         |
|                                                                                                                                                                                                                                                                                                                                                                                                                              | Chao Yang       |
|                                                                                                                                                                                                                                                                                                                                                                                                                              | Luni Hu         |
|                                                                                                                                                                                                                                                                                                                                                                                                                              | Wenjian Jiang   |
|                                                                                                                                                                                                                                                                                                                                                                                                                              | Yating Ren      |
|                                                                                                                                                                                                                                                                                                                                                                                                                              | Tianyi Xia      |
|                                                                                                                                                                                                                                                                                                                                                                                                                              | Mengyang Xu     |
|                                                                                                                                                                                                                                                                                                                                                                                                                              | Yishuai Ji      |
|                                                                                                                                                                                                                                                                                                                                                                                                                              | Mei Li          |
|                                                                                                                                                                                                                                                                                                                                                                                                                              | Xun Xu          |
|                                                                                                                                                                                                                                                                                                                                                                                                                              | Yuxiang Li      |
|                                                                                                                                                                                                                                                                                                                                                                                                                              | Yong Zhang      |
| <b>Order of Authors Secondary Information:</b>                                                                                                                                                                                                                                                                                                                                                                               |                 |
| <b>Additional Information:</b>                                                                                                                                                                                                                                                                                                                                                                                               |                 |
| <b>Question</b>                                                                                                                                                                                                                                                                                                                                                                                                              | <b>Response</b> |
| Are you submitting this manuscript to a special series or article collection?                                                                                                                                                                                                                                                                                                                                                | No              |
| <b>Experimental design and statistics</b><br><br>Full details of the experimental design and statistical methods used should be given in the Methods section, as detailed in our <a href="#">Minimum Standards Reporting Checklist</a> . Information essential to interpreting the data presented should be made available in the figure legends.<br><br>Have you included all the information requested in your manuscript? | Yes             |
| <b>Resources</b><br><br>A description of all resources used, including antibodies, cell lines, animals and software tools, with enough information to allow them to be uniquely identified, should be included in the Methods section. Authors are strongly encouraged to cite <a href="#">Research Resource Identifiers</a> (RRIDs) for antibodies, model organisms and tools, where possible.                              | Yes             |

|                                                                                                                                                                                                                                                                                                                                                                                                                                                                                                                                                         |            |
|---------------------------------------------------------------------------------------------------------------------------------------------------------------------------------------------------------------------------------------------------------------------------------------------------------------------------------------------------------------------------------------------------------------------------------------------------------------------------------------------------------------------------------------------------------|------------|
| <p>Have you included the information requested as detailed in our <a href="#">Minimum Standards Reporting Checklist</a>?</p>                                                                                                                                                                                                                                                                                                                                                                                                                            |            |
| <p><b>Availability of data and materials</b></p> <p>All datasets and code on which the conclusions of the paper rely must be either included in your submission or deposited in <a href="#">publicly available repositories</a> (where available and ethically appropriate), referencing such data using a unique identifier in the references and in the “Availability of Data and Materials” section of your manuscript.</p> <p>Have you have met the above requirement as detailed in our <a href="#">Minimum Standards Reporting Checklist</a>?</p> | <p>Yes</p> |

1        **Deciphering spatial domains from spatially resolved transcriptomics**  
2                                    **with Siamese Graph Autoencoder**

3            Lei Cao<sup>1,2†</sup>, Chao Yang<sup>1,2†</sup>, Luni Hu<sup>1,2†</sup>, Wenjian Jiang<sup>1,2,‡</sup>, Yating Ren<sup>3</sup>, Tianyi Xia<sup>1,2</sup>,  
4    Mengyang Xu<sup>2,4</sup>, Yishuai Ji<sup>5</sup>, Mei Li<sup>2</sup>, Xun Xu<sup>6</sup>, Yuxiang Li<sup>2,6,7</sup>, Yong Zhang<sup>2,6,7\*</sup>, Shuangsang  
5                                    Fang<sup>1,2\*</sup>

6  
7    1 BGI Research, Beijing 102601, China.

8    2 BGI Research, Shenzhen 518083, China.

9    3 School of Software, Beihang University.

10    4 BGI Research, Qingdao 266555, China.

11    5 BGI, Tianjin 300308, China.

12    6 BGI Research, Wuhan 430074, China.

13    7 Guangdong Bigdata Engineering Technology Research Center for Life Sciences, BGI research,  
14    Shenzhen 518083, China.

15  
16    \* Corresponding: [fangshuangsang@genomics.cn](mailto:fangshuangsang@genomics.cn), [zhangyong2@stomics.tech](mailto:zhangyong2@stomics.tech)

17    † These authors contributed equally as the first authors.

18    ‡ Senior author.

19

20 **Abstract**

21 **Background**

22 Cell clustering is a pivotal aspect of spatial transcriptomics (ST) data analysis as it forms the  
23 foundation for subsequent data mining. Recent advances in spatial domain identification have  
24 leveraged Graph Neural Network approaches in conjunction with spatial transcriptomics data.  
25 However, such GNN-based methods suffer from representation collapse, wherein all spatial spots  
26 are projected onto a singular representation. Consequently, the discriminative capability of  
27 individual representation feature is limited, leading to suboptimal clustering performance.

28 **Results**

29 To address this issue, we proposed SGAE, a novel framework for spatial domain identification,  
30 incorporating the power of Siamese Graph Autoencoder. SGAE mitigates the information  
31 correlation at both sample and feature level, thus improving the representation discrimination. We  
32 adapted this framework to ST analysis by constructing a graph based on both gene expression and  
33 spatial information. SGAE outperformed alternative methods by its effectiveness in capturing  
34 spatial patterns and generating high-quality clusters, as evaluated by ARI, FMI, and NMI.  
35 Moreover, the clustering results derived from SGAE can be further utilized in the identification of  
36 3D Drosophila embryonic structure with enhanced accuracy.

37 **Conclusions**

38 Benchmarking results from various ST datasets generated by diverse platforms demonstrate  
39 compelling evidence for the effectiveness of SGAE against other ST clustering methods.  
40 Specifically, SGAE exhibits potential for extension and application on multi-slice 3D  
41 reconstruction and tissue structure investigation. The source code and a collection of spatial  
42 clustering results can be accessed at <https://github.com/STOmics/SGAE/>.

43

44 **Keywords:** Spatial transcriptomics; Spatial clustering; Graph neural networks

45

## 46 **Background**

47 Spatial transcriptomics (ST) represents a newly emerging technology that revolutionizes the  
48 comprehensive characterization of tissue organization and architecture[1, 2]. By profiling the  
49 spatially-resolved gene expression patterns, ST technologies allow scientists to delve into the  
50 intricate cellular dynamics within tissues. Based on the underlying methodology, these techniques  
51 can be categorized into two main categories: (1) imaging-based methods (MERFISH[3] and  
52 seqFISH[4]), and (2) sequencing-based methods (Slide-seq[5] and 10x Visium[6]). As the need  
53 for higher-resolution analysis to unravel cellular diversity becomes imperative, advancements  
54 such as Stereo-seq[7] have been developed to provide improved resolution over the years. The  
55 advent of ST technologies holds immense potential to drive biological discoveries in development,  
56 physiology and a broad range of diseases[8, 9].

57

58 In parallel with single-cell RNA sequencing (scRNA-Seq) analysis, clustering serves as the initial  
59 step in ST data analysis, grouping individual cells based on their gene expression patterns.

60 Similarly, the primary objective for ST data analysis revolves around dissecting tissue into distinct  
61 spatial domains. While traditional machine learning approaches have been applied to tackle this  
62 task, recent studies have sought to apply deep learning frameworks to learn how to classify spatial  
63 spots into specific regions[10-13]. For instance, SpaGCN[12] identifies spatial domains through a  
64 graph convolutional network (GCN) framework, while STAGATE[13] deploys a graph attention  
65 autoencoder to define spatial clusters. However, such graph neural network (GNN) based methods  
66 usually suffer from representations collapse, which tends to map spatial spots into the same  
67 representation[14]. Consequently, the discriminative capability of spot representation is limited,  
68 leading to inaccurate identification of spatial domains.

69

70 To tackle the aforementioned challenge, we proposed SGAE, which aims to learn discriminative  
71 spot representation and accurately decipher spatial domains. This framework is derived from the  
72 Dual Correlation Reduction Network (DCRN)[14], which effectively reduces information  
73 correlation at the dual level. SGAE adapts this architecture to ST data analysis by constructing a  
74 graph that incorporates both gene expression and spatial information. According to benchmarking  
75 assessments, SGAE outperforms existing algorithms in the task of domain identification with

76 superior performance. Moreover, SGAE can be extended in the realm of 3D tissue structure  
77 identification.

78

## 79 **Results**

### 80 **Overview of SGAE framework**

81 SGAE is an unsupervised algorithm for ST clustering that leverages a Variational Graph  
82 Autoencoder (VGAE)[15] within a Siamese graph neural network to combine gene expression and  
83 spatial information (Fig.1). To implement SGAE, the gene expression matrix ( $X$ ) and adjacency  
84 matrix ( $A$ ) are fed into the encoder, which maps the gene expression data into a lower-dimensional  
85 latent space, generating embedding vectors ( $Z$ ) for individual cells. Pseudo-label is firstly  
86 generated by pre-clustering based on gene expression patterns. SGAE adaptively learns the edge  
87 weights of the spatial neighbor network (SNN) to capture the similarity between neighboring spots  
88 and update the spot representation by aggregating information from neighbors. Finally, the latent  
89 embeddings can be visualized using Uniform Manifold Approximation and Projection (UMAP)  
90 and various clustering algorithms such as K-means and Louvain can be employed to identify  
91 spatial domains for subsequent analysis.

92

93 By calculating K-nearest neighbors (KNN) based on the relative spatial positioning of spots,  
94 SGAE can effectively capture the spatial relationships between cells. This is especially essential  
95 for spatial transcriptomics (ST) data with low spatial resolutions, such as 10x Visium, where  
96 discerning fine-grained spatial details can be challenging. Besides, SGAE introduces the concept  
97 of a cell type-aware SNN by pruning the SNN based on the pre-clustering of gene expressions.  
98 This preliminary clustering step aids in identifying regions that contain distinct cell types.  
99 Through the incorporation of cell type information during the graph construction process, SGAE  
100 adeptly captures data heterogeneity and improve the accuracy of the graph representation.

101

102 SGAE uses graph distortion to acquire diverse and informative node representations. This is  
103 achieved through the application of two types of perturbation: feature perturbation and graph  
104 perturbation. For feature perturbation, a random noise matrix is introduced to the feature matrix  
105 using the Hadamard product. On the other hand, graph perturbation involves edge removal and

106 graph diffusion within the Siamese architecture. To implement edge removal, a mask matrix is  
107 generated based on the cosine similarity matrix computed through pairwise comparisons in the  
108 latent space. The 10% of edges with the lowest values are then removed. Graph diffusion is  
109 facilitated using a random walk-based Personalized PageRank algorithm[16], allowing for the  
110 passage of messages through higher-order neighborhoods. To optimize the learning process,  
111 SGAE employs an objective function inspired by the Barlow Twins approach[17], aiming to  
112 minimize the deviation of the cross-correlation matrix from the ideal identity matrix and reduce  
113 redundant information among nodes in the latent space, therefore improving the overall accuracy  
114 of the learned embedding.

115

### 116 **SGAE exhibited remarkable effectiveness and robustness in spatial domain exploration**

117 ST datasets generated by different technology platforms possess distinct resolutions and features,  
118 making it essential to validate the clustering robustness of SGAE across these platforms. To  
119 achieve this, we included ST datasets generated by 10x Visium[18], seqFISH[19], MERFISH[20],  
120 and SLIDE-seq v2[21]. Then we comprehensively compare the clustering performance of SGAE  
121 against other state-of-the-art spatial clustering methods, including SpaGCN[12], GraphST[10],  
122 STAGATE[13] and Leiden[22]. Clustering performance was assessed by spatial visualization  
123 combined with Adjusted Rand Index (ARI), Normalized Mutual Information (NMI) and Fowlkes-  
124 Mallows Index (FMI).

125

### 126 **Human dorsolateral prefrontal cortex 10x Visium dataset**

127 We applied SGAE to analyze the 10x Visium ST dataset obtained from the human  
128 dorsolateral prefrontal cortex (DLPFC)[18]. The visualization of cell clustering confirmed  
129 that SGAE was able to discern the intricate stratified cortex structures with remarkable  
130 clarity, surpassing the capabilities of other existing methods (Fig. 2A). Furthermore, our  
131 benchmarking results revealed that SGAE outperformed other algorithms in analyzing all 12  
132 DLPFC slices (Fig. 2E).

133

### 134 **Mouse gastrulation seqFISH dataset**

135 The evaluation of SGAE's performance extends to the mouse gastrulation dataset, which was



136 generated through the imaging-based technology seqFISH[19]. The visualization of mouse  
137 gastrulation structures derived from different methods demonstrates higher effectiveness of SGAE  
138 in accurately discriminating embryo tissue sections (Fig. 2B). In contrast, STAGATE failed to  
139 decipher the spatial domain with precision, as it tends to divide the spatial domain into numerous  
140 disorder patches. Notably, SGAE reaffirmed its superiority in all benchmark metrics against  
141 other methods (Fig. 2F).

142

#### 143 **Mouse cortex MERFISH dataset**

144 Based on the MERFISH dataset of the mouse primary motor cortex[20], we further compare  
145 the clustering results obtained by different methods. While all five methods successfully  
146 extract the stratified structure of the cortex, SGAE demonstrates a remarkable ability to  
147 capture the layered organization of the glutamatergic structures more accurately when  
148 compared to the original annotation (Fig. 2C). Furthermore, SGAE achieved the highest  
149 performance among all five methods, underscoring its effectiveness in precisely clustering  
150 cells and capturing the spatial arrangement of the primary motor cortex (Fig 2G).

151

#### 152 **Mouse olfactory bulb SLIDE-seq v2 dataset**

153 The evaluation also encompasses the SLIDE-seq V2 dataset of the mouse olfactory bulb[21].  
154 The spatial domains identified by SGAE exhibited remarkable consistency with the annotation  
155 provided by the Allen Reference Atlas, strengthening the confidence in its accuracy and reliability  
156 (Fig. 2D). Conversely, the Leiden clustering approach failed to provide a cohesive tissue structure  
157 in this dataset, while SpaGCN, GraphST, and STAGATE partially deciphered certain structures  
158 within the olfactory bulb.

159

160 Overall, our results unequivocally establish SGAE as a powerful method for analyzing ST data,  
161 surpassing other state-of-the-art methods in terms of cell clustering performance and structure  
162 exploration of complex tissues.

163

#### 164 **SGAE deciphers spatial domains and provides discriminative representations**

165 Stereo-seq is a groundbreaking ST technology that offers subcellular resolution and has opened up

166 new avenues for investigating the intricate structures within complex tissues[7]. However, the  
167 exploitation of its high-resolution capabilities necessitates the utilization of advanced clustering  
168 and spatial analysis methods. Therefore, we conducted a meticulous evaluation of SGAE's  
169 clustering performance using a Stereo-seq dataset of the mouse adult brain dataset [23].  
170 Intriguingly, SGAE showcased exceptional discriminative power in accurately distinguishing  
171 mouse brain sections within this dataset, outperforming other methods such as SpaGCN,  
172 STAGATE, CCST, and GraphST (Fig. 3A). Subcluster analysis further demonstrated the superior  
173 performance of SGAE (Fig. 3B). SGAE accurately delineated distinct subpopulations within the  
174 tissue, whereas STAGATE inaccurately divided the DGGRC2 and TEGLU24 regions into two  
175 separate clusters, and SpaGCN assigned a larger region for TEGLU24 and HBGLU.

176

177 To provide a systematic comparison, we conducted an extensive evaluation of SGAE's clustering  
178 results using multiple benchmark metrics, including ARI, NMI, and FMI. Remarkably, SGAE  
179 outperformed all other existing methods across all benchmark metrics (Fig. 3C). Besides, we  
180 utilized Moran's Index (MI) to assess the spatial autocorrelation of each cluster. Although  
181 SpaGCN and STAGATE achieved higher MI scores, SGAE exhibited a distribution most closely  
182 aligned with the ground truth in terms of MI (Fig. 3D). It is suggested that SGAE effectively  
183 utilizes spatial information in a more reasonable and appropriate manner.

184

185 Furthermore, we evaluated the representative embedding provided by SGAE, CCST[11],  
186 STAGATE, and GraphST through UMAP visualization (Fig. 3E). The results showed that SGAE  
187 exhibited a remarkable proficiency in extracting the embedding of the mouse brain Stereo-seq  
188 data, while GraphST struggled to distinguish different cell groups. To further evaluate the  
189 capability of SGAE to characterize biological representation, we performed pseudotime analysis  
190 and calculated the F-score for each cell type (Fig. 3F). Surprisingly, SGAE achieved the highest F-  
191 score, highlighting the discriminative capability of SGAE's embedding in accurately  
192 distinguishing between different cell types.

193

194 Taken together, these findings provide compelling evidence that SGAE not only surpasses other  
195 methods in terms of clustering accuracy, but also excels in providing superior embedding

196 representation for the datasets.

197

### 198 **SGAE enhanced complex spatial domain dissection in 3D Drosophila**

199 The advanced use of ST clustering involves integrating 3D reconstruction technology to gain a  
200 comprehensive understanding of the spatial organization and gene expression patterns within  
201 complex tissues. The fundamental topic of 3D tissue structure dissection is to identify shared and  
202 specific spatial domains across multiple slices of ST datasets. Our investigation sought to  
203 determine whether SGAE could effectively accomplish this challenging multi-slice clustering  
204 task, especially for the datasets with less batch effect. Notably, we found that SGAE surpassed  
205 Leiden and STAligner[24] in accurately dissecting the spatial domains of Drosophila embryos at  
206 different stages (E14-16, E16-18 and L1)[25], as evidenced by its higher similarity to the ground  
207 truth (Fig4. A, B). These findings highlighted the effectiveness of SGAE in achieving reliable  
208 multi-slice clustering for ST analysis.

209

210 After obtaining the clustering results from SGAE, STAligner and Leiden, we proceeded with the  
211 crucial step of stack slice registration to enable 3D tissue reconstruction. This involved aligning  
212 consecutive tissue slices to generate a complete and accurate 3D representation of the tissue. We  
213 observed that the 3D meshes generated from SGAE results exhibited exceptional accuracy in  
214 dividing the tissue into correct structures, aligning perfectly with the corresponding marker genes  
215 (Fig. 4C). It indicated that the spatial domains generated by SGAE are highly effective in  
216 achieving promising 3D tissue reconstruction. In contrast, STAligner and Leiden faltered in  
217 accurately dividing the tissue into correct structures in certain cases. This suggests the robustness  
218 and reliability of the spatial domains generated by SGAE.

219

### 220 **Discussion**

221 Spatial transcriptomics is a cutting-edge technology that allows us to simultaneously capture gene  
222 expression while retain spatial information of the tissue. The emergence of large-scale ST data has  
223 increased the demand for effective algorithms capable of dissecting spatial domains. To achieve  
224 this, we proposed SGAE, a framework composed of two identical encoders based on a Siamese  
225 network, which enabled us to encode cell features. Additionally, SGAE employs a graph neural

226 network that facilitates the learning of informative representations of both gene expression and  
227 spatial locations. To fully leverage the spatial information provided by ST, we constructed a graph  
228 based on the spatial information of each cell and pre-clustered gene expression. We then used a  
229 linear combination operation to merge the decorrelated latent embeddings, enhancing the  
230 discriminative power of the resulting embedding and clustering accuracy, thus facilitating  
231 comprehensive analysis to provide profound insights into complex biological systems.

232

233 Our study demonstrates the effectiveness and robustness of SGAE in capturing tissue structures  
234 across different ST technology platforms. This superiority over other methods indicates the  
235 immense potential of SGAE as a reliable tool for analyzing ST datasets. Another notable strength  
236 of SGAE lies in its ability to accurately capture the heterogeneity present within ST datasets. The  
237 complexity and diversity of cell types within tissues pose significant challenges in accurately  
238 characterizing gene expression patterns. Notably, SGAE's embedding successfully captures the  
239 heterogenic information, enabling a more comprehensive understanding of the spatial organization  
240 of gene expression patterns within tissues. While SGAE has demonstrated its advantages in ST  
241 clustering, further validation across a wider range of ST datasets and biological systems is  
242 necessary to fully assess the generalizability of SGAE's performance.

243

244 In this study, we also applied SGAE to analyze the Drosophila 3D dataset and unravel the spatial  
245 domains during the E14-16, E16-18, and Larva L1 stages. We further compared the performance  
246 of SGAE with that of STAligner, a commonly used method developed for multi-slice ST analysis.  
247 By evaluating benchmark metrics, we consistently observed that SGAE outperformed STAligner  
248 in effectively grouping cells into biologically meaningful clusters. The superior clustering results  
249 of SGAE carry significant implications for the analysis of 3D tissue structure reconstruction. In  
250 conclusion, SGAE demonstrates its proficiency in spatial domain identification on spatial  
251 transcriptomics with moderate batch effect. For datasets with a high batch effect, it is  
252 recommended to integrate batch removal methods upstream of SGAE to effectively mitigate this  
253 issue. By accurately categorizing cells into reasonable groups, SGAE could contribute to a more  
254 precise characterization of the spatial organization of gene expression patterns. This is particularly  
255 important for understanding the complex processes underlying biological development and

256 differentiation.

257

## 258 **Methods**

### 259 **Notations and Problem Definition**

260 An undirected graph is usually represented by  $G = \{V, E\}$ , where  $V = \{v_1, v_2, \dots, v_N\}$  and

261  $E$  are the node and edge respectively. Each node  $v_i$  is characterized by a vector  $x_i \in \mathbb{R}^D$ ,

262 where  $D$  is the dimension of the attribute. Then the graph can be characterized by the feature

263 matrix  $X \in \mathbb{R}^{N \times D}$ . The relation between each node is characterized by the adjacency matrix

264  $A = (a_{ij})_{N \times N}$ , where  $a_{ij} = 1$  if  $v_i$  and  $v_j$  are connected by an edge, otherwise  $a_{ij} = 0$ .

265 A degree matrix describes the number of edges connected to each node and can be

266 expressed in a diagonal matrix  $D = \text{diag}(d_1, d_2, \dots, d_N) \in \mathbb{R}^{N \times N}$ ,  $d_i$  is the degree of

267 node  $v_i$  and calculated by  $d_i = \sum_{(v_i, v_j) \in E} a_{ij}$ . We normalize the adjacency matrix as  $\tilde{A} =$

268  $D^{-1}(A + I)$  where  $I \in \mathbb{R}^{N \times N}$  is the identity matrix.

269 In this paper, we aim to train a Siamese graph encoder that embeds all nodes into the low-

270 dimension latent space in an unsupervised manner. The resultant latent embedding can then

271 be directly utilized to perform node clustering by clustering metrics such as K-means and

272 Leiden.

273

### 274 **The Overall Architecture of SGAE**

275 The overall architecture of SGAE consists of Graph Distortion, Siamese Encoders, Siamese

276 Decoders, and a reconstruction loss function.

277

### 278 **Graph Distortion**

279 We utilized two types of graph distortion including feature corruption and edge perturbation.

280 For feature corruption, which is the feature-level distortion, we apply Hadamard product to feature

281 matrix and a random noise matrix generated from a Gaussian distribution, i.e.,  $\tilde{X} = X \odot N$ ,

282 where  $\odot$  means the Hadamard product and  $N \sim N(1, 0.1)$ .

283 For edge perturbation, which is the structure-level distortion, we adopt two types of distortion, i.e.,

284 edge-removing and graph diffusion. For the edge removal, we generated a mask matrix  $M$

285 according to the similarity matrix by calculating the pair-wise cosine similarity in the latent space,  
 286 where the 10% of the lowest edges will be removed. The final adjacency matrix after edge  
 287 removal is

$$288 \quad A^m = D^{-\frac{1}{2}}((A \odot M) + I)D^{-\frac{1}{2}}$$

289

290 In the graph diffusion treatment, we used Personalized PageRank to calculate the normalized  
 291 adjacency matrix into a graph diffusion matrix by following MVGRL method[26]:

$$292 \quad A^d = \alpha \left( I - (1 - \alpha) \left( D^{-\frac{1}{2}}(A + I)D^{-\frac{1}{2}} \right) \right)^{-1}$$

293 where  $\alpha = 0.2$  as the teleport probability in a random walk.

294

### 295 Siamese Encoders

296 In order to reduce the utilization of space while learning richer cell representations, we  
 297 constructed two same encoders based on Siamese network structure to encode cell features.  
 298 The inputs of Siamese Encoders are graph  $G_1 = (X_1, A_m)$  and graph  $G_2 = (X_2, A_d)$ .  
 299 And the output is the embedding matrix  $H$ . First, we use two parameter-shared encoders  
 300 to encode graph  $G_1$  and graph  $G_2$  respectively, and generate embedding matrices  $H_1$  and  
 301  $H_2$ . The encoder in the  $l$ -th layer can be formulated as:

$$302 \quad H_1^{(l)} = \sigma \left( \widehat{A}_m H_1^{(l-1)} W_1^{(l)} \right) + \sigma \left( H_1^{(l-1)} W_2^{(l)} + b^{(l)} \right)$$

$$303 \quad H_2^{(l)} = \sigma \left( \widehat{A}_d H_2^{(l-1)} W_1^{(l)} \right) + \sigma \left( H_2^{(l-1)} W_2^{(l)} + b^{(l)} \right)$$

304 where,  $\widehat{A}_m = D_m^{-\frac{1}{2}}(A_m + I)D_m^{-\frac{1}{2}}$ ,  $\widehat{A}_d = D_d^{-\frac{1}{2}}(A_d + I)D_d^{-\frac{1}{2}}$ ,  $D_m$  and  $D_d$  are degree matrices  
 305 of  $A_m$  and  $A_d$ ,  $I$  is the identity matrix,  $W_1^{(l)}$  and  $W_2^{(l)}$  are weight matrices of encoders in  
 306 the  $l$ -th layer,  $b^{(l)}$  is the bias vector of encoder in the  $l$ -th layer,  $\sigma$  is the non-linear  
 307 activate function, such as ReLU and Tanh. When layer  $l = 1$ ,  $H_1^{(l-1)} = X_1$ .

308 Ultimately, the decorrelated latent embeddings derived from two different views, namely  
 309  $H_1$  and  $H_2$ , are merged using a linear combination operation. This amalgamation  
 310 produces clustering-focused latent embeddings that can be effectively employed for  
 311 clustering purposes, particularly through the utilization of the K-means algorithm.

312

### 313 **Siamese Decoders**

314 For SGAE, we construct a decoder based on graph convolutional neural networks, while  
315 reconstructing feature embeddings and adjacency matrices. The input is the embedding matrix  
316  $H$ , and the output is the original feature matrix  $X$  and the adjacency matrix  $A$ . Firstly,  
317 we use the graph convolutional neural network to decode the embedding  $H$  to generate a  
318 feature matrix  $\hat{H}$ , and the calculation formula of the  $k$  layer decoder is as follows:

$$319 \quad H^{(k)} = \sigma \left( D^{-\frac{1}{2}}(A + I)D^{-\frac{1}{2}}H^{(k-1)}W^{(k)} \right)$$

320 where  $D$  is the degree matrix of the matrix  $A$ , and  $W^{(k)}$  is the parameter matrix of the  
321  $k$ -th layer of the decoder. Then, taking inner product computation between the  
322 embedding matrix  $H$  and its transpose to generate the adjacency matrix  $\hat{A}$ .

323

### 324 **Reconstruction Loss Function**

325 Finally, we calculate the feature matrix reconstruction loss  $L_{REC-F}$ , the calculation  
326 formula is as follows:

$$327 \quad L_{REC-F} = \frac{1}{2N} \left\| AX - \hat{H} \right\|_F^2$$

328 Calculate the adjacency matrix reconstruction loss  $L_{REC-A}$ , the calculation formula is as  
329 follows:

$$330 \quad L_{REC-A} = \frac{1}{2N} \left\| A - \hat{A} \right\|_F^2$$

331

332 The reconstruction loss  $L_{REC}$  is the sum of the feature matrix reconstruction loss and the  
333 adjacency matrix reconstruction loss, and the calculation formula is as follows:

$$334 \quad L_{REC} = L_{REC-F} + L_{REC-A}$$

335

### 336 **Redundant Reduction Module**

337 In order to eliminate redundant information in node embedding and generate distinguishable  
338 embeddings for each node, the present invention designs a de-redundancy module, which  
339 eliminates redundant information from two levels: node level and feature level:

$$340 \quad S_N = \frac{H_1 H_2^T}{\|H_1\| \|H_2\|}$$

341 
$$S_F = \frac{Z_1 Z_2^T}{\|Z_1\| \|Z_2\|}$$

342 
$$L_{RR} = L_{RR-N} + L_{RR-F}$$

343

344 **Clustering Guidance Module**

345 In order to effectively learn the feature embedding related to the clustering task, the  
 346 present invention designs a clustering guidance module. Firstly, we pre-train the model, and  
 347 use K-means to cluster the generated node embeddings. Secondly, we construct a  
 348 clustering guidance loss  $L_C$  according to the node embedding matrix and the clustering  
 349 result of the previous step: a) Compute the soft assignment matrix  $Q$  for all nodes and pre-  
 350 trained cluster centers using the Student's t distribution. b) Generate the target distribution  
 351 matrix  $P$  according to the soft allocation matrix  $Q$ , the element  $p_{ij}$  of the  $i$  row  $j$   
 352 column is calculated by the following formula:

353 
$$p_{ij} = \frac{q_{ij}^2 / \sum_i q_{ij}}{\sum_{j'} (q_{ij'}^2 / \sum_i q_{ij'})}$$

354 Then compute the clustering guidance loss  $L_C$  using the KL divergence from the soft  
 355 assignment, the target distribution and the pretrained soft assignment.

356 During training, the model is optimized by minimizing the loss function:

357 
$$L = L_{REC} + L_C + L_{RR}$$

358 After the model training is completed, the main flow of data in the model inference  
 359 process is as follows: firstly, the model is used to obtain the low-dimensional feature  
 360 embedding  $H$  of cells, and then based on the learned embedding, K-means is used for  
 361 clustering, and finally the cluster labels of all cells are obtained.

362

363 **Clustering Refinement**

364 SGAE also incorporates an optional clustering refinement step. During this step, SGAE analyzes  
 365 the domain assignment of each spot and its neighboring spots. Specifically, for a given spot, the  
 366 label that appears most frequently among its surrounding spots is assigned to that spot. The  
 367 clustering refinement step was exclusively performed for the human DLPFC 10x Visium data.

368



## 369 **Performance Evaluation**

370 We use five indices to evaluate the quality of the clustering results: Adjusted Rand Index (ARI),  
371 Normalized Mutual Information (NMI), Fowlkes-Mallows Index (FMI), FM Index, and Moran  
372 Index. These indices provide different perspectives on the clustering performance. ARI measures  
373 the similarity of predicted types in the clusters, with a range from -1 to 1. NMI measures the  
374 relationship between variables and is normalized to a range of [0,1]. FMI calculates the geometric  
375 mean of pairwise precision and recall, also ranging from 0 to 1. FM Index evaluates the similarity  
376 between predicted and true binary rankings. The Moran Index is used to assess spatial  
377 autocorrelation in the clustering results. Together, these indices offer a comprehensive evaluation  
378 of the clustering quality across various aspects.

379

## 380 **Data Preprocessing**

381 SGAE utilizes transcriptome-wide gene expression profiles with spatial coordinates as  
382 input. The raw gene counts per spot are first normalized to the total counts per cell and  
383 then scaled through log-transformation. In the case of 3D Drosophila datasets, we did not  
384 employ any multi-slice integration method as there was little batch effect observed from  
385 the UMAP result. Principal component analysis (PCA) is then conducted on the gene  
386 expression data using the *sc.pp.pca()* function, and the top 50 principal components per  
387 spot are subsequently utilized as the default expression feature.

388

389 **Identifying differentially expressed genes.** Wilcoxon test implemented in SCANPY [27] is  
390 used to calculate differentially expressed genes for each spatial domain Benjamin-Hochberg  
391 adjustment correlation via *sc.tl.rank\_genes\_groups()*.

392

## 393 **Spatial trajectory inference**

394 We employed the PAGA algorithm [28] implemented in the SCANPY package to depict spatial  
395 trajectory. The PAGA trajectory and PAGA tree were inferred by the *scanpy.tl.paga()* function  
396 based on cell embedding generated by SGAE. Furthermore, *scanpy.tl.dpt()* was applied to  
397 estimate the pseudo time as well. To compare the performance of each clustering method with  
398 embedding, we calculate trajectory and pseudo time using methods above with same parameters

399 settings.

400

## 401 **Availability of supporting source code and requirements**

402 Project name: SGAE

403 Project home page: <https://github.com/STOmics/SGAE/>

404 Operating system: Linux

405 Programming language: Python

406 License: MIT license

407

## 408 **Data Availability**

409 Supporting data sets for this article are available via spatialLIBD

410 (<https://research.libd.org/spatialLIBD>), Brain Image Library (<https://doi.brainimagelibrary.org/>),

411 SpatialMouseAtlas (<https://crukci.shinyapps.io/SpatialMouseAtlas/>), Single Cell PORTAL

412 ([https://singlecell.broadinstitute.org/single\\_cell/study/SCP815/highly-sensitive-spatial-](https://singlecell.broadinstitute.org/single_cell/study/SCP815/highly-sensitive-spatial-)

413 [transcriptomics-at-near-cellular-resolution-with-slide-seqv2#study-summary](https://singlecell.broadinstitute.org/single_cell/study/SCP815/highly-sensitive-spatial-transcriptomics-at-near-cellular-resolution-with-slide-seqv2#study-summary)), CNGBdb

414 (<https://db.cngb.org/stomics/flysta3d/spatial>), and Zenodo (<https://zenodo.org/record/7340795>).

415

## 416 **Abbreviations**

417 ST: spatial transcriptomics, MERFISH: Multiplexed Error-Robust Fluorescence in situ

418 Hybridization, seqFISH: sequential fluorescence in situ hybridization, scRNA-Seq: single-cell

419 RNA sequencing, GCN: graph convolution network, GNN: graph neural network, DCRN: Dual

420 Correlation Reduction Network, VGAE: Variational Graph Autoencoder, SNN: spatial neighbor

421 network, UMAP: Uniform Manifold Approximation and Projection, KNN: K-nearest neighbors,

422 ARI: Adjusted Rand Index, NMI: Normalized Mutual Information, FMI: Fowlkes-Mallows Index,

423 DLPFC: dorsolateral prefrontal cortex, MI: Moran's Index.

424

## 425 **Funding**

426 This work is supported by National Natural Science Foundation for Young Scholars of China

427 (32300526) and National Key R&D Program of China (2022YFC3400400)

428

429 **Authors' Contributions**

430 S.F. and Y.Z. conceived and designed the study. W.J., L.C., C.Y. and Y.R. proposed the SGAE  
431 model. L.C., L.H., C.Y., and Y.J. performed the data analysis. T.X. helped with the 3D  
432 reconstruction analysis. M.L. X.X, and Y.L. participated in the study discussions. L.C., L.H.,  
433 C.Y., and S.F. wrote the manuscript.

434

435 **Competing Interests**

436 All authors declare no conflicts of interest in regard to this manuscript.

437

438 **ACKNOWLEDGEMENTS**

439 We thank Lidong Guo, Xiaobin Liu for their help to the manuscript. This work is part of the  
440 “SpatioTemporal Omics Consortium” (STOC) paper package. A list of STOC members is  
441 available at: <http://sto-consortium.org>. We acknowledge the Stomics Cloud platform to provide  
442 convenient ways for analyzing spatial omics datasets. We acknowledge the CNGB Nucleotide  
443 Sequence Archive (CNSA) of China National GeneBank DataBase (CNGBdb) for maintaining the  
444 MOSTA and Flysta3D database.

445

446 **References**

- 447 1. Park HE, Jo SH, Lee RH, Macks CP, Ku T, Park J, et al. Spatial Transcriptomics: Technical  
448 Aspects of Recent Developments and Their Applications in Neuroscience and Cancer  
449 Research. *Adv Sci (Weinh)*. 2023;10 16:e2206939. doi:10.1002/advs.202206939.
- 450 2. Larsson L, Frisen J and Lundeberg J. Spatially resolved transcriptomics adds a new dimension  
451 to genomics. *Nat Methods*. 2021;18 1:15-8. doi:10.1038/s41592-020-01038-7.
- 452 3. Chen KH, Boettiger AN, Moffitt JR, Wang S and Zhuang X. RNA imaging. Spatially  
453 resolved, highly multiplexed RNA profiling in single cells. *Science*. 2015;348 6233:aaa6090.  
454 doi:10.1126/science.aaa6090.
- 455 4. Shah S, Takei Y, Zhou W, Lubeck E, Yun J, Eng CL, et al. Dynamics and Spatial Genomics  
456 of the Nascent Transcriptome by Intron seqFISH. *Cell*. 2018;174 2:363-76 e16.  
457 doi:10.1016/j.cell.2018.05.035.
- 458 5. Rodriques SG, Stickels RR, Goeva A, Martin CA, Murray E, Vanderburg CR, et al. Slide-seq:  
459 A scalable technology for measuring genome-wide expression at high spatial resolution.  
460 *Science*. 2019;363 6434:1463-7. doi:10.1126/science.aaw1219.
- 461 6. Stahl PL, Salmen F, Vickovic S, Lundmark A, Navarro JF, Magnusson J, et al. Visualization  
462 and analysis of gene expression in tissue sections by spatial transcriptomics. *Science*.  
463 2016;353 6294:78-82. doi:10.1126/science.aaf2403.

- 464 7. Chen A, Liao S, Cheng M, Ma K, Wu L, Lai Y, et al. Spatiotemporal transcriptomic atlas of  
465 mouse organogenesis using DNA nanoball-patterned arrays. *Cell*. 2022;185 10:1777-92 e21.  
466 doi:10.1016/j.cell.2022.04.003.
- 467 8. Bressan D, Battistoni G and Hannon GJ. The dawn of spatial omics. *Science*. 2023;381  
468 6657:eabq4964. doi:10.1126/science.abq4964.
- 469 9. Burgess DJ. Spatial transcriptomics coming of age. *Nat Rev Genet*. 2019;20 6:317.  
470 doi:10.1038/s41576-019-0129-z.
- 471 10. Long Y, Ang KS, Li M, Chong KLK, Sethi R, Zhong C, et al. Spatially informed clustering,  
472 integration, and deconvolution of spatial transcriptomics with GraphST. *Nat Commun*.  
473 2023;14 1:1155. doi:10.1038/s41467-023-36796-3.
- 474 11. Li J, Chen S, Pan X, Yuan Y and Shen H-B. Cell clustering for spatial transcriptomics data  
475 with graph neural networks. *Nature Computational Science*. 2022;2 6:399-408.  
476 doi:10.1038/s43588-022-00266-5.
- 477 12. Hu J, Li X, Coleman K, Schroeder A, Ma N, Irwin DJ, et al. SpaGCN: Integrating gene  
478 expression, spatial location and histology to identify spatial domains and spatially variable  
479 genes by graph convolutional network. *Nat Methods*. 2021;18 11:1342-51.  
480 doi:10.1038/s41592-021-01255-8.
- 481 13. Dong K and Zhang S. Deciphering spatial domains from spatially resolved transcriptomics  
482 with an adaptive graph attention auto-encoder. *Nat Commun*. 2022;13 1:1739.  
483 doi:10.1038/s41467-022-29439-6.
- 484 14. Liu Y, Tu W, Zhou S, Liu X, Song L, Yang X, et al. Deep Graph Clustering via Dual  
485 Correlation Reduction. *arXiv e-prints*. 2021:arXiv:2112.14772.  
486 doi:10.48550/arXiv.2112.14772.
- 487 15. Kipf TN and Welling M. Variational Graph Auto-Encoders. *arXiv e-prints*.  
488 2016:arXiv:1611.07308. doi:10.48550/arXiv.1611.07308.
- 489 16. Page L, Brin S, Motwani R and Winograd T. The PageRank Citation Ranking : Bringing  
490 Order to the Web. In: *The Web Conference* 1999.
- 491 17. Zbontar J, Jing L, Misra I, LeCun Y and Deny SpJae-p. Barlow Twins: Self-Supervised  
492 Learning via Redundancy Reduction. 2021. doi:10.48550/arXiv.2103.03230.
- 493 18. Maynard KR, Collado-Torres L, Weber LM, Uyttingco C, Barry BK, Williams SR, et al.  
494 Transcriptome-scale spatial gene expression in the human dorsolateral prefrontal cortex. *Nat*  
495 *Neurosci*. 2021;24 3:425-36. doi:10.1038/s41593-020-00787-0.
- 496 19. Lohoff T, Ghazanfar S, Missarova A, Koulena N, Pierson N, Griffiths JA, et al. Integration of  
497 spatial and single-cell transcriptomic data elucidates mouse organogenesis. *Nat Biotechnol*.  
498 2022;40 1:74-85. doi:10.1038/s41587-021-01006-2.
- 499 20. Zhang M, Eichhorn SW, Zingg B, Yao Z, Cotter K, Zeng H, et al. Spatially resolved cell atlas  
500 of the mouse primary motor cortex by MERFISH. *Nature*. 2021;598 7879:137-43.  
501 doi:10.1038/s41586-021-03705-x.
- 502 21. Stickels RR, Murray E, Kumar P, Li J, Marshall JL, Di Bella DJ, et al. Highly sensitive spatial  
503 transcriptomics at near-cellular resolution with Slide-seqV2. *Nat Biotechnol*. 2021;39 3:313-9.  
504 doi:10.1038/s41587-020-0739-1.
- 505 22. Waltman L and Van Eck NJTEpjB. A smart local moving algorithm for large-scale  
506 modularity-based community detection. 2013;86:1-14.
- 507 23. Shen R, Liu L, Wu Z, Zhang Y, Yuan Z, Guo J, et al. Spatial-ID: a cell typing method for

508 spatially resolved transcriptomics via transfer learning and spatial embedding. Nat Commun.  
509 2022;13 1:7640. doi:10.1038/s41467-022-35288-0.

510 24. Zhou X, Dong K and Zhang S. Integrating spatial transcriptomics data across different  
511 conditions, technologies, and developmental stages. 2022:2022.12.26.521888.  
512 doi:10.1101/2022.12.26.521888 %J bioRxiv.

513 25. Wang M, Hu Q, Lv T, Wang Y, Lan Q, Xiang R, et al. High-resolution 3D spatiotemporal  
514 transcriptomic maps of developing Drosophila embryos and larvae. Dev Cell. 2022;57  
515 10:1271-83 e4. doi:10.1016/j.devcel.2022.04.006.

516 26. Hassani K and Hosein Khasahmadi A. Contrastive Multi-View Representation Learning on  
517 Graphs. arXiv e-prints. 2020:arXiv:2006.05582. doi:10.48550/arXiv.2006.05582.

518 27. Wolf FA, Angerer P and Theis FJ. SCANPY: large-scale single-cell gene expression data  
519 analysis. Genome Biol. 2018;19 1:15. doi:10.1186/s13059-017-1382-0.

520 28. Wolf FA, Hamey FK, Plass M, Solana J, Dahlin JS, Göttgens B, et al. PAGA: graph  
521 abstraction reconciles clustering with trajectory inference through a topology preserving map  
522 of single cells. Genome Biology. 2019;20 1:59. doi:10.1186/s13059-019-1663-x.

523

524

525 **Figure legends**

526 **Figure 1. An overview of SGAE framework.** SGAE algorithm consists of three key  
527 modules. Firstly, the graph distortion module generates two distorted graphs by introducing  
528 both attribute and graph disturbances. Secondly, the encoder module generates two sets of  
529 representations for each sample. Thirdly, the redundant reduction module ensures that the  
530 same sample within the two distorted graphs has identical representations at both the feature  
531 and sample levels. Lastly, the discriminative representations are applied to clustering  
532 algorithms such as k-means to decipher spatial domains.

533 **Figure 2. SGAE exhibited high effectiveness and robustness in spatial domain**  
534 **exploration.** (A-D) Visualization of clustering results from SGAE, SpaGCN, GraphST,  
535 STAGATE, Leiden and annotation. (A) Human dorsolateral prefrontal cortex (DLPFC) 10x  
536 Visium dataset, (B) Mouse gastrulation seqFISH dataset, (C) Mouse cortex MERFISH  
537 dataset, (D) Mouse olfactory bulb SLIDE-seq v2 dataset. (E-G) Benchmark metrics  
538 comparison of SGAE against SpaGCN, GraphST, STAGATE and Leiden. (E) 12 DLPFC 10x  
539 Visium datasets, (F) Mouse gastrulation seqFISH dataset, (G) Mouse cortex MERFISH  
540 dataset.

541 **Figure 3. SGAE unraveled spatial domains and provided discriminative representations.** (A)  
542 Visualization of human adult brain clustering results from SGAE, SpaGCN, STAGATE, CCST,  
543 and GraphST. (B) Subclustering results of DGGRC2, TEGLU24 and HBGLU from SGAE, SpaGCN,  
544 STAGATE, CCST, and GraphST. (C) Benchmark metrics comparison of SGAE against SpaGCN,  
545 STAGATE, CCST, and GraphST. (D) Moran's Index comparison of SGAE against SpaGCN,  
546 STAGATE, CCST, and GraphST. (E) UMAP visualization of embedding from SGAE, SpaGCN,  
547 STAGATE and GraphST. (F) F score of pseudo-time calculated from embedding provided by PCA,  
548 CCST, STAGATE and GraphST.

549 **Figure 4. SGAE enhanced complex spatial domain dissection in 3D Drosophila Embryo.** (A) 2D  
550 visualization of Drosophila Embryo clustering results at different stages (E14-16, E16-18, and  
551 L1) from SGAE and STAligner. (B) Benchmark metrics comparison of SGAE, Leiden and  
552 STAligner. (C) 3D visualization of Drosophila Embryo. The first row showed the marker  
553 genes of Drosophila Embryo at different stages, while the last three rows displayed the meshes  
554 generated by SGAE, STAligner and Leiden respectively.

Figure 1

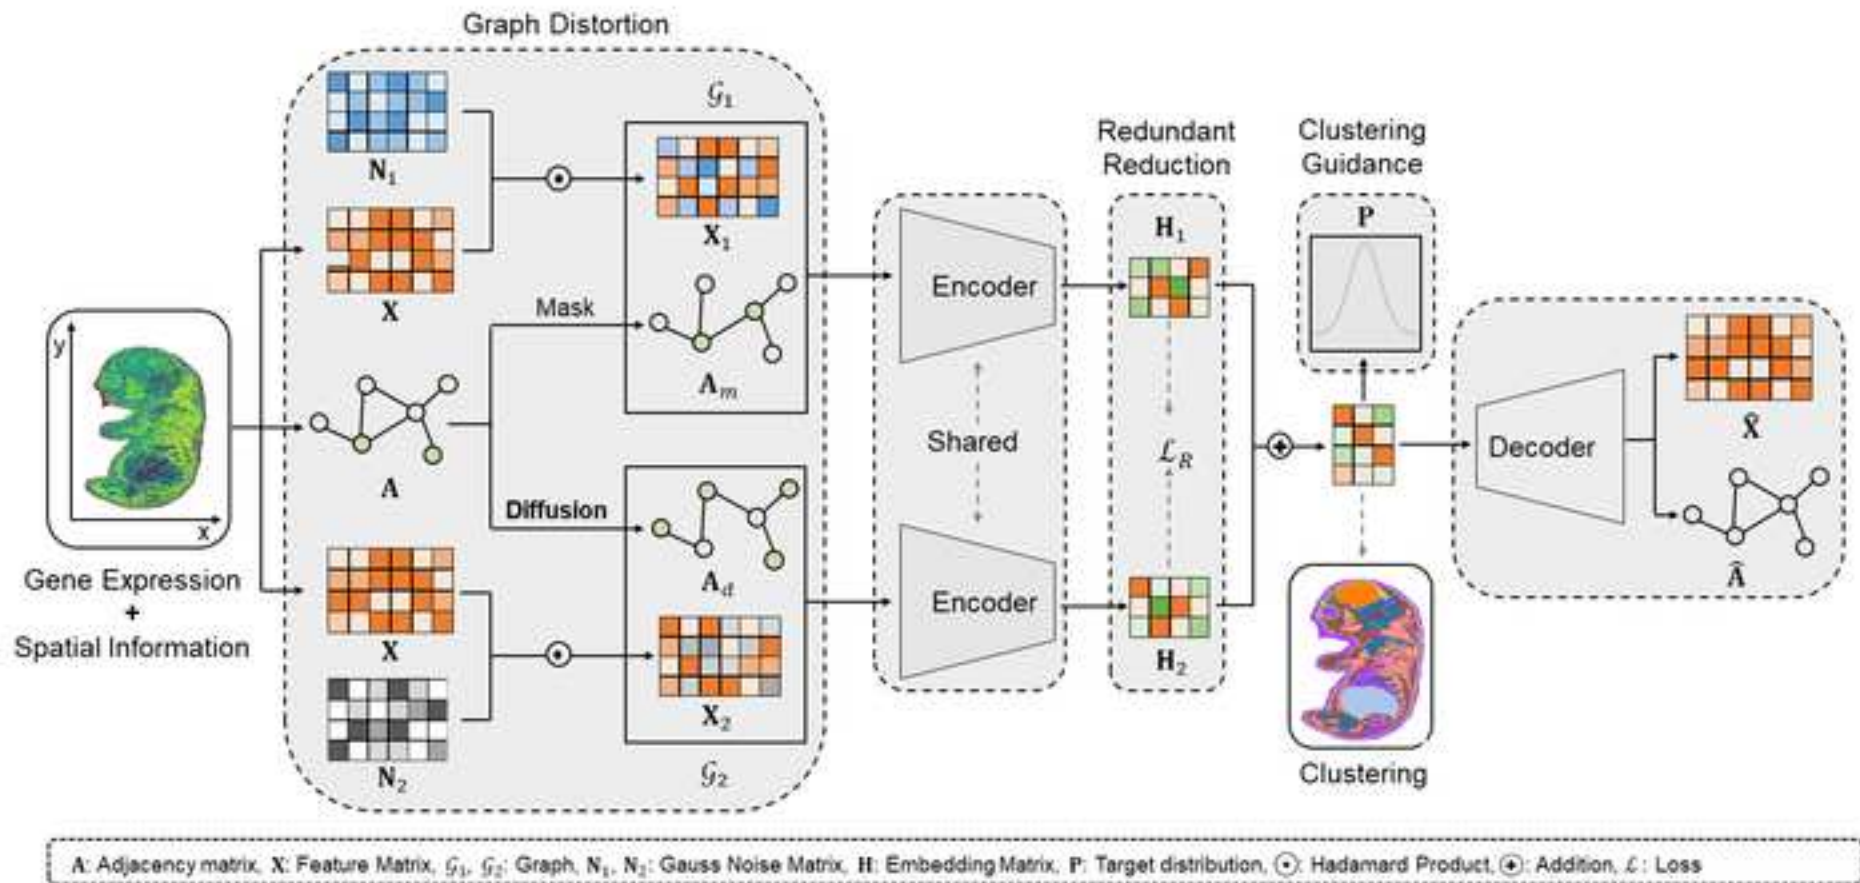



## Figure 2

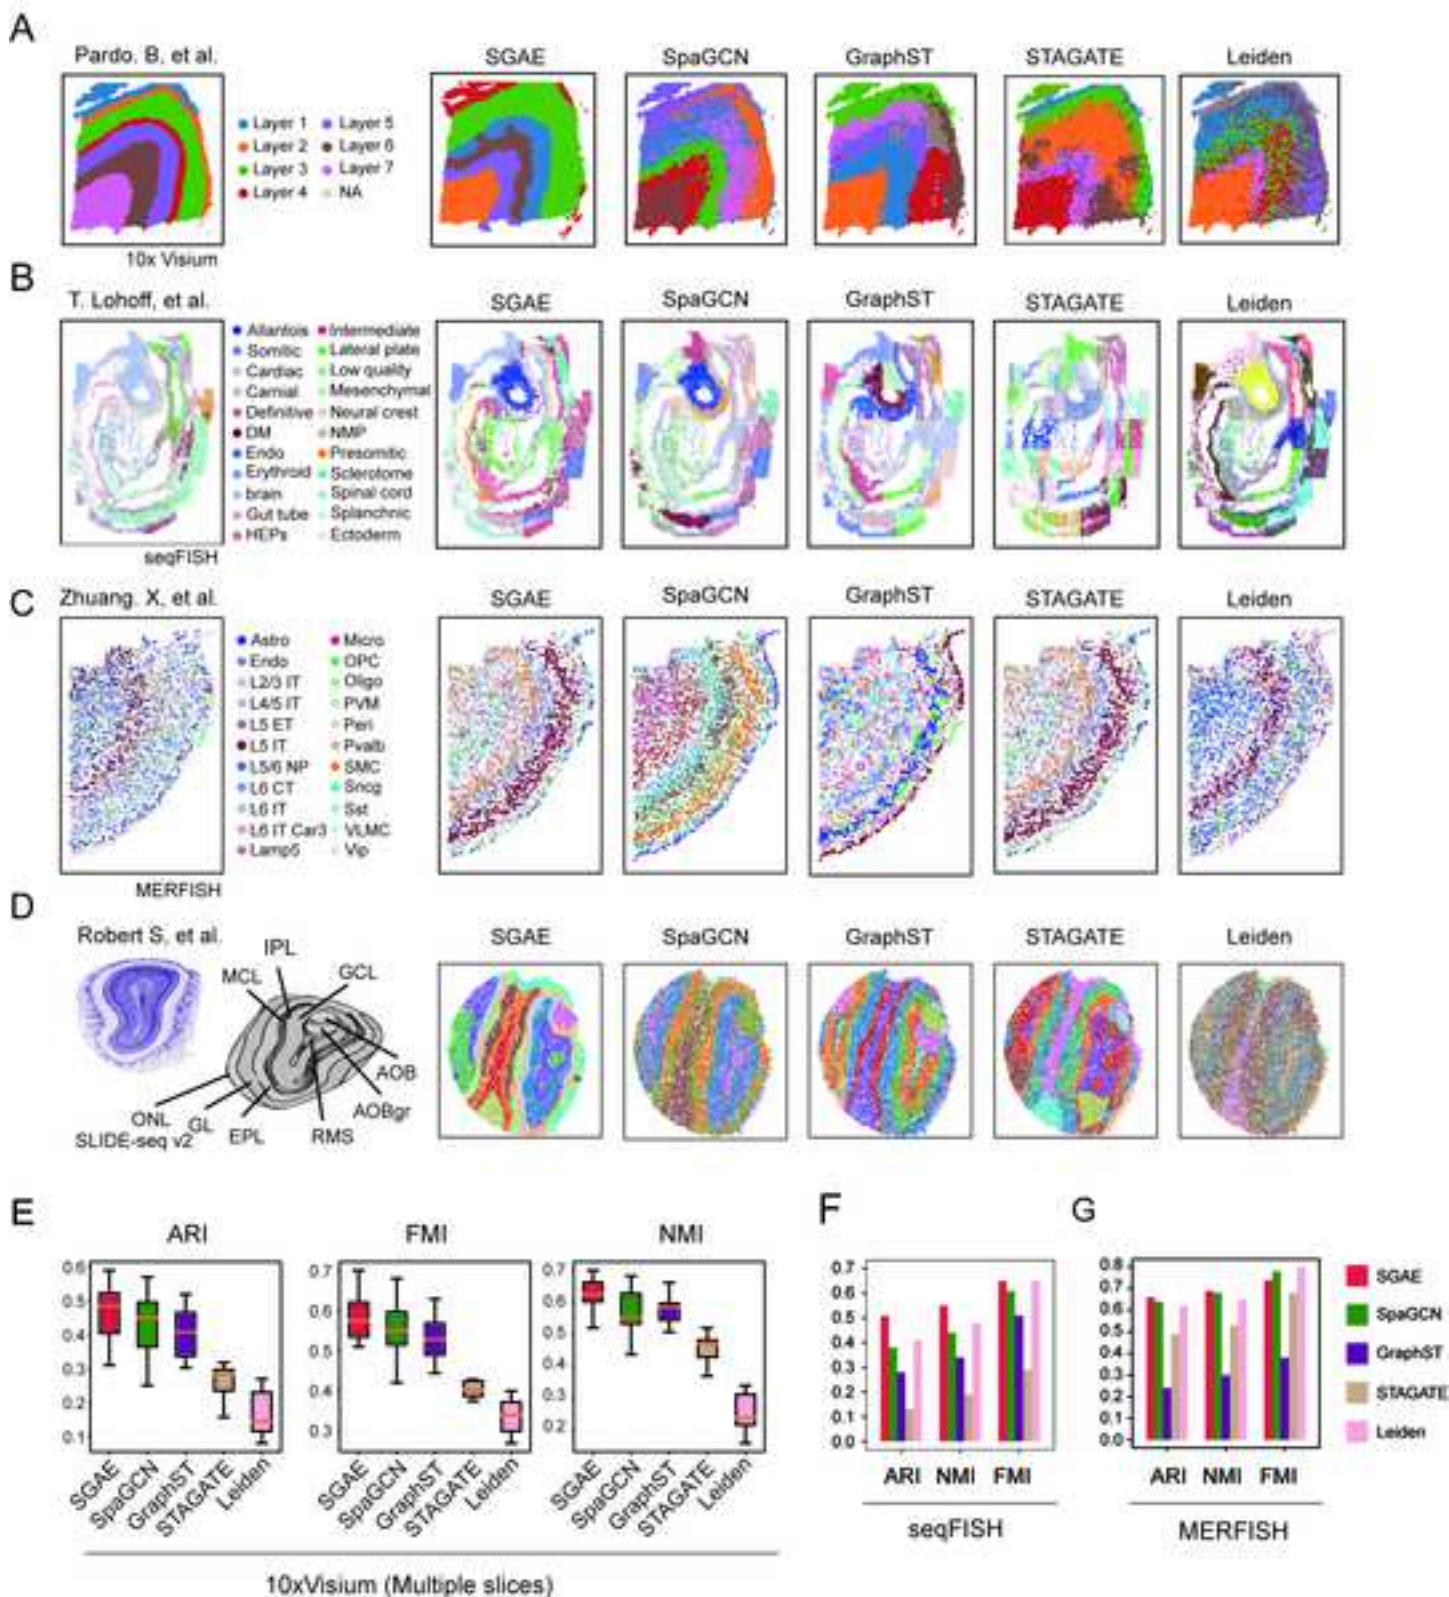



**Figure 3**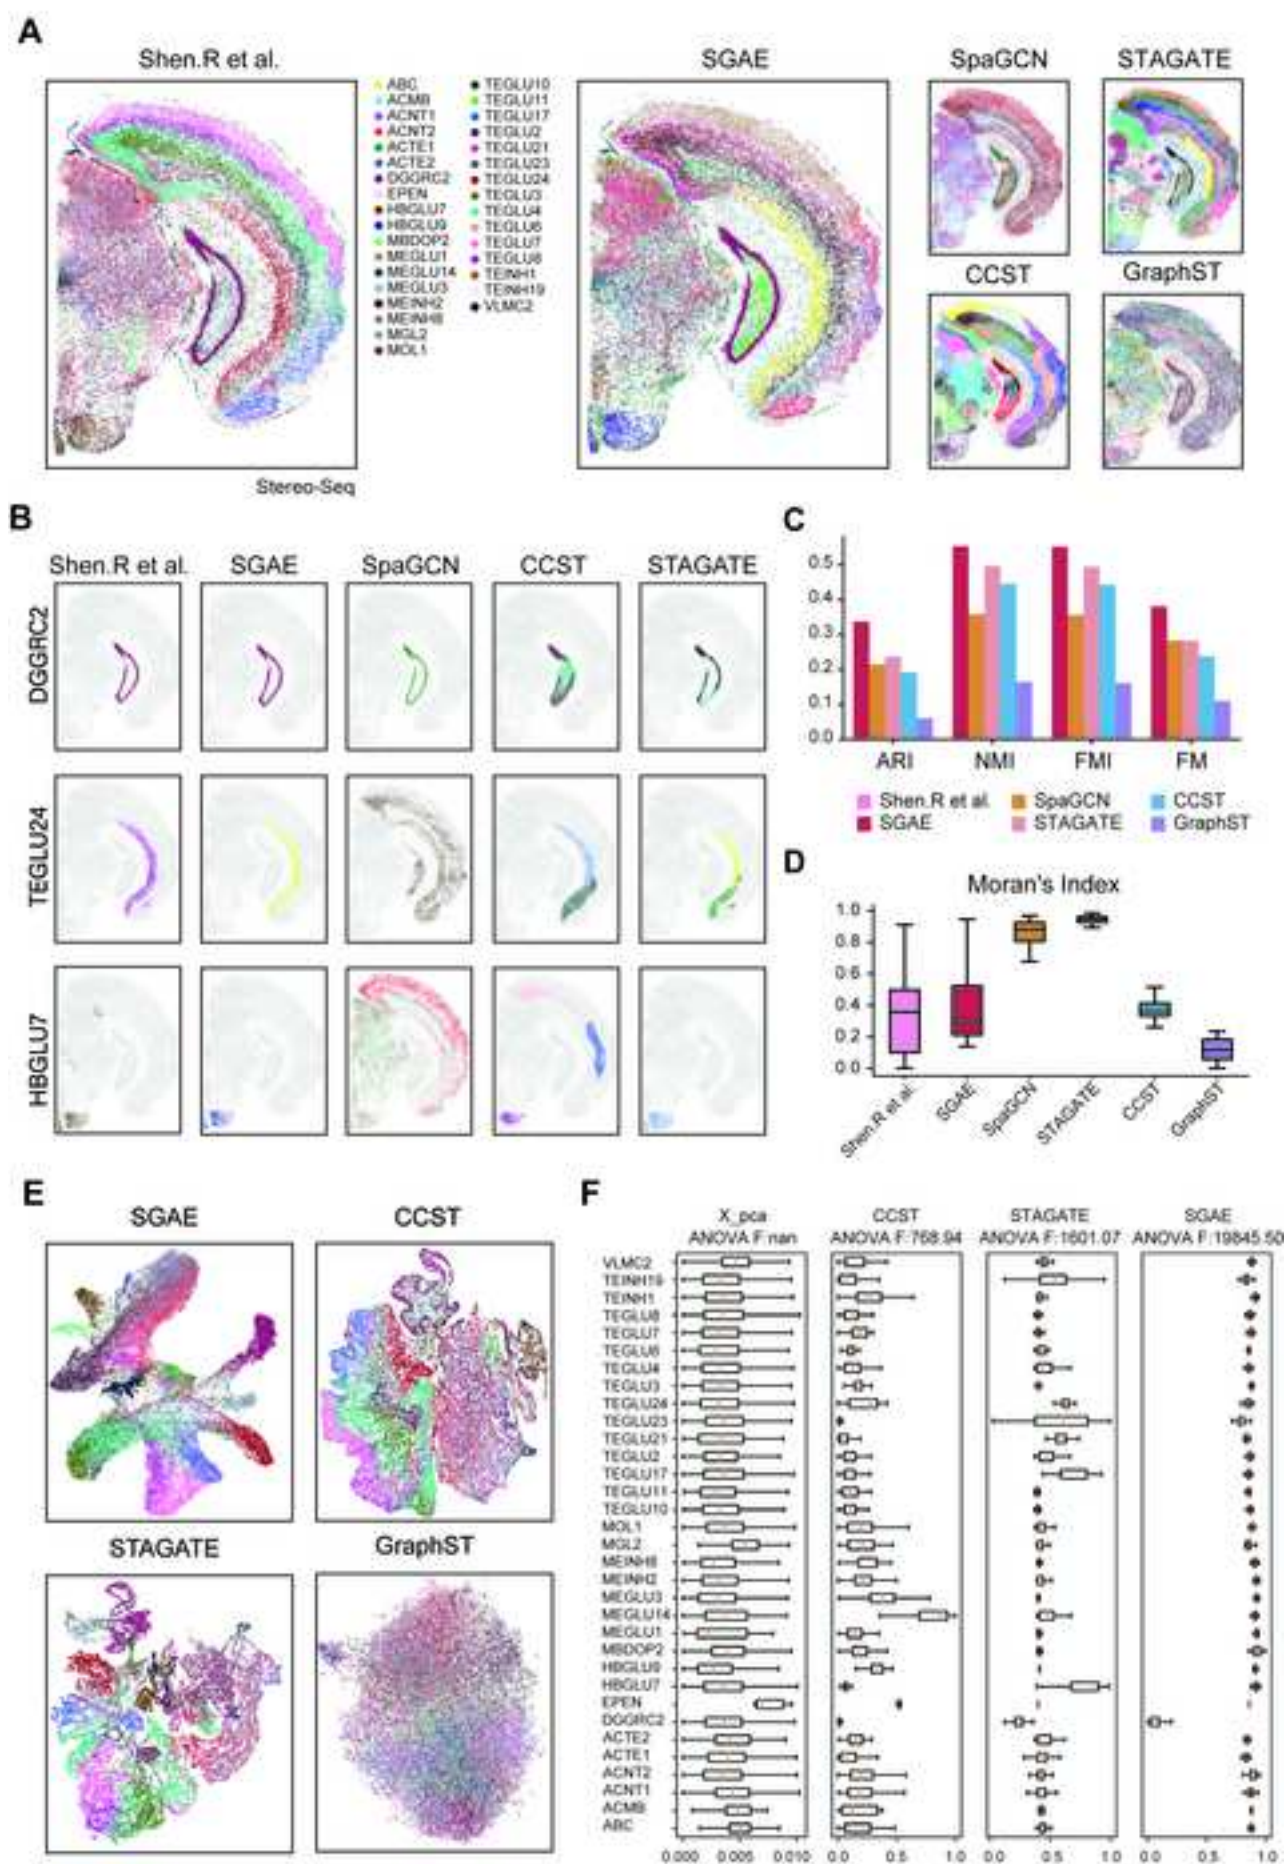

**Figure 4**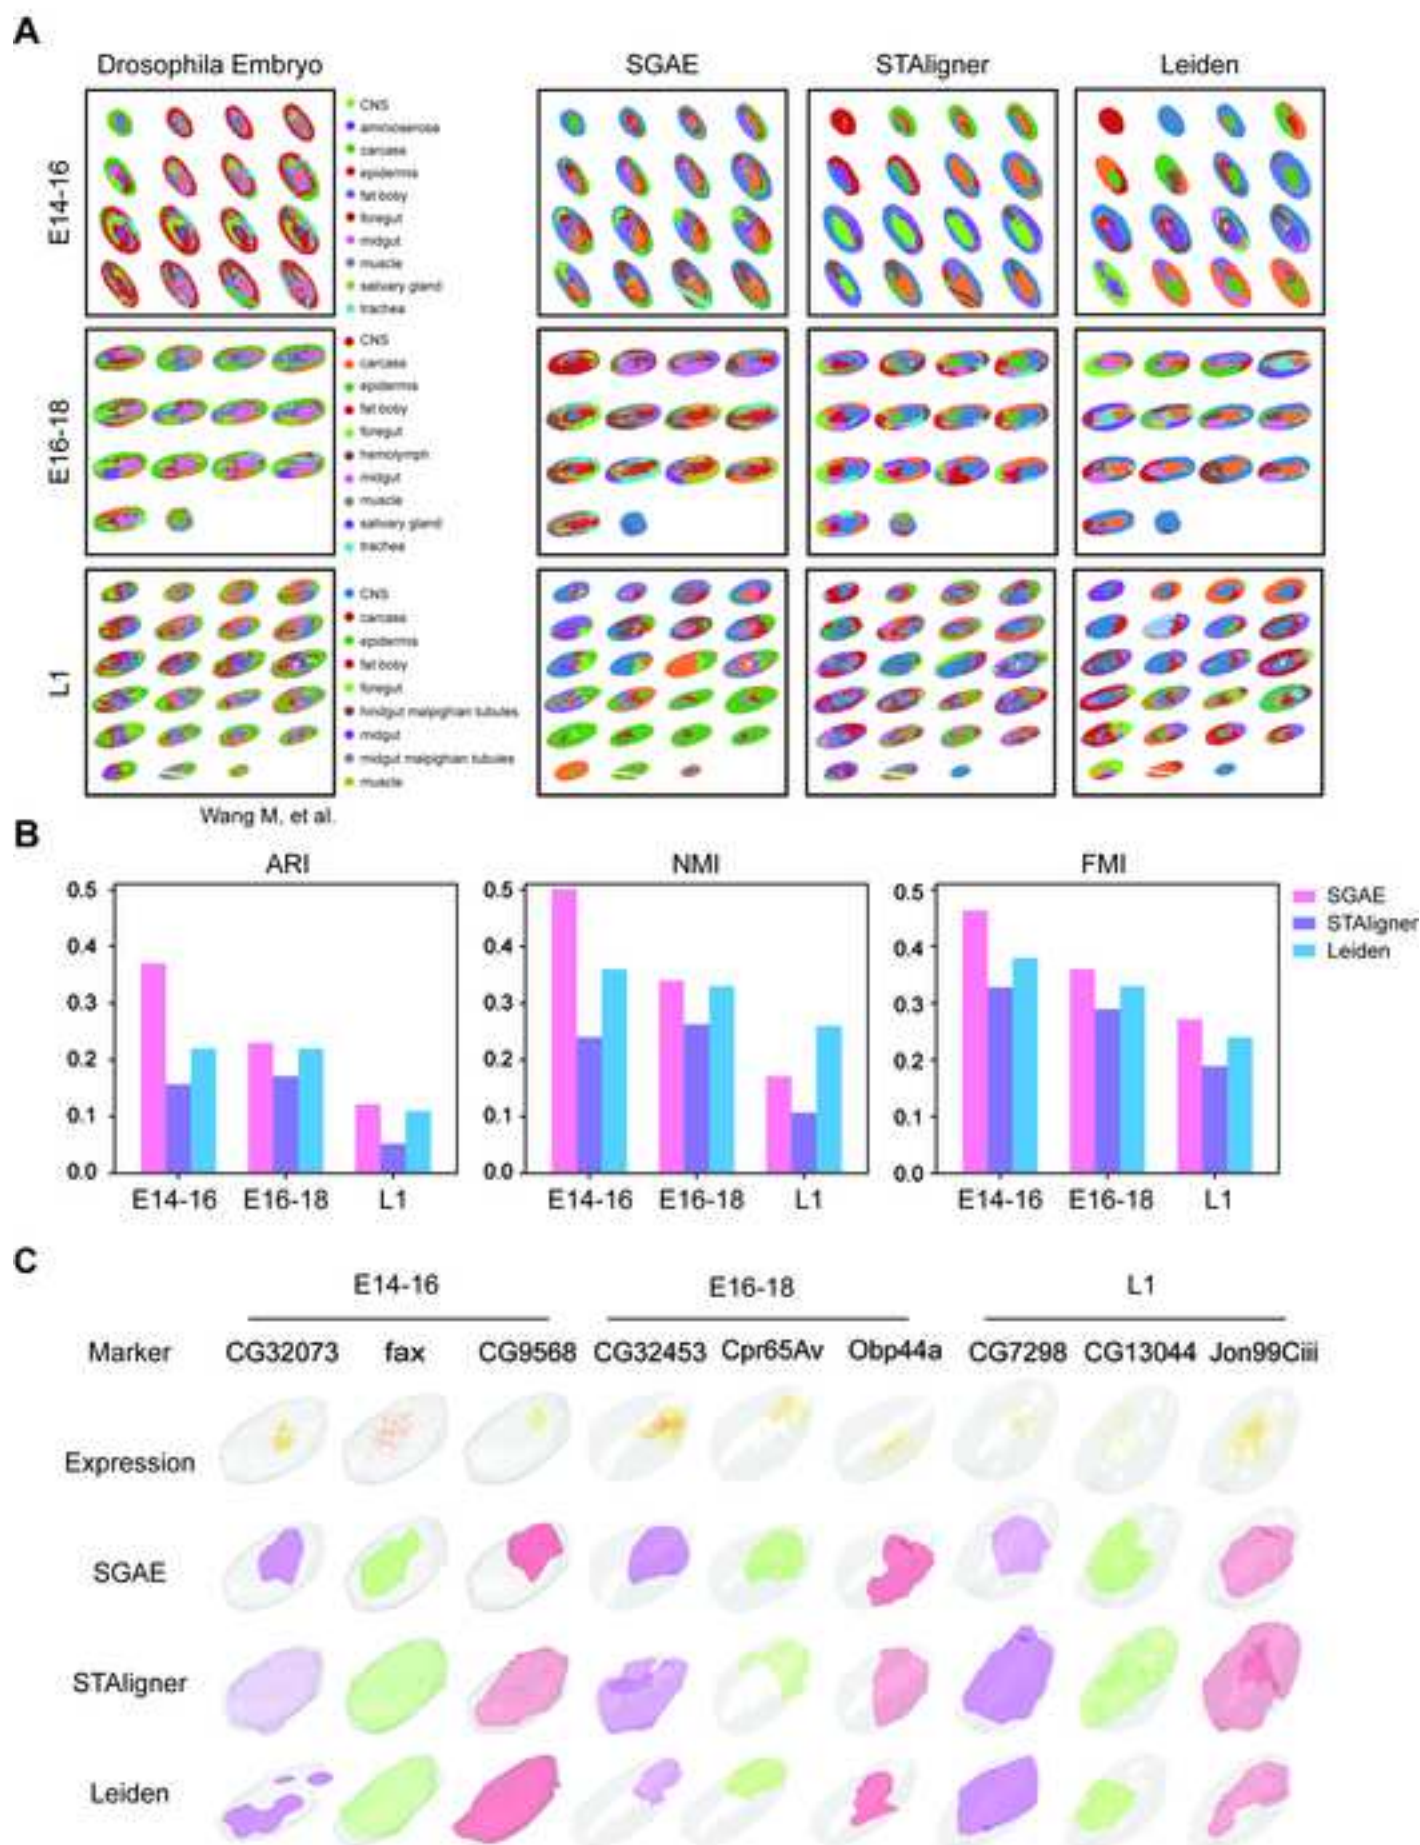

October 31, 2023

Dear editors,

We hereby submit our original manuscript entitled “Deciphering spatial domains from spatially resolved transcriptomics with Siamese Graph Autoencoder” for consideration by GigaScience. We confirm that this work is original and has not been previously published, nor is currently being reviewed for publication elsewhere.

In this paper, we describe a Siamese Graph Autoencoder (SGAE) spatial domain identification method for spatial transcriptomics. SGAE mitigates the information correlation at both sample and feature level, thus improving the representation discrimination. With an enhanced cellular representation, SGAE enables improved spatial domain identification and facilitates downstream analyses, such as trajectory inference. Entire computational framework of SGAE has been validated in multiple tissue samples from various technology platforms. All of which achieved state-of-the-art performance on the evaluation of clustering index including ARI, FMI and NMI. We believe this work effectively addresses the spatial domain identification for spatial transcriptomics with improved representation discrimination.

This work belongs to the thematic series of Spatio-temporal omics algorithms.

We have no conflicts of interest to disclose.

Please address all correspondence regarding this manuscript to me at [lvtongxuan@genomics.cn](mailto:lvtongxuan@genomics.cn).

Thank you for your consideration of our manuscript.

Sincerely,  
Shuangfang Fang

Suggested referees:

Dechao Bu, Institute of Computing Technology, Chinese Academy of Sciences,  
[budechao@ict.ac.cn](mailto:budechao@ict.ac.cn)

Yang Wu, Institute of Computing Technology, Chinese Academy of Sciences, [wuyang@ict.ac.cn](mailto:wuyang@ict.ac.cn)

Lianhe Zhao, Institute of Computing Technology, Chinese Academy of Sciences,  
[zhaolianhe@ict.ac.cn](mailto:zhaolianhe@ict.ac.cn)

Liang Sun, Shandong First Medical University, [sunliang@sdfmu.edu.cn](mailto:sunliang@sdfmu.edu.cn)

Chunquan Li, University of South China, [lcqbio@163.com](mailto:lcqbio@163.com)

Chao Song, University of South China, [songchaooverload@163.com](mailto:songchaooverload@163.com)

Xiaobin Wu, Guangzhou Medical University China, [wuxiaobin2023@gmail.com](mailto:wuxiaobin2023@gmail.com)

Jianqi She, Peking University China, [janky@pku.edu.cn](mailto:janky@pku.edu.cn)

Bowen Zhang, Beijing Normal University, [zhangbowen3187@gmail.com](mailto:zhangbowen3187@gmail.com)

Jia Song, Shanghai Jiaotong university, [songjiajia2010@shsmu.edu.cn](mailto:songjiajia2010@shsmu.edu.cn)
