# Supplementary material for: Deciphering spatial domains from spatially resolved transcriptomics with Siamese graph autoencoder
Source: PubMed Central journal article supplement (PMC10939418; doi:10.1093/gigascience/giae003), 2024-02-20
Supplement: giae003_giga-d-23-00329_revision_1.pdf [file giae003_giga-d-23-00329_revision_1.pdf]

# GigaScience

## Deciphering spatial domains from spatially resolved transcriptomics with Siamese Graph Autoencoder --Manuscript Draft--

|                                                      |                                                                                                                                                                                                                                                                                                                                                                                                                                                                                                                                                                                                                                                                                                                                                                                                                                                                                                                                                                                                                                                                                                                                                                                                                                                                                                                                                                                                                                                                                                                                                                                                                                                                                                                                                                                                                                                                                                                             |                     |
|------------------------------------------------------|-----------------------------------------------------------------------------------------------------------------------------------------------------------------------------------------------------------------------------------------------------------------------------------------------------------------------------------------------------------------------------------------------------------------------------------------------------------------------------------------------------------------------------------------------------------------------------------------------------------------------------------------------------------------------------------------------------------------------------------------------------------------------------------------------------------------------------------------------------------------------------------------------------------------------------------------------------------------------------------------------------------------------------------------------------------------------------------------------------------------------------------------------------------------------------------------------------------------------------------------------------------------------------------------------------------------------------------------------------------------------------------------------------------------------------------------------------------------------------------------------------------------------------------------------------------------------------------------------------------------------------------------------------------------------------------------------------------------------------------------------------------------------------------------------------------------------------------------------------------------------------------------------------------------------------|---------------------|
| <b>Manuscript Number:</b>                            | GIGA-D-23-00329R1                                                                                                                                                                                                                                                                                                                                                                                                                                                                                                                                                                                                                                                                                                                                                                                                                                                                                                                                                                                                                                                                                                                                                                                                                                                                                                                                                                                                                                                                                                                                                                                                                                                                                                                                                                                                                                                                                                           |                     |
| <b>Full Title:</b>                                   | Deciphering spatial domains from spatially resolved transcriptomics with Siamese Graph Autoencoder                                                                                                                                                                                                                                                                                                                                                                                                                                                                                                                                                                                                                                                                                                                                                                                                                                                                                                                                                                                                                                                                                                                                                                                                                                                                                                                                                                                                                                                                                                                                                                                                                                                                                                                                                                                                                          |                     |
| <b>Article Type:</b>                                 | Technical Note                                                                                                                                                                                                                                                                                                                                                                                                                                                                                                                                                                                                                                                                                                                                                                                                                                                                                                                                                                                                                                                                                                                                                                                                                                                                                                                                                                                                                                                                                                                                                                                                                                                                                                                                                                                                                                                                                                              |                     |
| <b>Funding Information:</b>                          | National Natural Science Foundation of China (32300526)                                                                                                                                                                                                                                                                                                                                                                                                                                                                                                                                                                                                                                                                                                                                                                                                                                                                                                                                                                                                                                                                                                                                                                                                                                                                                                                                                                                                                                                                                                                                                                                                                                                                                                                                                                                                                                                                     | Dr. Shuangfang Fang |
|                                                      | National Key R&D Program of China (2022YFC3400400)                                                                                                                                                                                                                                                                                                                                                                                                                                                                                                                                                                                                                                                                                                                                                                                                                                                                                                                                                                                                                                                                                                                                                                                                                                                                                                                                                                                                                                                                                                                                                                                                                                                                                                                                                                                                                                                                          | Pro. Xun Xu         |
| <b>Abstract:</b>                                     | <p><b>Background</b></p> <p>Cell clustering is a pivotal aspect of spatial transcriptomics (ST) data analysis as it forms the foundation for subsequent data mining. Recent advances in spatial domain identification have leveraged Graph Neural Network approaches in conjunction with spatial transcriptomics data. However, such GNN-based methods suffer from representation collapse, wherein all spatial spots are projected onto a singular representation. Consequently, the discriminative capability of individual representation feature is limited, leading to suboptimal clustering performance.</p> <p><b>Results</b></p> <p>To address this issue, we proposed SGAE, a novel framework for spatial domain identification, incorporating the power of Siamese Graph Autoencoder. SGAE mitigates the information correlation at the both sample and feature level, thus improving the representation discrimination. We adapted this framework to ST analysis by constructing a graph based on both gene expression and spatial information. SGAE outperformed alternative methods by its effectiveness in capturing spatial patterns and generating high-quality clusters, as evaluated by ARI, FMI, and NMI. Moreover, the clustering results derived from SGAE can be further utilized in the identification of 3D Drosophila embryonic structure with enhanced accuracy.</p> <p><b>Conclusions</b></p> <p>Benchmarking results from various ST datasets generated by diverse platforms demonstrate compelling evidence for the effectiveness of SGAE against other ST clustering methods. Specifically, SGAE exhibits potential for extension and application on multi-slice 3D reconstruction and tissue structure investigation. The source code and a collection of spatial clustering results can be accessed at <a href="https://github.com/STOmics/SGAE/">https://github.com/STOmics/SGAE/</a>.</p> |                     |
| <b>Corresponding Author:</b>                         | Shuangfang Fang<br>BGI Group<br>BeiJing, CHINA                                                                                                                                                                                                                                                                                                                                                                                                                                                                                                                                                                                                                                                                                                                                                                                                                                                                                                                                                                                                                                                                                                                                                                                                                                                                                                                                                                                                                                                                                                                                                                                                                                                                                                                                                                                                                                                                              |                     |
| <b>Corresponding Author Secondary Information:</b>   |                                                                                                                                                                                                                                                                                                                                                                                                                                                                                                                                                                                                                                                                                                                                                                                                                                                                                                                                                                                                                                                                                                                                                                                                                                                                                                                                                                                                                                                                                                                                                                                                                                                                                                                                                                                                                                                                                                                             |                     |
| <b>Corresponding Author's Institution:</b>           | BGI Group                                                                                                                                                                                                                                                                                                                                                                                                                                                                                                                                                                                                                                                                                                                                                                                                                                                                                                                                                                                                                                                                                                                                                                                                                                                                                                                                                                                                                                                                                                                                                                                                                                                                                                                                                                                                                                                                                                                   |                     |
| <b>Corresponding Author's Secondary Institution:</b> |                                                                                                                                                                                                                                                                                                                                                                                                                                                                                                                                                                                                                                                                                                                                                                                                                                                                                                                                                                                                                                                                                                                                                                                                                                                                                                                                                                                                                                                                                                                                                                                                                                                                                                                                                                                                                                                                                                                             |                     |
| <b>First Author:</b>                                 | Shuangfang Fang                                                                                                                                                                                                                                                                                                                                                                                                                                                                                                                                                                                                                                                                                                                                                                                                                                                                                                                                                                                                                                                                                                                                                                                                                                                                                                                                                                                                                                                                                                                                                                                                                                                                                                                                                                                                                                                                                                             |                     |
| <b>First Author Secondary Information:</b>           |                                                                                                                                                                                                                                                                                                                                                                                                                                                                                                                                                                                                                                                                                                                                                                                                                                                                                                                                                                                                                                                                                                                                                                                                                                                                                                                                                                                                                                                                                                                                                                                                                                                                                                                                                                                                                                                                                                                             |                     |
| <b>Order of Authors:</b>                             | Shuangfang Fang                                                                                                                                                                                                                                                                                                                                                                                                                                                                                                                                                                                                                                                                                                                                                                                                                                                                                                                                                                                                                                                                                                                                                                                                                                                                                                                                                                                                                                                                                                                                                                                                                                                                                                                                                                                                                                                                                                             |                     |

|                                                                                                                                                                                                                                                                                                  |                                                                                                                                                                                                                                                                                                                                                                                                                                                                                                                                                                                                                                                                                                                                                                                                                                                                                         |
|--------------------------------------------------------------------------------------------------------------------------------------------------------------------------------------------------------------------------------------------------------------------------------------------------|-----------------------------------------------------------------------------------------------------------------------------------------------------------------------------------------------------------------------------------------------------------------------------------------------------------------------------------------------------------------------------------------------------------------------------------------------------------------------------------------------------------------------------------------------------------------------------------------------------------------------------------------------------------------------------------------------------------------------------------------------------------------------------------------------------------------------------------------------------------------------------------------|
|                                                                                                                                                                                                                                                                                                  | Lei Cao                                                                                                                                                                                                                                                                                                                                                                                                                                                                                                                                                                                                                                                                                                                                                                                                                                                                                 |
|                                                                                                                                                                                                                                                                                                  | Chao Yang                                                                                                                                                                                                                                                                                                                                                                                                                                                                                                                                                                                                                                                                                                                                                                                                                                                                               |
|                                                                                                                                                                                                                                                                                                  | Luni Hu                                                                                                                                                                                                                                                                                                                                                                                                                                                                                                                                                                                                                                                                                                                                                                                                                                                                                 |
|                                                                                                                                                                                                                                                                                                  | Wenjian Jiang                                                                                                                                                                                                                                                                                                                                                                                                                                                                                                                                                                                                                                                                                                                                                                                                                                                                           |
|                                                                                                                                                                                                                                                                                                  | Yating Ren                                                                                                                                                                                                                                                                                                                                                                                                                                                                                                                                                                                                                                                                                                                                                                                                                                                                              |
|                                                                                                                                                                                                                                                                                                  | Tianyi Xia                                                                                                                                                                                                                                                                                                                                                                                                                                                                                                                                                                                                                                                                                                                                                                                                                                                                              |
|                                                                                                                                                                                                                                                                                                  | Mengyang Xu                                                                                                                                                                                                                                                                                                                                                                                                                                                                                                                                                                                                                                                                                                                                                                                                                                                                             |
|                                                                                                                                                                                                                                                                                                  | Yishuai Ji                                                                                                                                                                                                                                                                                                                                                                                                                                                                                                                                                                                                                                                                                                                                                                                                                                                                              |
|                                                                                                                                                                                                                                                                                                  | Mei Li                                                                                                                                                                                                                                                                                                                                                                                                                                                                                                                                                                                                                                                                                                                                                                                                                                                                                  |
|                                                                                                                                                                                                                                                                                                  | Xun Xu                                                                                                                                                                                                                                                                                                                                                                                                                                                                                                                                                                                                                                                                                                                                                                                                                                                                                  |
|                                                                                                                                                                                                                                                                                                  | Yuxiang Li                                                                                                                                                                                                                                                                                                                                                                                                                                                                                                                                                                                                                                                                                                                                                                                                                                                                              |
|                                                                                                                                                                                                                                                                                                  | Yong Zhang                                                                                                                                                                                                                                                                                                                                                                                                                                                                                                                                                                                                                                                                                                                                                                                                                                                                              |
| <b>Order of Authors Secondary Information:</b>                                                                                                                                                                                                                                                   |                                                                                                                                                                                                                                                                                                                                                                                                                                                                                                                                                                                                                                                                                                                                                                                                                                                                                         |
| <b>Response to Reviewers:</b>                                                                                                                                                                                                                                                                    | <p>Dear Editor,</p> <p>Thank you for handling our manuscript entitled "Deciphering spatial domains from spatially resolved transcriptomics with Siamese Graph Autoencoder" and providing us with an opportunity to revise our work. We are delighted to receive positive remarks from both the editors and reviewers regarding our study. We would also like to express our sincere appreciation for the constructive comments provided by both the editors and reviewers, which have greatly strengthened our work.</p> <p>We are grateful to the editors for sharing the comments of all three reviewers with us. In this revision, we have diligently addressed all the suggested experiments proposed by reviewers. Please find our point-by-point responses to the editors' comments in the cover letter.</p> <p>Sincerely,<br/>Shuangfang Fang<br/>fangshuangfang@genomics.cn</p> |
| <b>Additional Information:</b>                                                                                                                                                                                                                                                                   |                                                                                                                                                                                                                                                                                                                                                                                                                                                                                                                                                                                                                                                                                                                                                                                                                                                                                         |
| <b>Question</b>                                                                                                                                                                                                                                                                                  | <b>Response</b>                                                                                                                                                                                                                                                                                                                                                                                                                                                                                                                                                                                                                                                                                                                                                                                                                                                                         |
| Are you submitting this manuscript to a special series or article collection?                                                                                                                                                                                                                    | No                                                                                                                                                                                                                                                                                                                                                                                                                                                                                                                                                                                                                                                                                                                                                                                                                                                                                      |
| <b>Experimental design and statistics</b>                                                                                                                                                                                                                                                        | Yes                                                                                                                                                                                                                                                                                                                                                                                                                                                                                                                                                                                                                                                                                                                                                                                                                                                                                     |
| Full details of the experimental design and statistical methods used should be given in the Methods section, as detailed in our <a href="#">Minimum Standards Reporting Checklist</a> . Information essential to interpreting the data presented should be made available in the figure legends. |                                                                                                                                                                                                                                                                                                                                                                                                                                                                                                                                                                                                                                                                                                                                                                                                                                                                                         |
| Have you included all the information requested in your manuscript?                                                                                                                                                                                                                              |                                                                                                                                                                                                                                                                                                                                                                                                                                                                                                                                                                                                                                                                                                                                                                                                                                                                                         |

|                                                                                                                                                                                                                                                                                                                                                                                                                                                                                                                                                         |            |
|---------------------------------------------------------------------------------------------------------------------------------------------------------------------------------------------------------------------------------------------------------------------------------------------------------------------------------------------------------------------------------------------------------------------------------------------------------------------------------------------------------------------------------------------------------|------------|
| <p><b>Resources</b></p> <p>A description of all resources used, including antibodies, cell lines, animals and software tools, with enough information to allow them to be uniquely identified, should be included in the Methods section. Authors are strongly encouraged to cite <a href="#">Research Resource Identifiers</a> (RRIDs) for antibodies, model organisms and tools, where possible.</p> <p>Have you included the information requested as detailed in our <a href="#">Minimum Standards Reporting Checklist</a>?</p>                     | <p>Yes</p> |
| <p><b>Availability of data and materials</b></p> <p>All datasets and code on which the conclusions of the paper rely must be either included in your submission or deposited in <a href="#">publicly available repositories</a> (where available and ethically appropriate), referencing such data using a unique identifier in the references and in the “Availability of Data and Materials” section of your manuscript.</p> <p>Have you have met the above requirement as detailed in our <a href="#">Minimum Standards Reporting Checklist</a>?</p> | <p>Yes</p> |

1      **Deciphering spatial domains from spatially resolved transcriptomics**  
2                                    **with Siamese Graph Autoencoder**

3            Lei Cao<sup>1,2†</sup>, Chao Yang<sup>1,2†</sup>, Luni Hu<sup>1,2†</sup>, Wenjian Jiang<sup>1,2,‡</sup>, Yating Ren<sup>3</sup>, Tianyi Xia<sup>1,2</sup>,  
4   Mengyang Xu<sup>2,4</sup>, Yishuai Ji<sup>5</sup>, Mei Li<sup>2</sup>, Xun Xu<sup>6</sup>, Yuxiang Li<sup>2,6,7</sup>, Yong Zhang<sup>2,6,7\*</sup>, Shuangfang  
5                                    Fang<sup>1,2\*</sup>

6  
7   1 BGI Research, Beijing 102601, China.

8   2 BGI Research, Shenzhen 518083, China.

9   3 School of Software, Beihang University, Beijing, 100191, China

10   4 BGI Research, Qingdao 266555, China.

11   5 BGI, Tianjin 300308, China.

12   6 BGI Research, Wuhan 430074, China.

13   7 Guangdong Bigdata Engineering Technology Research Center for Life Sciences, BGI research,  
14   Shenzhen 518083, China.

15

16   \* Corresponding: [fangshuangfang@genomics.cn](mailto:fangshuangfang@genomics.cn), [zhangyong2@stomics.tech](mailto:zhangyong2@stomics.tech)

17   † These authors contributed equally as the first authors.

18   ‡ Senior author.

19   ORCID iDs: Shuangfang Fang [0000-0002-4126-0074]; Lei Cao [0000-0002-7170-9602]; Chao

20   Yang; Luni Hu; Wenjian Jiang; Yating Ren; Tianyi Xia; Mengyang Xu [0000-0002-4487-7088];

21   Yishuai Ji; Mei Li; Xun Xu [0000-0002-5338-5173]; Yuxiang Li [0000-0002-1575-3692]; Yong

22   Zhang [0000-0001-9950-1793];

23 **Abstract**

24 **Background**

25 Cell clustering is a pivotal aspect of spatial transcriptomics (ST) data analysis as it forms the  
26 foundation for subsequent data mining. Recent advances in spatial domain identification have  
27 leveraged Graph Neural Network approaches in conjunction with spatial transcriptomics data.  
28 However, such GNN-based methods suffer from representation collapse, wherein all spatial spots  
29 are projected onto a singular representation. Consequently, the discriminative capability of  
30 individual representation feature is limited, leading to suboptimal clustering performance.

31 **Results**

32 To address this issue, we proposed SGAE, a novel framework for spatial domain identification,  
33 incorporating the power of Siamese Graph Autoencoder. SGAE mitigates the information  
34 correlation at both sample and feature level, thus improving the representation discrimination. We  
35 adapted this framework to ST analysis by constructing a graph based on both gene expression and  
36 spatial information. SGAE outperformed alternative methods by its effectiveness in capturing  
37 spatial patterns and generating high-quality clusters, as evaluated by ARI, FMI, and NMI.  
38 Moreover, the clustering results derived from SGAE can be further utilized in the identification of  
39 3D Drosophila embryonic structure with enhanced accuracy.

40 **Conclusions**

41 Benchmarking results from various ST datasets generated by diverse platforms demonstrate  
42 compelling evidence for the effectiveness of SGAE against other ST clustering methods.  
43 Specifically, SGAE exhibits potential for extension and application on multi-slice 3D  
44 reconstruction and tissue structure investigation. The source code and a collection of spatial  
45 clustering results can be accessed at <https://github.com/STOmics/SGAE/>.

46

47 **Keywords:** Spatial transcriptomics; Spatial clustering; Graph neural networks

48

## 49 **Background**

50 Spatial transcriptomics (ST) represents a newly emerging technology that revolutionizes the  
51 comprehensive characterization of tissue organization and architecture[1, 2]. By profiling the  
52 spatially-resolved gene expression patterns, ST technologies allow scientists to delve into the  
53 intricate cellular dynamics within tissues. Based on the underlying methodology, these techniques  
54 can be categorized into two main categories: (1) imaging-based methods (MERFISH[3] and  
55 seqFISH[4]), and (2) sequencing-based methods (Slide-seq[5] and 10x Visium[6]). As the need  
56 for higher-resolution analysis to unravel cellular diversity becomes imperative, advancements  
57 such as Stereo-seq[7] have been developed to provide improved resolution over the years. The  
58 advent of ST technologies holds immense potential to drive biological discoveries in development,  
59 physiology and a broad range of diseases[8, 9].

60

61 In parallel with single-cell RNA sequencing (scRNA-Seq) analysis, clustering serves as the initial  
62 step in ST data analysis, grouping individual cells based on their gene expression patterns.

63 Similarly, the primary objective for ST data analysis revolves around dissecting tissue into distinct  
64 spatial domains. While traditional machine learning approaches have been applied to tackle this  
65 task, recent studies have sought to apply deep learning frameworks to learn how to classify spatial  
66 spots into specific regions[10-13]. For instance, SpaGCN[12] identifies spatial domains through a  
67 graph convolutional network (GCN) framework, while STAGATE[13] deploys a graph attention  
68 autoencoder to define spatial clusters. However, such graph neural network (GNN) based methods  
69 usually suffer from representations collapse, which tends to map spatial spots into the same  
70 representation[14]. Consequently, the discriminative capability of spot representation is limited,  
71 leading to inaccurate identification of spatial domains.

72

73 To tackle the aforementioned challenge, we proposed SGAE, which aims to learn discriminative  
74 spot representation and accurately decipher spatial domains. This framework is derived from the  
75 Dual Correlation Reduction Network (DCRN)[14], which effectively reduces information  
76 correlation at the dual level. SGAE adapts this architecture to ST data analysis by constructing a  
77 graph that incorporates both gene expression and spatial information. According to benchmarking  
78 assessments, SGAE outperforms existing algorithms in the task of domain identification with

79 superior performance. Moreover, SGAE can be extended in the realm of 3D tissue structure  
80 identification.

81

## 82 **Results**

### 83 **Overview of SGAE framework**

84 SGAE is an unsupervised algorithm for ST clustering that leverages a Variational Graph  
85 Autoencoder (VGAE)[15] within a Siamese graph neural network to combine gene expression and  
86 spatial information (Fig.1). To implement SGAE, the gene expression matrix ( $X$ ) and adjacency  
87 matrix ( $A$ ) are fed into the encoder, which maps the gene expression data into a lower-dimensional  
88 latent space, generating embedding vectors ( $Z$ ) for individual cells. Pseudo-label is firstly  
89 generated by pre-clustering based on gene expression patterns. SGAE adaptively learns the edge  
90 weights of the spatial neighbor network (SNN) to capture the similarity between neighboring spots  
91 and update the spot representation by aggregating information from neighbors. Finally, the latent  
92 embeddings can be visualized using Uniform Manifold Approximation and Projection (UMAP)  
93 and various clustering algorithms such as K-means and Louvain can be employed to identify  
94 spatial domains for subsequent analysis.

95

96 By calculating K-nearest neighbors (KNN) based on the relative spatial positioning of spots,  
97 SGAE can effectively capture the spatial relationships between cells. This is especially essential  
98 for spatial transcriptomics (ST) data with low spatial resolutions, such as 10x Visium, where  
99 discerning fine-grained spatial details can be challenging. Besides, SGAE introduces the concept  
100 of a cell type-aware SNN by pruning the SNN based on the pre-clustering of gene expressions.  
101 This preliminary clustering step aids in identifying regions that contain distinct cell types.  
102 Through the incorporation of cell type information during the graph construction process, SGAE  
103 adeptly captures data heterogeneity and improve the accuracy of the graph representation.

104

105 SGAE uses graph distortion to acquire diverse and informative node representations. This is  
106 achieved through the application of two types of perturbation: feature perturbation and graph  
107 perturbation. For feature perturbation, a random noise matrix is introduced to the feature matrix  
108 using the Hadamard product. On the other hand, graph perturbation involves edge removal and

109 graph diffusion within the Siamese architecture. To implement edge removal, a mask matrix is  
110 generated based on the cosine similarity matrix computed through pairwise comparisons in the  
111 latent space. The 10% of edges with the lowest values are then removed. Graph diffusion is  
112 facilitated using a random walk-based Personalized PageRank algorithm[16], allowing for the  
113 passage of messages through higher-order neighborhoods. To optimize the learning process,  
114 SGAE employs an objective function inspired by the Barlow Twins approach[17], aiming to  
115 minimize the deviation of the cross-correlation matrix from the ideal identity matrix and reduce  
116 redundant information among nodes in the latent space, therefore improving the overall accuracy  
117 of the learned embedding.

118

### 119 **SGAE exhibited remarkable effectiveness and robustness in spatial domain exploration**

120 ST datasets generated by different technology platforms possess distinct resolutions and features,  
121 making it essential to validate the clustering robustness of SGAE across these platforms. To  
122 achieve this, we included ST datasets generated by 10x Visium, seqFISH [18], MERFISH [3],  
123 SLIDE-seq v2 [19], and Stereo-seq [7]. For 10x Visium datasets, samples of human dorsolateral  
124 prefrontal cortex have been collected, which comprises 12 continuous slides, and each slide has  
125 been labeled into 7 layers based on the anatomical structure [20]. For seqFISH, we acquired a  
126 sample of mouse gastrulation [21]. 351 genes have been detected and 19416 cells were labeled  
127 into 22 groups. Similar to seqFISH, a mouse primary motor cortex dataset which includes 254  
128 genes and 3106 cells was detected by MERFISH [22]. As for the SLIDE-seq v2, a mouse  
129 olfactory bulb dataset which contains 20139 cells and 21220 genes was included to test the  
130 performance of SGAE [19]. To test the performance in tissue without clear structure. Liver cancer  
131 from Stereo-seq [23] is utilized. The dataset contains 14288 spots and a margin area between  
132 cancer and healthy tissue can be seen according to the H&E staining. Then we comprehensively  
133 compare the clustering performance of SGAE against other state-of-the-art spatial clustering  
134 methods, including SpaGCN[12], GraphST[10], STAGATE[13] and Leiden[24]. Clustering  
135 performance was assessed by spatial visualization combined with Adjusted Rand Index (ARI),  
136 Normalized Mutual Information (NMI) and Fowlkes-Mallows Index (FMI).

137

### 138 **Human dorsolateral prefrontal cortex 10x Visium dataset**



139 We applied SGAE to analyze the 10x Visium ST dataset obtained from the human  
140 dorsolateral prefrontal cortex (DLPFC)[20]. The visualization of cell clustering confirmed  
141 that SGAE was able to discern the intricate stratified cortex structures with remarkable  
142 clarity, surpassing the capabilities of other existing methods (Fig. 2A). Furthermore, our  
143 benchmarking results revealed that SGAE outperformed other algorithms in analyzing all 12  
144 DLPFC slices (Fig. 2E).

145

#### 146 **Mouse gastrulation seqFISH dataset**

147 The evaluation of SGAE's performance extends to the mouse gastrulation dataset, which was  
148 generated through the imaging-based technology seqFISH[21]. The visualization of mouse  
149 gastrulation structures derived from different methods demonstrates higher effectiveness of SGAE  
150 in accurately discriminating embryo tissue sections (Fig. 2B). In contrast, STAGATE failed to  
151 decipher the spatial domain with precision, as it tends to divide the spatial domain into numerous  
152 disorder patches. Notably, SGAE reaffirmed its superiority in all benchmark metrics against  
153 other methods (Fig. 2F).

154

#### 155 **Mouse cortex MERFISH dataset**

156 Based on the MERFISH dataset of the mouse primary motor cortex[22], we further compare  
157 the clustering results obtained by different methods. While all five methods successfully  
158 extract the stratified structure of the cortex, SGAE demonstrates a remarkable ability to  
159 capture the layered organization of the glutamatergic structures more accurately when  
160 compared to the original annotation (Fig. 2C). Furthermore, SGAE achieved the highest  
161 performance among all five methods, underscoring its effectiveness in precisely clustering  
162 cells and capturing the spatial arrangement of the primary motor cortex (Fig 2G).

163

#### 164 **Mouse olfactory bulb SLIDE-seq v2 dataset**

165 The evaluation also encompasses the SLIDE-seq V2 dataset of the mouse olfactory bulb[19].  
166 The spatial domains identified by SGAE exhibited remarkable consistency with the annotation  
167 provided by the Allen Reference Atlas, strengthening the confidence in its accuracy and reliability  
168 (Fig. 2D). Conversely, the Leiden clustering approach failed to provide a cohesive tissue structure

169 in this dataset, while SpaGCN, GraphST, and STAGATE partially deciphered certain structures  
170 within the olfactory bulb.

171

### 172 **Liver cancer Stereo-seq dataset**

173 SGAE and alternative clustering methods were tested on a liver cancer sample obtained from  
174 Stereo-seq. The application of SGAE resulted in a clearer and more accurate identification of the  
175 margin border based on H&E staining (Supplementary Fig 1A-B). Notably, SGAE also detected  
176 clusters consisting of discrete spots located in different positions, reflecting the heterogeneous  
177 nature of the tumor tissue. To assess the spatial correlation of the clustering results, we computed  
178 the Moran's Index. The Moran's Index revealed that alternative methods tended to overutilize  
179 spatial information and identify clusters in blocks (Supplementary Fig 1C). To further evaluate the  
180 accuracy of the clustering results obtained by these tools, we focused on the rare cell type  
181 fibroblast and used VIM as a marker gene for fibroblasts. We visualized the spatial distribution of  
182 VIM and compared it with the most probable cluster identified by each of the methods. The results  
183 showed that Cluster 6 in SGAE exhibited a higher similarity to the spatial expression of VIM  
184 compared to other methods (Supplementary Fig 1D-E).

185

186 Overall, our results unequivocally establish SGAE as a powerful method for analyzing ST data,  
187 surpassing other state-of-the-art methods in terms of cell clustering performance and structure  
188 exploration of complex tissues.

189

### 190 **SGAE deciphers spatial domains and provides discriminative representations**

191 Stereo-seq is a novel ST technology that offers subcellular resolution and has opened up new  
192 avenues for investigating the intricate structures within complex tissues[7]. However, the  
193 exploitation of its high-resolution capabilities necessitates the utilization of advanced clustering  
194 and spatial analysis methods. Therefore, we conducted a meticulous evaluation of SGAE's  
195 clustering performance using a Stereo-seq dataset of the mouse adult brain dataset [25]. It  
196 comprises a total of 38811 cells and 20062 genes and has been labeled into 38 subclasses through  
197 manually annotation. Intriguingly, SGAE showcased exceptional discriminative power in  
198 accurately distinguishing mouse brain sections within this dataset, outperforming other methods

199 such as SpaGCN, STAGATE, CCST, and GraphST (Fig. 3A). Subcluster analysis further  
200 demonstrated the superior performance of SGAE (Fig. 3B). SGAE accurately delineated distinct  
201 subpopulations within the tissue, whereas STAGATE inaccurately divided the DGGRC2 and  
202 TEGLU24 regions into two separate clusters, and SpaGCN assigned a larger region for TEGLU24  
203 and HBGLU.

204

205 To provide a systematic comparison, we conducted an extensive evaluation of SGAE's clustering  
206 results using multiple benchmark metrics, including ARI, NMI, and FMI. Remarkably, SGAE  
207 outperformed all other existing methods across all benchmark metrics (Fig. 3C). Besides, we  
208 utilized Moran's Index (MI) to assess the spatial autocorrelation of each cluster. Although  
209 SpaGCN and STAGATE achieved higher MI scores, SGAE exhibited a distribution most closely  
210 aligned with the ground truth in terms of MI (Fig. 3D). It is suggested that SGAE effectively  
211 utilizes spatial information in a more reasonable and appropriate manner.

212

213 Furthermore, we evaluated the representative embedding provided by SGAE, CCST[11],  
214 STAGATE, and GraphST through UMAP visualization (Fig. 3E). The results showed that SGAE  
215 exhibited a high-level of proficiency in extracting the embedding of the mouse brain Stereo-seq  
216 data, while GraphST struggled to distinguish different cell groups. To further evaluate the  
217 capability of SGAE to characterize biological representation, we performed pseudotime analysis  
218 and calculated the ANOVA F-score for each cell type (Fig. 3F). Surprisingly, SGAE achieved the  
219 highest ANOVA F-score, highlighting the discriminative capability of SGAE's embedding in  
220 accurately distinguishing between different cell types.

221

222 Taken together, these findings provide compelling evidence that SGAE not only surpasses other  
223 methods in terms of clustering accuracy, but also excels in providing superior embedding  
224 representation for the datasets.

225

## 226 **SGAE enhanced complex spatial domain dissection in 3D Drosophila**

227 The advanced use of ST clustering involves integrating 3D reconstruction technology to gain a  
228 comprehensive understanding of the spatial organization and gene expression patterns within

229 complex tissues. The fundamental topic of 3D tissue structure dissection is to identify shared and  
230 specific spatial domains across multiple slices of ST datasets. Our investigation sought to  
231 determine whether SGAE could effectively accomplish this challenging multi-slice clustering  
232 task, especially for the datasets with less batch effect (Supplementary Figure 2). Notably, we  
233 found that SGAE surpassed Leiden and STAligner[26] in accurately dissecting the spatial domains  
234 of *Drosophila* embryos at different stages (E14-16, E16-18 and L1)[27], as evidenced by its higher  
235 similarity to the ground truth (Fig4. A, B). These findings highlighted the effectiveness of SGAE  
236 in achieving reliable multi-slice clustering for ST analysis.

237

238 After obtaining the clustering results from SGAE, STAligner and Leiden, we proceeded with the  
239 crucial step of stack slice registration to enable 3D tissue reconstruction. This involved aligning  
240 consecutive tissue slices to generate a complete and accurate 3D representation of the tissue. We  
241 observed that the 3D meshes generated from SGAE results exhibited exceptional accuracy in  
242 dividing the tissue into correct structures, aligning perfectly with the corresponding marker genes  
243 (Fig. 4C). It indicated that the spatial domains generated by SGAE are highly effective in  
244 achieving promising 3D tissue reconstruction. In contrast, STAligner and Leiden faltered in  
245 accurately dividing the tissue into correct structures in certain cases. This suggests the robustness  
246 and reliability of the spatial domains generated by SGAE.

247

## 248 **Discussion**

249 Spatial transcriptomics is a cutting-edge technology that allows us to simultaneously capture gene  
250 expression while retain spatial information of the tissue. The emergence of large-scale ST data has  
251 increased the demand for effective algorithms capable of dissecting spatial domains. To achieve  
252 this, we proposed SGAE, a framework composed of two identical encoders based on a Siamese  
253 network, which enabled us to encode cell features. Additionally, SGAE employs a graph neural  
254 network that facilitates the learning of informative representations of both gene expression and  
255 spatial locations. To fully leverage the spatial information provided by ST, we constructed a graph  
256 based on the spatial information of each cell and pre-clustered gene expression. We then used a  
257 linear combination operation to merge the decorrelated latent embeddings, enhancing the  
258 discriminative power of the resulting embedding and clustering accuracy, thus facilitating

259 comprehensive analysis to provide profound insights into complex biological systems.  
260  
261 Our study demonstrates the effectiveness and robustness of SGAE in capturing tissue structures  
262 across different ST technology platforms. This superiority over other methods indicates the  
263 immense potential of SGAE as a reliable tool for analyzing ST datasets. Another notable strength  
264 of SGAE lies in its ability to accurately capture the heterogeneity present within ST datasets. The  
265 complexity and diversity of cell types within tissues pose significant challenges in accurately  
266 characterizing gene expression patterns. Notably, SGAE's embedding successfully captures the  
267 heterogenic information, enabling a more comprehensive understanding of the spatial organization  
268 of gene expression patterns within tissues. While SGAE has demonstrated its advantages in ST  
269 clustering, further validation across a wider range of ST datasets and biological systems is  
270 necessary to fully assess the generalizability of SGAE's performance.

271

272 In this study, we also applied SGAE to analyze the Drosophila 3D dataset and unravel the spatial  
273 domains during the E14-16, E16-18, and Larva L1 stages. We further compared the performance  
274 of SGAE with that of STAligner, a commonly used method developed for multi-slice ST analysis.  
275 By evaluating benchmark metrics, we consistently observed that SGAE outperformed STAligner  
276 in effectively grouping cells into biologically meaningful clusters. The superior clustering results  
277 of SGAE carry significant implications for the analysis of 3D tissue structure reconstruction. In  
278 conclusion, SGAE demonstrates its proficiency in spatial domain identification on spatial  
279 transcriptomics with moderate batch effect. For datasets with a high batch effect, it is  
280 recommended to integrate batch removal methods upstream of SGAE to effectively mitigate this  
281 issue. By accurately categorizing cells into reasonable groups, SGAE could contribute to a more  
282 precise characterization of the spatial organization of gene expression patterns. This is particularly  
283 important for understanding the complex processes underlying biological development and  
284 differentiation.

285

## 286 **Methods**

### 287 **Notations and Problem Definition**

288 An undirected graph is usually represented by  $G = \{V, E\}$ , where  $V = \{v_1, v_2, \dots, v_N\}$  and

289  $E$  are the node and edge respectively. Each node  $v_i$  is characterized by a vector  $x_i \in R^D$ ,  
 290 where  $D$  is the dimension of the attribute. Then the graph can be characterized by the feature  
 291 matrix  $X \in R^{N \times D}$ . The relation between each node is characterized by the adjacency matrix  
 292  $A = (a_{ij})_{N \times N}$ , where  $a_{ij} = 1$  if  $v_i$  and  $v_j$  are connected by an edge, otherwise  $a_{ij} = 0$ .  
 293 A degree matrix describes the number of edges connected to each node and can be  
 294 expressed in a diagonal matrix  $D = \text{diag}(d_1, d_2, \dots, d_N) \in R^{N \times N}$ ,  $d_i$  is the degree of  
 295 node  $v_i$  and calculated by  $d_i = \sum_{(v_i, v_j) \in E} a_{ij}$ . We normalize the adjacency matrix as  $\tilde{A} =$   
 296  $D^{-1}(A + I)$  where  $I \in R^{N \times N}$  is the identity matrix.

297 In this paper, we aim to train a Siamese graph encoder that embeds all nodes into the low-  
 298 dimension latent space in an unsupervised manner. The resultant latent embedding can then  
 299 be directly utilized to perform node clustering by clustering metrics such as K-means and  
 300 Leiden.

301

## 302 **The Overall Architecture of SGAE**

303 The overall architecture of SGAE consists of Graph Distortion, Siamese Encoders, Siamese  
 304 Decoders, and a reconstruction loss function.

305

306

307

## 308 **Graph Distortion**

309 We utilized two types of graph distortion including feature corruption and edge perturbation.

310 For feature corruption, which is the feature-level distortion, we apply Hadamard product to feature  
 311 matrix and a random noise matrix generated from a Gaussian distribution, i.e.,  $\tilde{X} = X \odot N$ ,  
 312 where  $\odot$  means the Hadamard product and  $N \sim N(1, 0.1)$ .

313 For edge perturbation, which is the structure-level distortion, we adopt two types of distortion, i.e.,  
 314 edge-removing and graph diffusion. For the edge removal, we generated a mask matrix  $M$   
 315 according to the similarity matrix by calculating the pair-wise cosine similarity in the latent space,  
 316 where the 10% of the lowest edges will be removed. The final adjacency matrix after edge  
 317 removal is

318

$$A^m = D^{-\frac{1}{2}}((A \odot M) + I)D^{-\frac{1}{2}}$$

319

320 In the graph diffusion treatment, we used Personalized PageRank to calculate the normalized

321 adjacency matrix into a graph diffusion matrix by following MVGRL method[28]:

322

$$A^d = \alpha \left( I - (1 - \alpha) \left( D^{-\frac{1}{2}}(A + I)D^{-\frac{1}{2}} \right) \right)^{-1}$$

323

where  $\alpha = 0.2$  as the teleport probability in a random walk.

324

325 **Siamese Encoders**

326 In order to reduce the utilization of space while learning richer cell representations, we

327 constructed two same encoders based on Siamese network structure to encode cell features.

328 The inputs of Siamese Encoders are graph  $G_1 = (X_1, A_m)$  and graph  $G_2 = (X_2, A_d)$ .329 And the output is the embedding matrix  $H$ . First, we use two parameter-shared encoders330 to encode graph  $G_1$  and graph  $G_2$  respectively, and generate embedding matrices  $H_1$  and331  $H_2$ . The encoder in the  $l$ -th layer can be formulated as:

332

$$H_1^{(l)} = \sigma \left( \widehat{A}_m H_1^{(l-1)} W_1^{(l)} \right) + \sigma \left( H_1^{(l-1)} W_2^{(l)} + b^{(l)} \right)$$

333

$$H_2^{(l)} = \sigma \left( \widehat{A}_d H_2^{(l-1)} W_1^{(l)} \right) + \sigma \left( H_2^{(l-1)} W_2^{(l)} + b^{(l)} \right)$$

334

where,  $\widehat{A}_m = D_m^{-\frac{1}{2}}(A_m + I)D_m^{-\frac{1}{2}}$ ,  $\widehat{A}_d = D_d^{-\frac{1}{2}}(A_d + I)D_d^{-\frac{1}{2}}$ ,  $D_m$  and  $D_d$  are degree matrices

335

of  $A_m$  and  $A_d$ ,  $I$  is the identity matrix,  $W_1^{(l)}$  and  $W_2^{(l)}$  are weight matrices of encoders in

336

the  $l$ -th layer,  $b^{(l)}$  is the bias vector of encoder in the  $l$ -th layer,  $\sigma$  is the non-linear

337

activate function, such as ReLU and Tanh. When layer  $l = 1$ ,  $H_1^{(l-1)} = X_1$ .

338

Ultimately, the decorrelated latent embeddings derived from two different views, namely

339

 $H_1$  and  $H_2$ , are merged using a linear combination operation. This amalgamation

340

produces clustering-focused latent embeddings that can be effectively employed for

341

clustering purposes, particularly through the utilization of the K-means algorithm.

342

343 **Siamese Decoders**

344

For SGAE, we construct a decoder based on graph convolutional neural networks, while

345

reconstructing feature embeddings and adjacency matrices. The input is the embedding matrix

346  $H$ , and the output is the original feature matrix  $X$  and the adjacency matrix  $A$ . Firstly,  
 347 we use the graph convolutional neural network to decode the embedding  $H$  to generate a  
 348 feature matrix  $\hat{H}$ , and the calculation formula of the  $k$  layer decoder is as follows:

$$349 \quad H^{(k)} = \sigma \left( D^{-\frac{1}{2}}(A + I)D^{-\frac{1}{2}}H^{(k-1)}W^{(k)} \right)$$

350 where  $D$  is the degree matrix of the matrix  $A$ , and  $W^{(k)}$  is the parameter matrix of the  
 351  $k$ -th layer of the decoder. Then, taking inner product computation between the  
 352 embedding matrix  $H$  and its transpose to generate the adjacency matrix  $\hat{A}$ .

353

### 354 **Reconstruction Loss Function**

355 Finally, we calculate the feature matrix reconstruction loss  $L_{REC-F}$ , the calculation  
 356 formula is as follows:

$$357 \quad L_{REC-F} = \frac{1}{2N} \left\| AX - \hat{H} \right\|_F^2$$

358 Calculate the adjacency matrix reconstruction loss  $L_{REC-A}$ , the calculation formula is as  
 359 follows:

$$360 \quad L_{REC-A} = \frac{1}{2N} \left\| A - \hat{A} \right\|_F^2$$

361

362 The reconstruction loss  $L_{REC}$  is the sum of the feature matrix reconstruction loss and the  
 363 adjacency matrix reconstruction loss, and the calculation formula is as follows:

$$364 \quad L_{REC} = L_{REC-F} + L_{REC-A}$$

365

### 366 **Redundant Reduction Module**

367 In order to eliminate redundant information in node embedding and generate distinguishable  
 368 embeddings for each node, the present invention designs a de-redundancy module, which  
 369 eliminates redundant information from two levels: node level and feature level:

$$370 \quad S_N = \frac{H_1 H_2^T}{\|H_1\| \|H_2\|}$$

$$371 \quad S_F = \frac{Z_1 Z_2^T}{\|Z_1\| \|Z_2\|}$$

$$372 \quad L_{RR} = L_{RR-N} + L_{RR-F}$$

373



### 374 **Clustering Guidance Module**

375 In order to effectively learn the feature embedding related to the clustering task, the  
376 present invention designs a clustering guidance module. Firstly, we pre-train the model, and  
377 use K-means to cluster the generated node embeddings. Secondly, we construct a  
378 clustering guidance loss  $L_C$  according to the node embedding matrix and the clustering  
379 result of the previous step: a) Compute the soft assignment matrix  $Q$  for all nodes and pre-  
380 trained cluster centers using the Student's  $t$  distribution. b) Generate the target distribution  
381 matrix  $P$  according to the soft allocation matrix  $Q$ , the element  $p_{ij}$  of the  $i$  row  $j$   
382 column is calculated by the following formula:

$$383 \quad p_{ij} = \frac{q_{ij}^2 / \sum_i q_{ij}}{\sum_{j'} (q_{ij'}^2 / \sum_i q_{ij'})}$$

384 Then compute the clustering guidance loss  $L_C$  using the KL divergence from the soft  
385 assignment, the target distribution and the pretrained soft assignment.

386 During training, the model is optimized by minimizing the loss function:

$$387 \quad L = L_{REC} + L_C + L_{RR}$$

388 After the model training is completed, the main flow of data in the model inference  
389 process is as follows: firstly, the model is used to obtain the low-dimensional feature  
390 embedding  $H$  of cells, and then based on the learned embedding, K-means is used for  
391 clustering, and finally the cluster labels of all cells are obtained.

392

### 393 **Clustering Refinement**

394 SGAE also incorporates an optional clustering refinement step. During this step, SGAE analyzes  
395 the domain assignment of each spot and its neighboring spots. Specifically, for a given spot, the  
396 label that appears most frequently among its surrounding spots is assigned to that spot. The  
397 clustering refinement step was exclusively performed for the human DLPFC 10x Visium data.

398

### 399 **Performance Evaluation**

400 We use five indices to evaluate the quality of the clustering results: Adjusted Rand Index (ARI),  
401 Normalized Mutual Information (NMI), Fowlkes-Mallows Index (FMI), Adjusted  
402 Mutual\_Infomation (AMI), and Moran's Index. These indices provide different perspectives on

403 the clustering performance. ARI measures the similarity of predicted types in the clusters, with a  
 404 range from -1 to 1. NMI measures the relationship between variables and is normalized to a range  
 405 of [0,1]. FMI calculates the geometric mean of pairwise precision and recall, also ranging from 0  
 406 to 1. AMI measures the similarity between the cluster assignments obtained from a clustering  
 407 algorithm and the ground truth cluster assignments. The Moran's Index is used to assess spatial  
 408 autocorrelation in the clustering results. Together, these indices offer a comprehensive evaluation  
 409 of the clustering quality across various aspects.

410 Here are formulas and function APIs used to implement the indices.

411 ARI: `sklearn.metrics.adjusted_rand_score`

$$412 \quad ARI = \frac{(TP + TN)}{C_N^2} \quad (N = \text{samples})$$

413 NMI: `sklearn.metrics.normalized_mutual_info_score`

$$414 \quad MI(X, Y) = \sum_{i=1}^{|X|} \sum_{j=1}^{|Y|} P(i, j) \log \left( \frac{P(i, j)}{P(i)P(j)} \right)$$

$$415 \quad H(X) = - \sum_{i=1}^{|X|} P(i) \log(P(i)); H(Y) = - \sum_{j=1}^{|Y|} P(j) \log(P(j))$$

$$416 \quad NMI(X, Y) = \frac{2MI(X, Y)}{H(X) + H(Y)}$$

417 FMI: `sklearn.metrics.fowlkes_mallows_score`

$$418 \quad FMI = TP / \text{sqrt}((TP + FP) * (TP + FN))$$

419 AMI: `sklearn.metrics.adjusted_mutual_info_score`

$$420 \quad AMI(X, Y) = \frac{MI(X, Y) - E\{MI(X, Y)\}}{1/2(H(X) + H(Y)) - E\{MI(X, Y)\}}$$

421 Moran's I: `scanpy.metrics.morans_i`

$$422 \quad E[I] = -\frac{1}{n-1}; V[I] = E[I^2] - E[I]^2; z_i = (I - E[I]) / \sqrt{V[I]}$$

$$423 \quad S_0 = \sum_{i=1}^n \sum_{j=1}^n \omega_{i,j}$$

$$424 \quad I = \frac{n \sum_{i=1}^n \sum_{j=1}^n \omega_{i,j} z_i z_j}{S_0 \sum_{i=1}^n z_i^2}$$

425

## 426 **Data Preprocessing**

427 SGAE utilizes transcriptome-wide gene expression profiles with spatial coordinates as

428 input. The raw gene counts per spot are first normalized to the total counts per cell and  
429 then scaled through log-transformation. In the case of 3D Drosophila datasets, we did not  
430 employ any multi-slice integration method as there was little batch effect observed from  
431 the UMAP result. Principal component analysis (PCA) is then conducted on the gene  
432 expression data using the *sc.pp.pca()* function, and the top 50 principal components per  
433 spot are subsequently utilized as the default expression feature.

434

435 **Identifying differentially expressed genes.** Wilcoxon test implemented in SCANPY [29] is  
436 used to calculate differentially expressed genes for each spatial domain Benjamin-Hochberg  
437 adjustment correlation via *sc.tl.rank\_genes\_groups()*.

438

#### 439 **Spatial trajectory inference**

440 We employed the PAGA algorithm [30] implemented in the SCANPY package to depict spatial  
441 trajectory. The PAGA trajectory and PAGA tree were inferred by the *scanpy.tl.paga()* function  
442 based on cell embedding generated by SGAE. Furthermore, *scanpy.tl.dpt()* was applied to  
443 estimate the pseudo time as well. To compare the performance of each clustering method with  
444 embedding, we calculate trajectory and pseudo time using methods above with same parameters  
445 settings.

446

#### 447 **Availability of supporting source code and requirements**

448 Project name: SGAE

449 Project home page: <https://github.com/STOmics/SGAE/>

450 Operating system: Linux

451 Programming language: Python

452 License: MIT license

453 RRID: SCR\_024803

454

#### 455 **Data Availability**

456 Supporting data sets for this article are available via following databases: human

457 dorsolateral prefrontal cortex 10x Visium dataset from spatialLIBD[31], mouse cortex

458 MERFISH dataset from Brain Image Library[32], mouse gastrulation seqFISH dataset  
459 from SpatialMouseAtlas[21], mouse olfactory bulb SLIDE-seq v2 dataset from Single  
460 Cell PORTAL[33], liver cancer Stereo-seq dataset and 3D Drosophila Stereo-seq  
461 dataset from CNGBdb[34], and adult mouse brain Stereo-seq dataset from  
462 Zenodo[35]. An archival version of SGAE can also be accessed in Software Heritage[36].

463

## 464 **Abbreviations**

465 ST: spatial transcriptomics, MERFISH: Multiplexed Error-Robust Fluorescence in situ  
466 Hybridization, seqFISH: sequential fluorescence in situ hybridization, scRNA-Seq: single-cell  
467 RNA sequencing, GCN: graph convolution network, GNN: graph neural network, DCRN: Dual  
468 Correlation Reduction Network, VGAE: Variational Graph Autoencoder, SNN: spatial neighbor  
469 network, UMAP: Uniform Manifold Approximation and Projection, KNN: K-nearest neighbors,  
470 ARI: Adjusted Rand Index, NMI: Normalized Mutual Information, FMI: Fowlkes-Mallows Index,  
471 DLPFC: dorsolateral prefrontal cortex, MI: Moran's Index.

472

## 473 **Funding**

474 This work is supported by National Natural Science Foundation for Young Scholars of China  
475 (32300526) and National Key R&D Program of China (2022YFC3400400)

476

## 477 **Authors' Contributions**

478 S.F. and Y.Z. conceived and designed the study. W.J., L.C., C.Y. and Y.R. proposed the SGAE  
479 model. L.C., L.H., C.Y., and Y.J. performed the data analysis. T.X. helped with the 3D  
480 reconstruction analysis. M.L. X.X, and Y.L. participated in the study discussions. L.C., L.H.,  
481 C.Y., and S.F. wrote the manuscript.

482

## 483 **Competing Interests**

484 All authors declare no conflicts of interest in regard to this manuscript.

485

## 486 **ACKNOWLEDGEMENTS**

487 We thank Lidong Guo, Xiaobin Liu for their help to the manuscript. This work is part of the

488 “SpatioTemporal Omics Consortium” (STOC) paper package. A list of STOC members is  
489 available at: <http://sto-consortium.org>. We acknowledge the Stomics Cloud platform to provide  
490 convenient ways for analyzing spatial omics datasets. We acknowledge the CNGB Nucleotide  
491 Sequence Archive (CNSA) of China National GeneBank DataBase (CNGBdb) for maintaining the  
492 MOSTA and Flysta3D database.

493

## 494 **References**

- 495 1. Park HE, Jo SH, Lee RH, Macks CP, Ku T, Park J, et al. Spatial Transcriptomics: Technical  
496 Aspects of Recent Developments and Their Applications in Neuroscience and Cancer  
497 Research. *Adv Sci (Weinh)*. 2023;10 16:e2206939. doi:10.1002/advs.202206939.
- 498 2. Larsson L, Frisen J and Lundeberg J. Spatially resolved transcriptomics adds a new dimension  
499 to genomics. *Nat Methods*. 2021;18 1:15-8. doi:10.1038/s41592-020-01038-7.
- 500 3. Chen KH, Boettiger AN, Moffitt JR, Wang S and Zhuang X. RNA imaging. Spatially  
501 resolved, highly multiplexed RNA profiling in single cells. *Science*. 2015;348 6233:aaa6090.  
502 doi:10.1126/science.aaa6090.
- 503 4. Shah S, Takei Y, Zhou W, Lubeck E, Yun J, Eng CL, et al. Dynamics and Spatial Genomics  
504 of the Nascent Transcriptome by Intron seqFISH. *Cell*. 2018;174 2:363-76 e16.  
505 doi:10.1016/j.cell.2018.05.035.
- 506 5. Rodriques SG, Stickels RR, Goeva A, Martin CA, Murray E, Vanderburg CR, et al. Slide-seq:  
507 A scalable technology for measuring genome-wide expression at high spatial resolution.  
508 *Science*. 2019;363 6434:1463-7. doi:10.1126/science.aaw1219.
- 509 6. Stahl PL, Salmen F, Vickovic S, Lundmark A, Navarro JF, Magnusson J, et al. Visualization  
510 and analysis of gene expression in tissue sections by spatial transcriptomics. *Science*.  
511 2016;353 6294:78-82. doi:10.1126/science.aaf2403.
- 512 7. Chen A, Liao S, Cheng M, Ma K, Wu L, Lai Y, et al. Spatiotemporal transcriptomic atlas of  
513 mouse organogenesis using DNA nanoball-patterned arrays. *Cell*. 2022;185 10:1777-92 e21.  
514 doi:10.1016/j.cell.2022.04.003.
- 515 8. Bressan D, Battistoni G and Hannon GJ. The dawn of spatial omics. *Science*. 2023;381  
516 6657:eabq4964. doi:10.1126/science.abq4964.
- 517 9. Burgess DJ. Spatial transcriptomics coming of age. *Nat Rev Genet*. 2019;20 6:317.  
518 doi:10.1038/s41576-019-0129-z.
- 519 10. Long Y, Ang KS, Li M, Chong KKL, Sethi R, Zhong C, et al. Spatially informed clustering,  
520 integration, and deconvolution of spatial transcriptomics with GraphST. *Nat Commun*.  
521 2023;14 1:1155. doi:10.1038/s41467-023-36796-3.
- 522 11. Li J, Chen S, Pan X, Yuan Y and Shen H-B. Cell clustering for spatial transcriptomics data  
523 with graph neural networks. *Nature Computational Science*. 2022;2 6:399-408.  
524 doi:10.1038/s43588-022-00266-5.
- 525 12. Hu J, Li X, Coleman K, Schroeder A, Ma N, Irwin DJ, et al. SpaGCN: Integrating gene  
526 expression, spatial location and histology to identify spatial domains and spatially variable  
527 genes by graph convolutional network. *Nat Methods*. 2021;18 11:1342-51.  
528 doi:10.1038/s41592-021-01255-8.

- 529 13. Dong K and Zhang S. Deciphering spatial domains from spatially resolved transcriptomics  
530 with an adaptive graph attention auto-encoder. *Nat Commun.* 2022;13 1:1739.  
531 doi:10.1038/s41467-022-29439-6.
- 532 14. Liu Y, Tu W, Zhou S, Liu X, Song L, Yang X, et al. Deep Graph Clustering via Dual  
533 Correlation Reduction. *arXiv e-prints.* 2021:arXiv:2112.14772.  
534 doi:10.48550/arXiv.2112.14772.
- 535 15. Kipf TN and Welling M. Variational Graph Auto-Encoders. *arXiv e-prints.*  
536 2016:arXiv:1611.07308. doi:10.48550/arXiv.1611.07308.
- 537 16. Page L, Brin S, Motwani R and Winograd T. The PageRank Citation Ranking : Bringing  
538 Order to the Web. In: *The Web Conference* 1999.pp. 567-574.
- 539 17. Zbontar J, Jing L, Misra I, LeCun Y and Deny SpJae-p. Barlow Twins: Self-Supervised  
540 Learning via Redundancy Reduction. *arXiv e-prints.* 2021. doi:10.48550/arXiv.2103.03230.
- 541 18. Lubeck E, Coskun AF, Zhiyentayev T, Ahmad M and Cai L. Single-cell in situ RNA profiling  
542 by sequential hybridization. *Nature Methods.* 2014;11 4:360-1. doi:10.1038/nmeth.2892.
- 543 19. Stickels RR, Murray E, Kumar P, Li J, Marshall JL, Di Bella DJ, et al. Highly sensitive spatial  
544 transcriptomics at near-cellular resolution with Slide-seqV2. *Nat Biotechnol.* 2021;39 3:313-9.  
545 doi:10.1038/s41587-020-0739-1.
- 546 20. Maynard KR, Collado-Torres L, Weber LM, Uyttingco C, Barry BK, Williams SR, et al.  
547 Transcriptome-scale spatial gene expression in the human dorsolateral prefrontal cortex. *Nat*  
548 *Neurosci.* 2021;24 3:425-36. doi:10.1038/s41593-020-00787-0.
- 549 21. Lohoff T, Ghazanfar S, Missarova A, Koulena N, Pierson N, Griffiths JA, et al. Integration of  
550 spatial and single-cell transcriptomic data elucidates mouse organogenesis. *Nat Biotechnol.*  
551 2022;40 1:74-85. doi:10.1038/s41587-021-01006-2.
- 552 22. Zhang M, Eichhorn SW, Zingg B, Yao Z, Cotter K, Zeng H, et al. Spatially resolved cell atlas  
553 of the mouse primary motor cortex by MERFISH. *Nature.* 2021;598 7879:137-43.  
554 doi:10.1038/s41586-021-03705-x.
- 555 23. Wu L, Yan J, Bai Y, Chen F, Zou X, Xu J, et al. An invasive zone in human liver cancer  
556 identified by Stereo-seq promotes hepatocyte–tumor cell crosstalk, local immunosuppression  
557 and tumor progression. *Cell Research.* 2023;33 8:585-603. doi:10.1038/s41422-023-00831-1.
- 558 24. Waltman L and Van Eck NJTEpjB. A smart local moving algorithm for large-scale  
559 modularity-based community detection. *The European physical journal B.* 2013;86:1-14.
- 560 25. Shen R, Liu L, Wu Z, Zhang Y, Yuan Z, Guo J, et al. Spatial-ID: a cell typing method for  
561 spatially resolved transcriptomics via transfer learning and spatial embedding. *Nat Commun.*  
562 2022;13 1:7640. doi:10.1038/s41467-022-35288-0.
- 563 26. Zhou X, Dong K and Zhang S. Integrating spatial transcriptomics data across different  
564 conditions, technologies, and developmental stages. *Nature Computational Science.*  
565 2022:2022.12.26.521888. doi:10.1101/2022.12.26.521888 %J bioRxiv.
- 566 27. Wang M, Hu Q, Lv T, Wang Y, Lan Q, Xiang R, et al. High-resolution 3D spatiotemporal  
567 transcriptomic maps of developing *Drosophila* embryos and larvae. *Dev Cell.* 2022;57  
568 10:1271-83 e4. doi:10.1016/j.devcel.2022.04.006.
- 569 28. Hassani K and Hosein Khasahmadi A. Contrastive Multi-View Representation Learning on  
570 Graphs. *arXiv e-prints.* 2020:arXiv:2006.05582. doi:10.48550/arXiv.2006.05582.
- 571 29. Wolf FA, Angerer P and Theis FJ. SCANPY: large-scale single-cell gene expression data  
572 analysis. *Genome Biol.* 2018;19 1:15. doi:10.1186/s13059-017-1382-0.

- 573 30. Wolf FA, Hamey FK, Plass M, Solana J, Dahlin JS, Göttgens B, et al. PAGA: graph  
574 abstraction reconciles clustering with trajectory inference through a topology preserving map  
575 of single cells. *Genome Biology*. 2019;20 1:59. doi:10.1186/s13059-019-1663-x.
- 576 31. Pardo B, Spangler A, Weber LM, Page SC, Hicks SC, Jaffe AE, et al. spatialLIBD: an  
577 R/Bioconductor package to visualize spatially-resolved transcriptomics data. *BMC Genomics*.  
578 2022 Jun 10;23(1):434. doi: 10.1186/s12864-022-08601-w.
- 579 32. Benninger K, Hood G, Simmel D, Tuite L, Wetzel AW, Ropelewski AJ, et al.  
580 Cyberinfrastructure of a Multi-Petabyte Microscopy Resource for Neuroscience Research. In:  
581 *PEARC '20: Practice and Experience in Advanced Research Computing 2020*.  
582 <https://doi.org/10.1145/3311790.3396653>
- 583 33. Single Cell Portal: an interactive home for single-cell genomics data. *bioRxiv*. 2023 Jul  
584 17:2023.07.13.548886. doi: 10.1101/2023.07.13.548886..
- 585 34. Chen FZ, You LJ, Yang F, Wang LN and Wei XFJH. CNGBdb: China National GeneBank  
586 DataBase. 2020;42 8:799-809.
- 587 35. Shen R, Liu L, Wu Z, Zhang Y, Yuan Z, Guo J, et al. Data from: Application of Spatial-ID to  
588 large field mouse brain hemisphere dataset measured by Stereo-seq. *Zenodo*, 2022.  
589 <https://doi.org/10.5281/zenodo.7340795>
- 590 36. Fang S, Cao L, Yang C, Hu L et al. (2023) SGAE: Deciphering spatial domains from spatially  
591 resolved transcriptomics with Siamese Graph Autoencoder (Version 1). [Computer software].  
592 Software Heritage,  
593 [https://archive.softwareheritage.org/browse/snapshot/19c3ac3c492b5b4c6aca5451eeea9efb52](https://archive.softwareheritage.org/browse/snapshot/19c3ac3c492b5b4c6aca5451eeea9efb52a3ad9d/directory/?origin_url=https://github.com/STOmics/SGAE)  
594 [a3ad9d/directory/?origin\\_url=https://github.com/STOmics/SGAE](https://archive.softwareheritage.org/browse/snapshot/19c3ac3c492b5b4c6aca5451eeea9efb52a3ad9d/directory/?origin_url=https://github.com/STOmics/SGAE)

595  
596  
597

## 598 **Figure legends**

599 **Figure 1. An overview of SGAE framework.** SGAE algorithm consists of three key modules.  
600 Firstly, the graph distortion module generates two distorted graphs by introducing both attribute  
601 and graph disturbances. Secondly, the encoder module generates two sets of representations for  
602 each sample. Thirdly, the redundant reduction module ensures that the same sample within the two  
603 distorted graphs has identical representations at both the feature and sample levels. Lastly, the  
604 discriminative representations are applied to clustering algorithms such as k-means to decipher  
605 spatial domains.

606 **Figure 2. SGAE exhibited high effectiveness and robustness in spatial domain exploration.**  
607 (A-D) Visualization of clustering results from SGAE, SpaGCN, GraphST, STAGATE, Leiden and  
608 annotation. (A) Human dorsolateral prefrontal cortex (DLPFC) 10x Visium dataset, (B) Mouse  
609 gastrulation seqFISH dataset, (C) Mouse cortex MERFISH dataset, (D) Mouse olfactory bulb  
610 SLIDE-seq v2 dataset. (E-G) Benchmark metrics comparison of SGAE against SpaGCN,

611 GraphST, STAGATE and Leiden. (E) Boxplot of ARI, FMI and NMI for 12 DLPFC 10x Visium  
612 datasets. (F) Mouse gastrulation seqFISH dataset, (G) Mouse cortex MERFISH dataset.

613 **Figure 3. SGAE unraveled spatial domains and provided discriminative representations.** (A)  
614 Visualization of human adult brain clustering results from SGAE, SpaGCN, STAGATE, CCST,  
615 and GraphST. (B) Subclustering results of DGGRC2, TEGLU24 and HBGLU from SGAE,  
616 SpaGCN, STAGATE, CCST, and GraphST. (C) Benchmark metrics comparison of SGAE against  
617 SpaGCN, STAGATE, CCST, and GraphST. (D) Boxplot of Moran's Index comparison of SGAE  
618 against SpaGCN, STAGATE, CCST, and GraphST. (E) UMAP visualization of embedding from  
619 SGAE, SpaGCN, STAGATE and GraphST. (F) Boxplot of ANOVA F score of pseudo-time  
620 calculated from embedding provided by PCA, CCST, STAGATE and GraphST.

621 **Figure 4. SGAE enhanced complex spatial domain dissection in 3D Drosophila Embryo.** (A) 2D  
622 visualization of Drosophila Embryo clustering results at different stages (E14-16, E16-18, and L1)  
623 from SGAE and STAligner. (B) Benchmark metrics comparison of SGAE, Leiden and STAligner.  
624 (C) 3D visualization of Drosophila Embryo. The first row showed the marker genes of Drosophila  
625 Embryo at different stages, while the last three rows displayed the meshes generated by SGAE,  
626 STAligner and Leiden respectively.

627 **Supplementary Figure 1. SGAE reached good performance on complex and heterogenous**  
628 **liver cancer sample.** (A) H&E staining of liver cancer sample. Manually added line indicate the  
629 border of tumor and healthy tissue. (B) Clustering result of SGAE and other methods. (C) Moran's  
630 Index of the clustering results of SGAE and other methods. (D) Spatial map of the expression of  
631 VIM (E) The most likely clusters associated with fibroblasts identified using SGAE and other  
632 methods, determined by the expression of VIM.

633 **Supplementary Figure 2. Less batch effect detected in 3D Drosophila embryos.** UMAP  
634 visualization of 3D Drosophila embryos. Left : color in cell type annotation, Right : color in slices  
635 of sample. (A) E14-16. (B) E16-18. (C) L1.

636



Figure 1

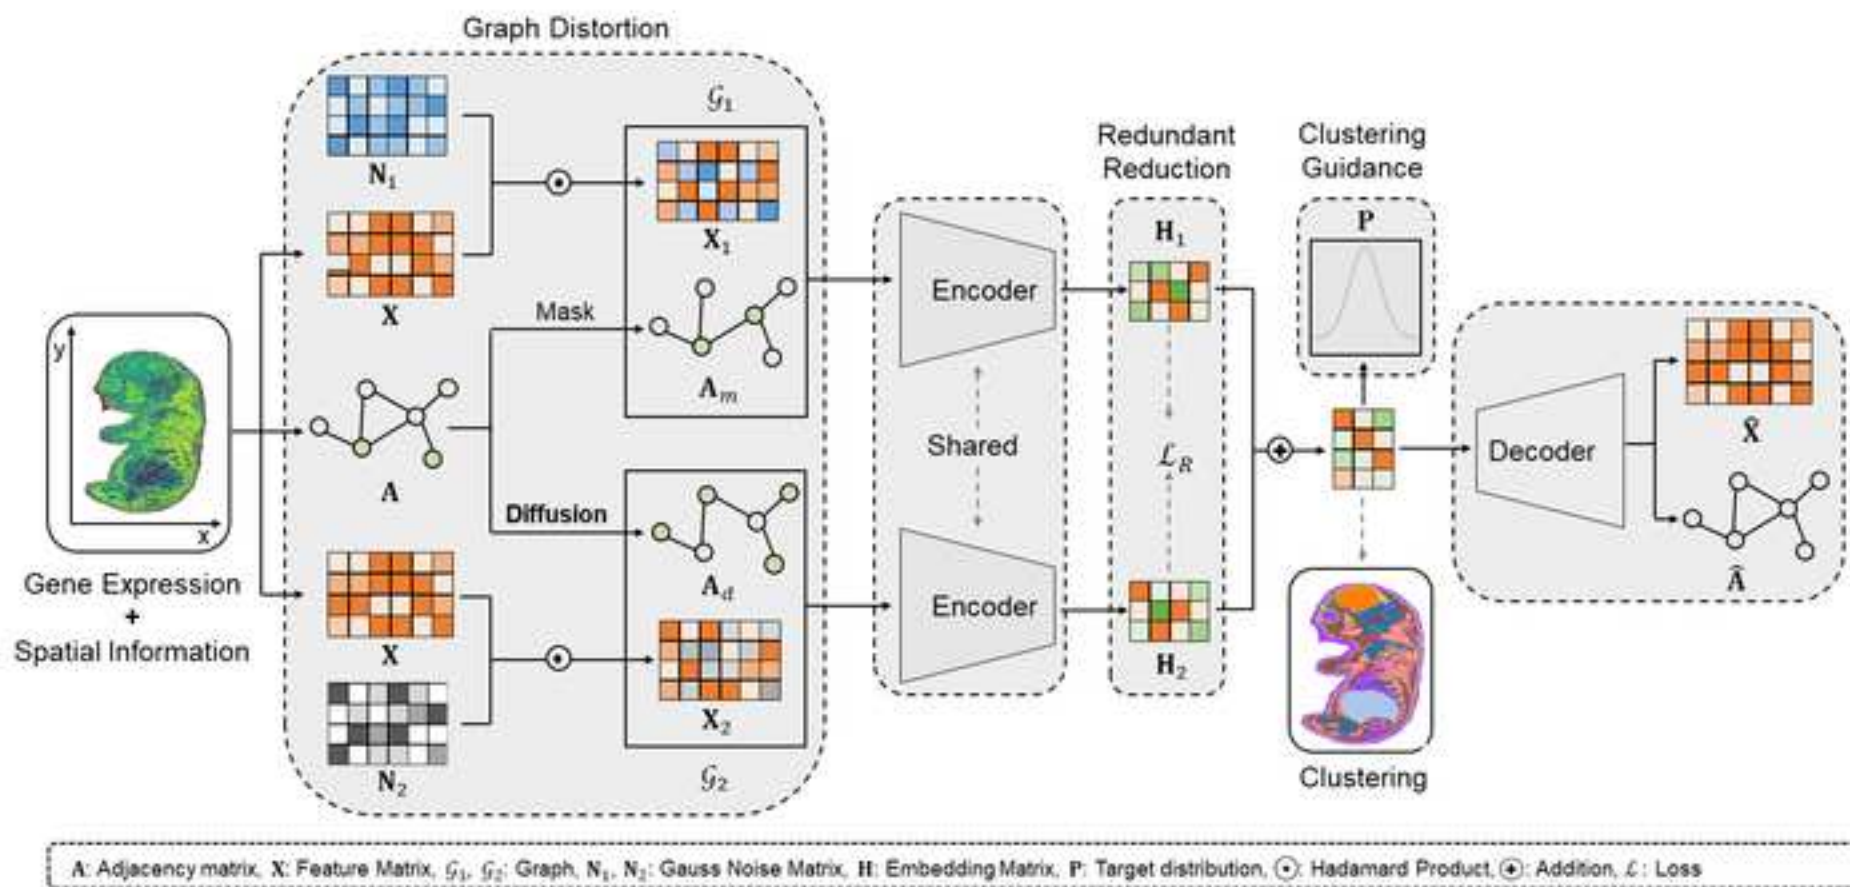

## Figure 2

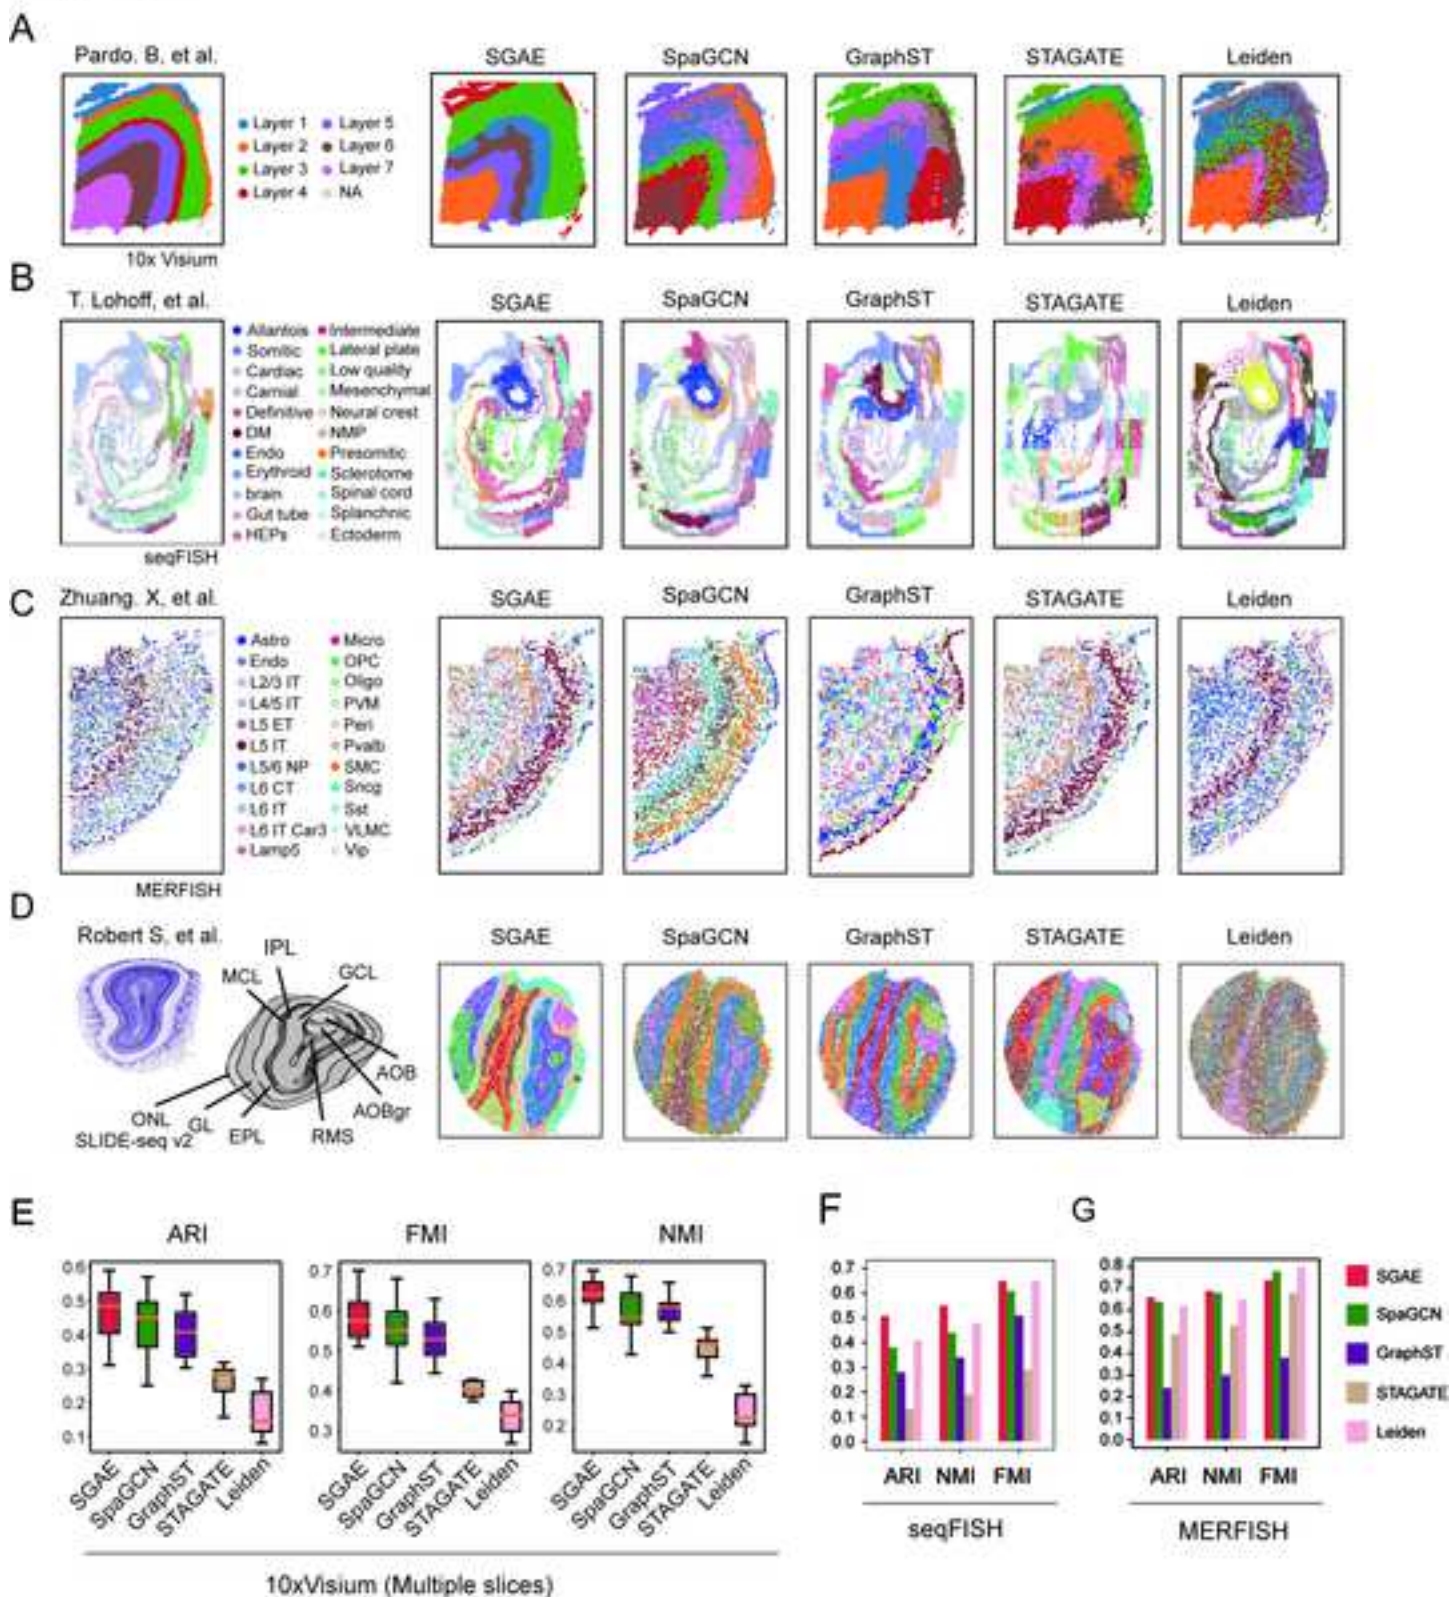



**Figure 4**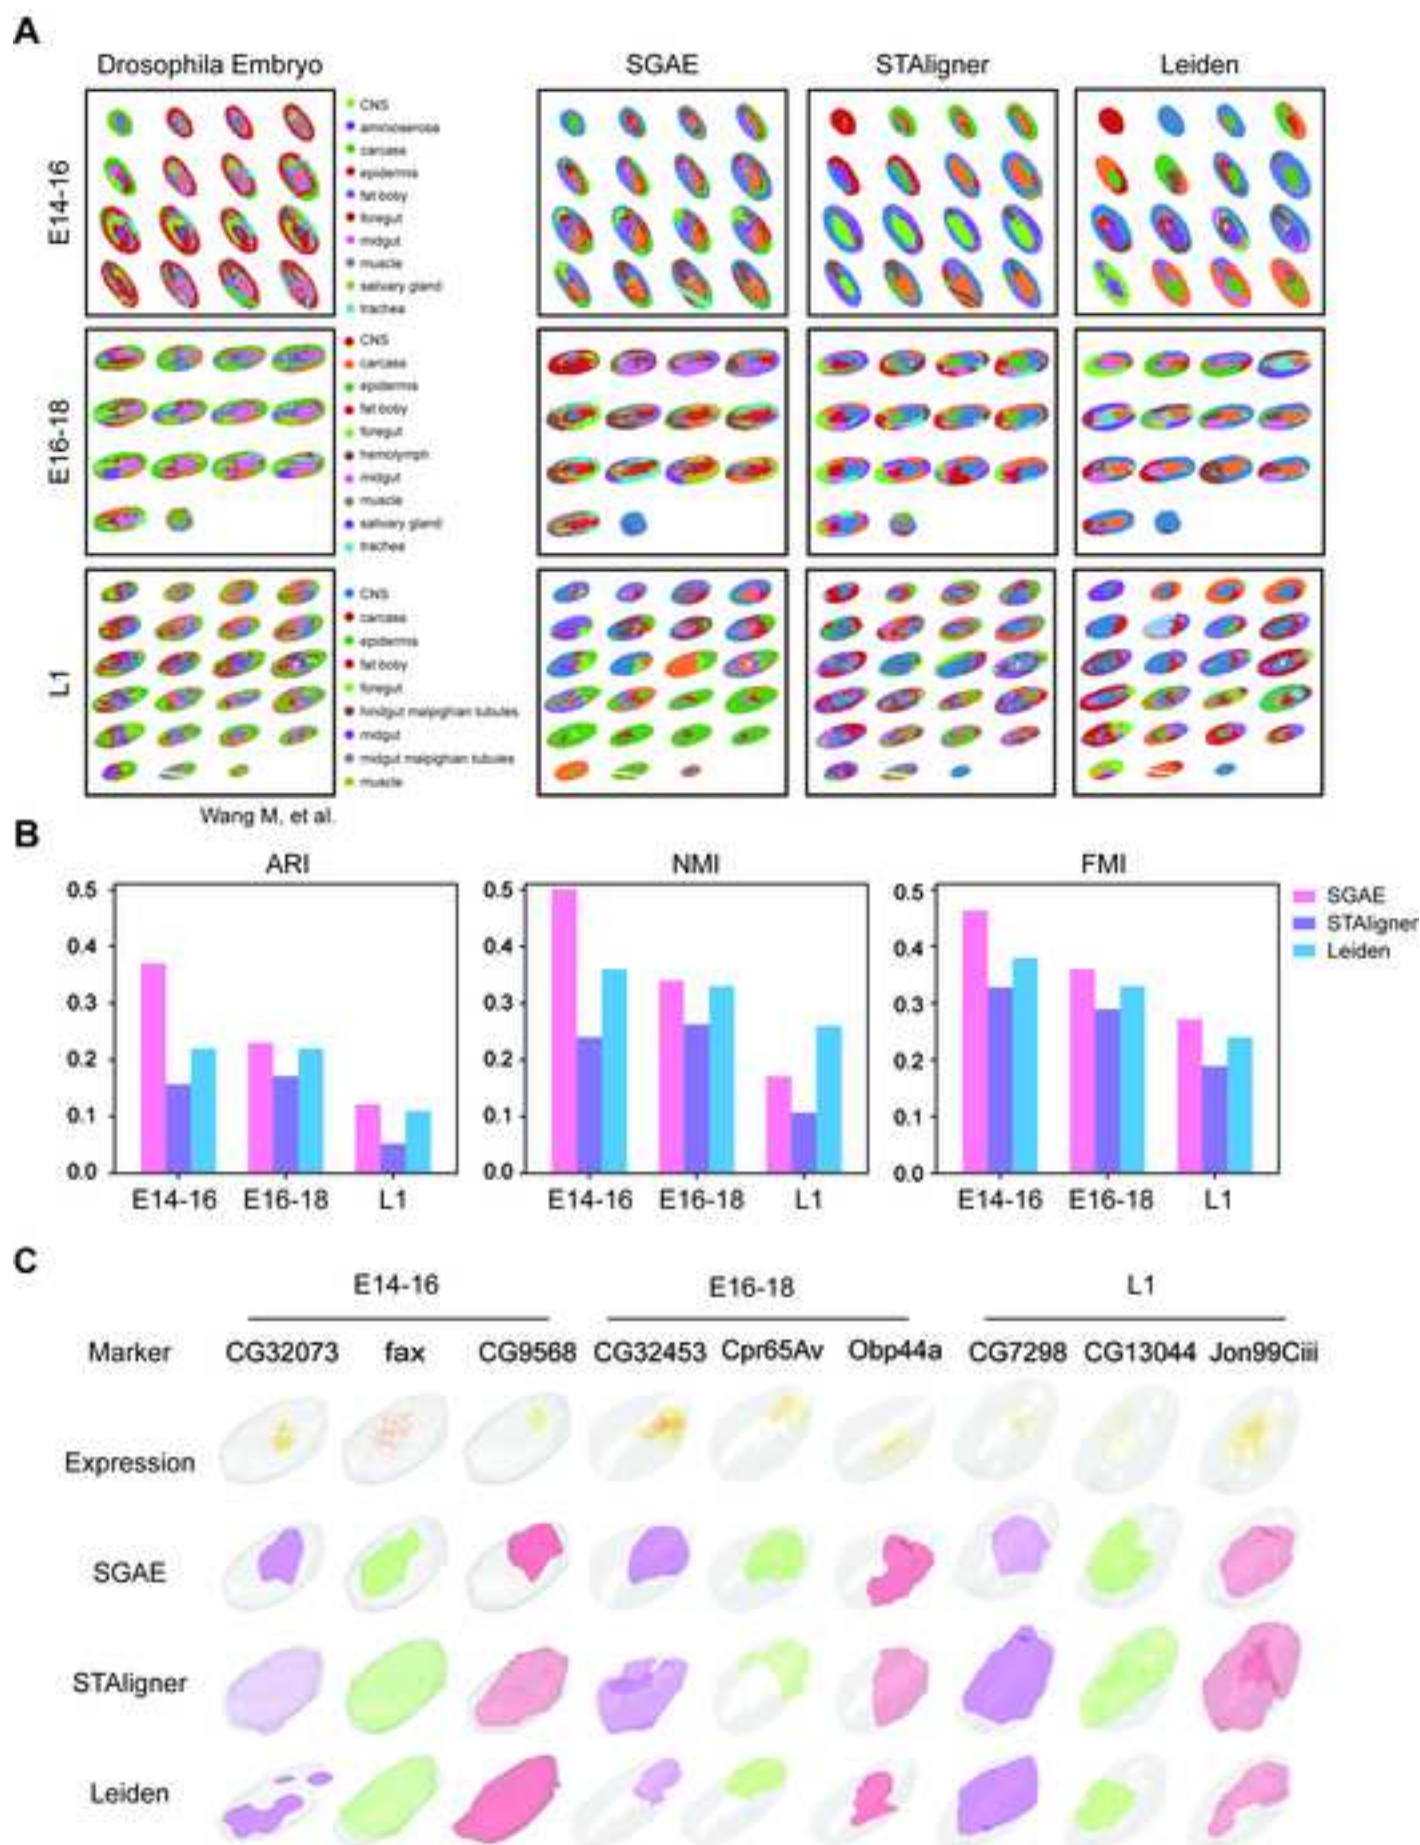

**Figure 3**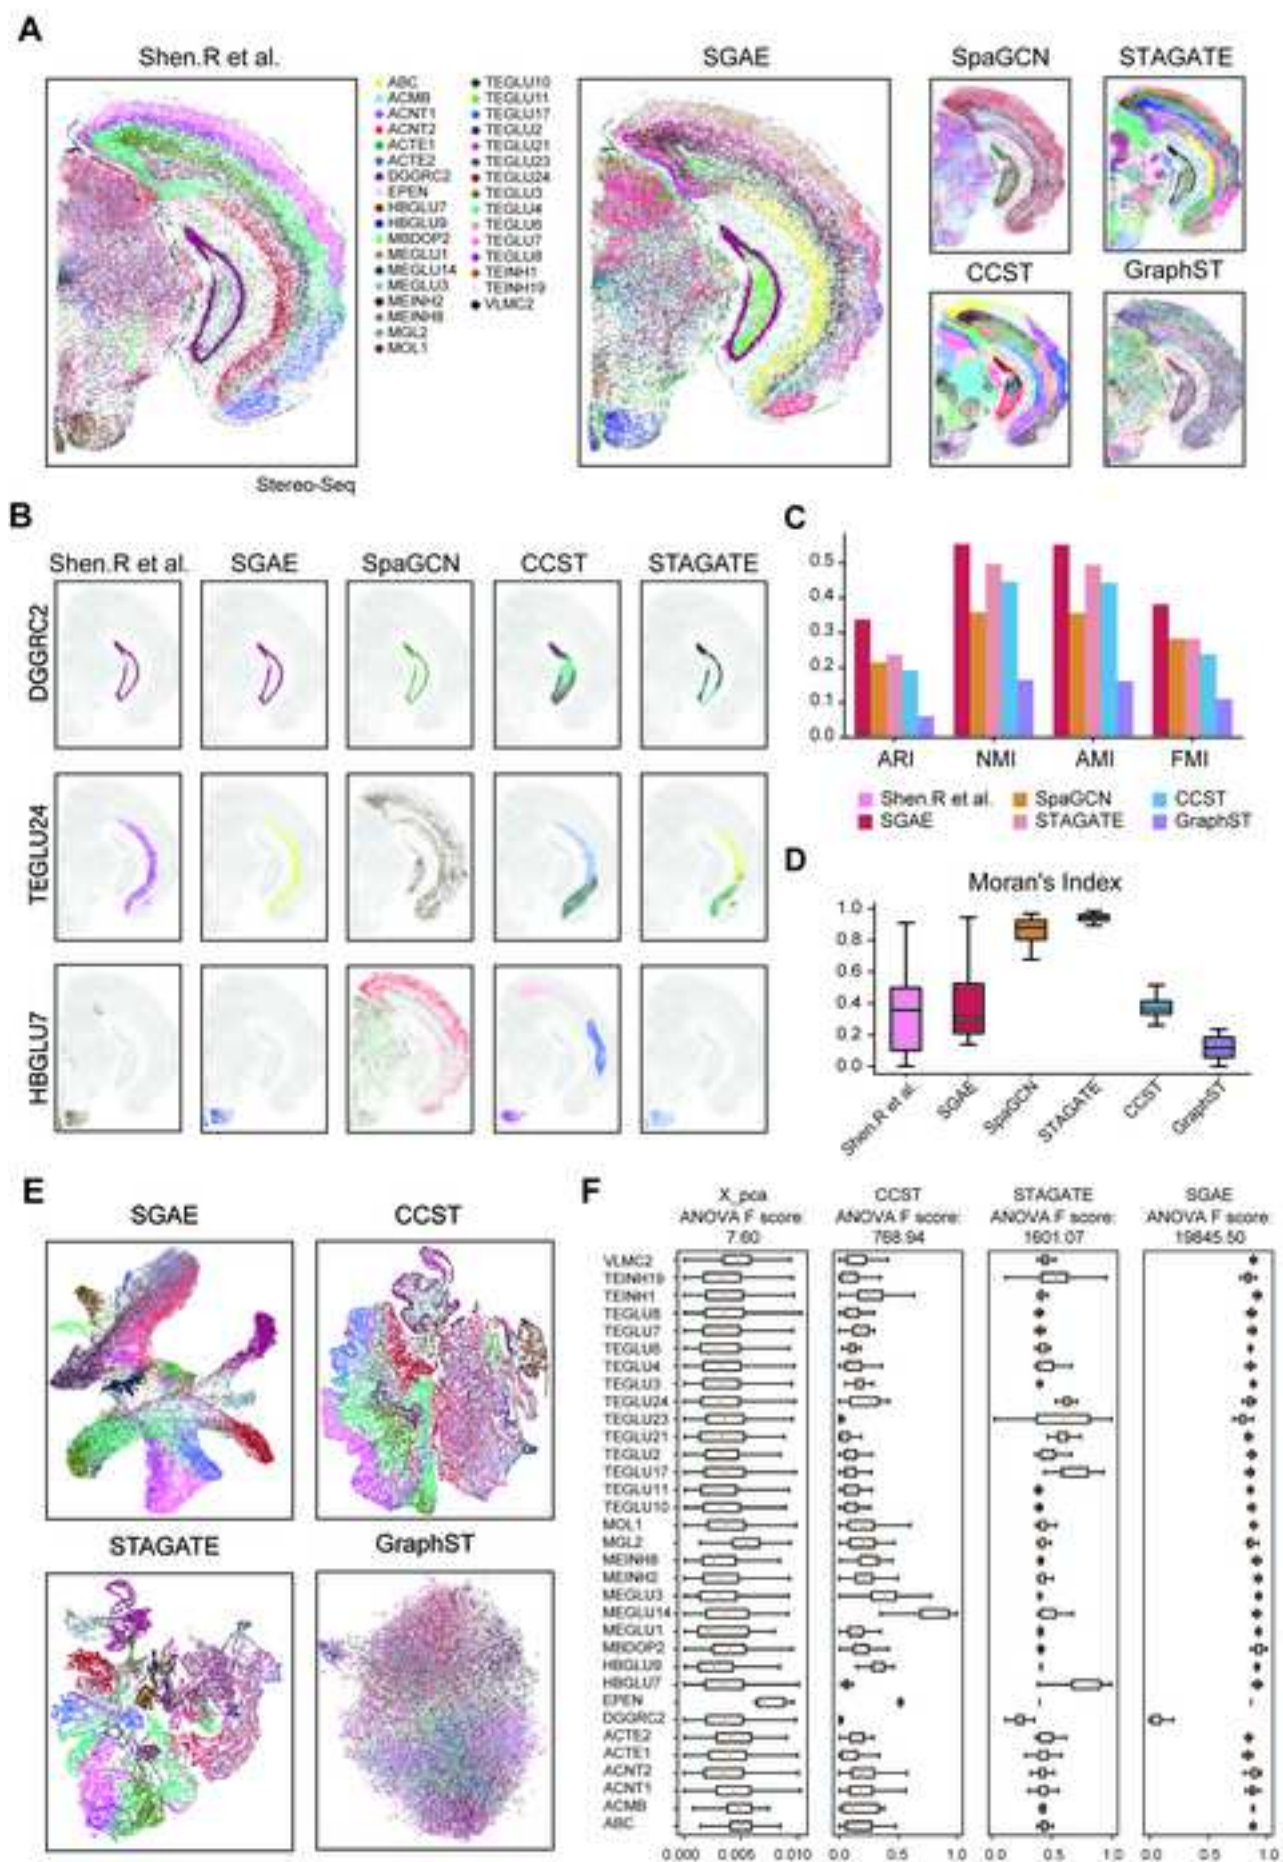



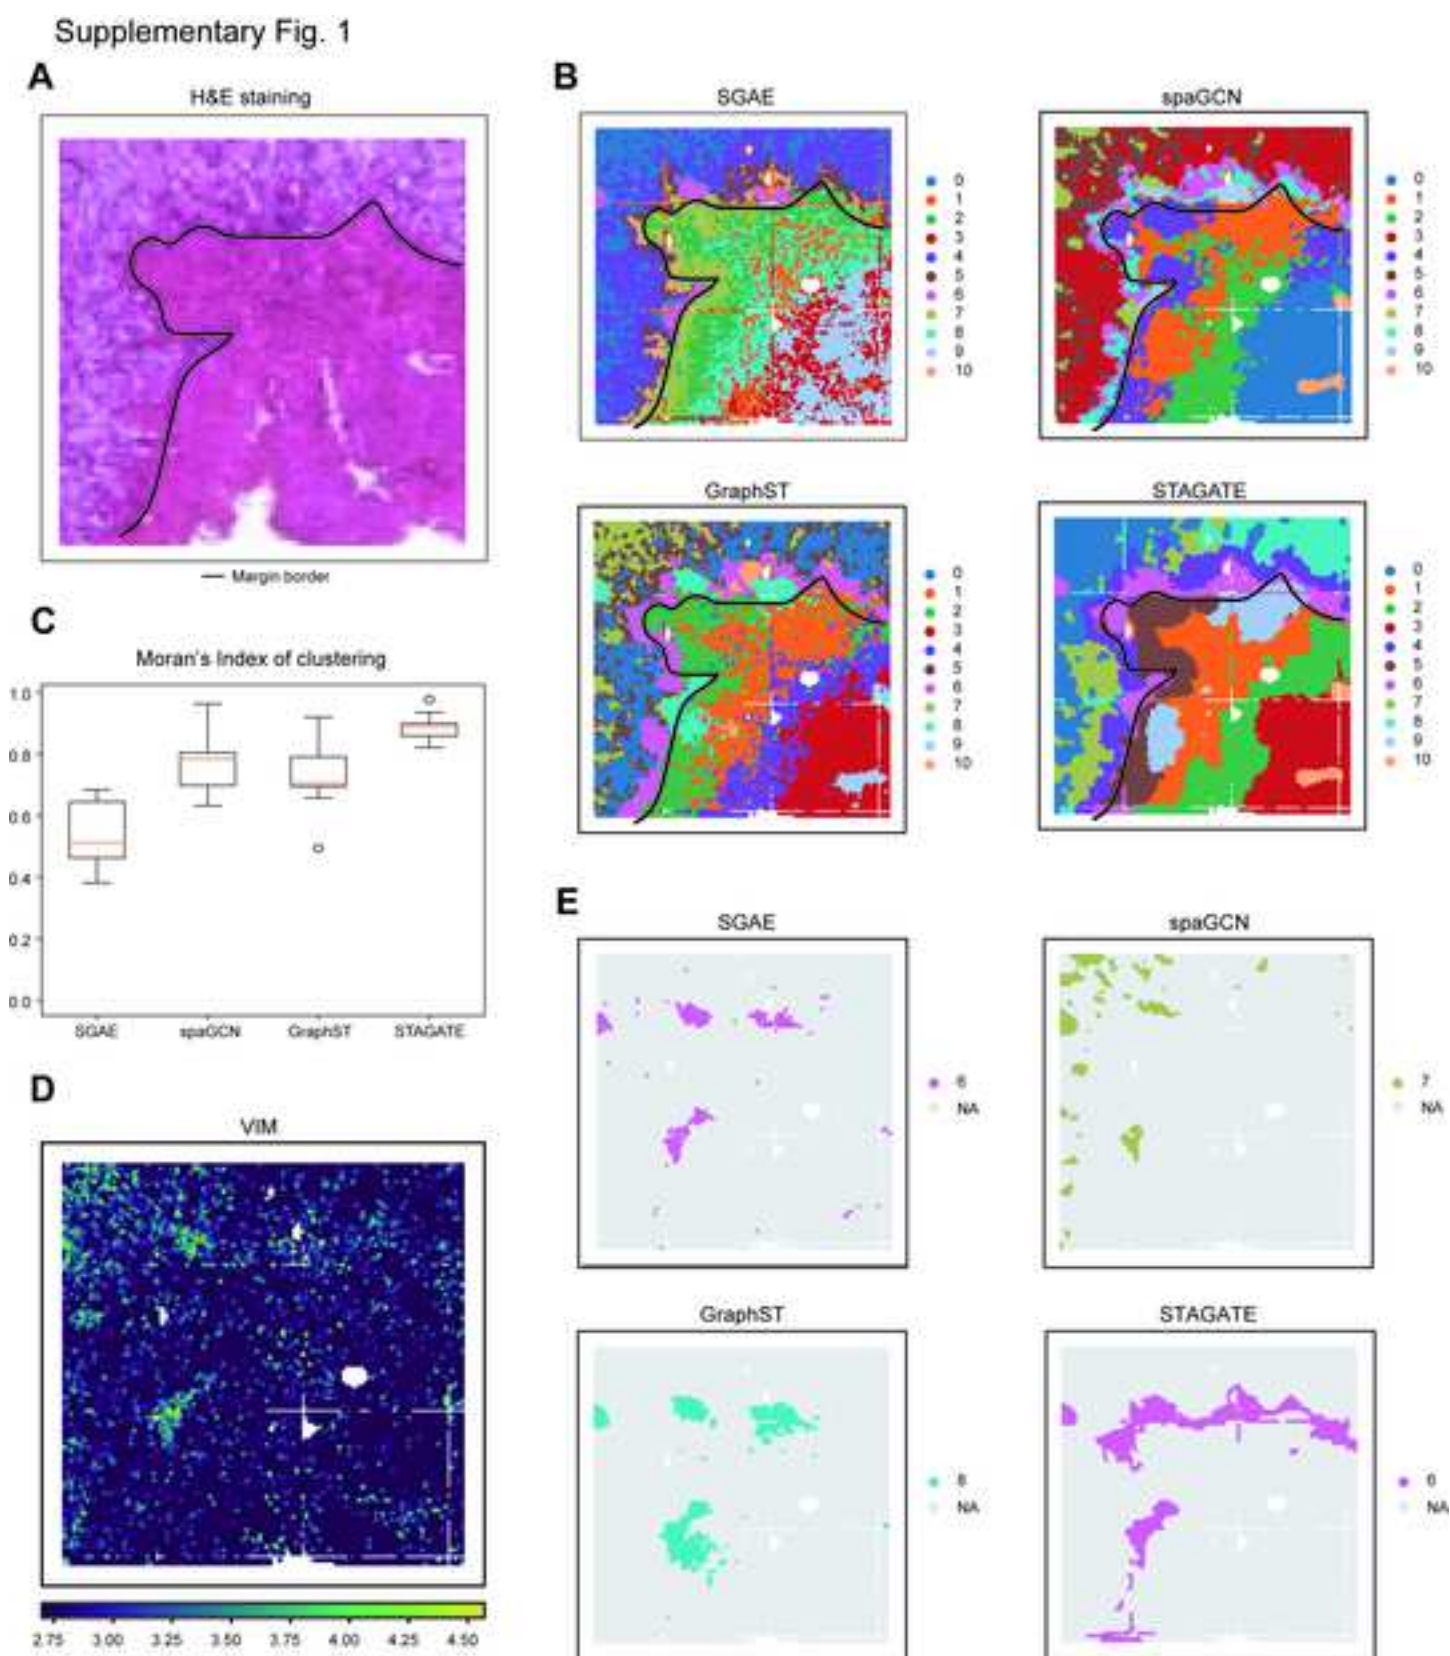

Supplementary Fig. 2

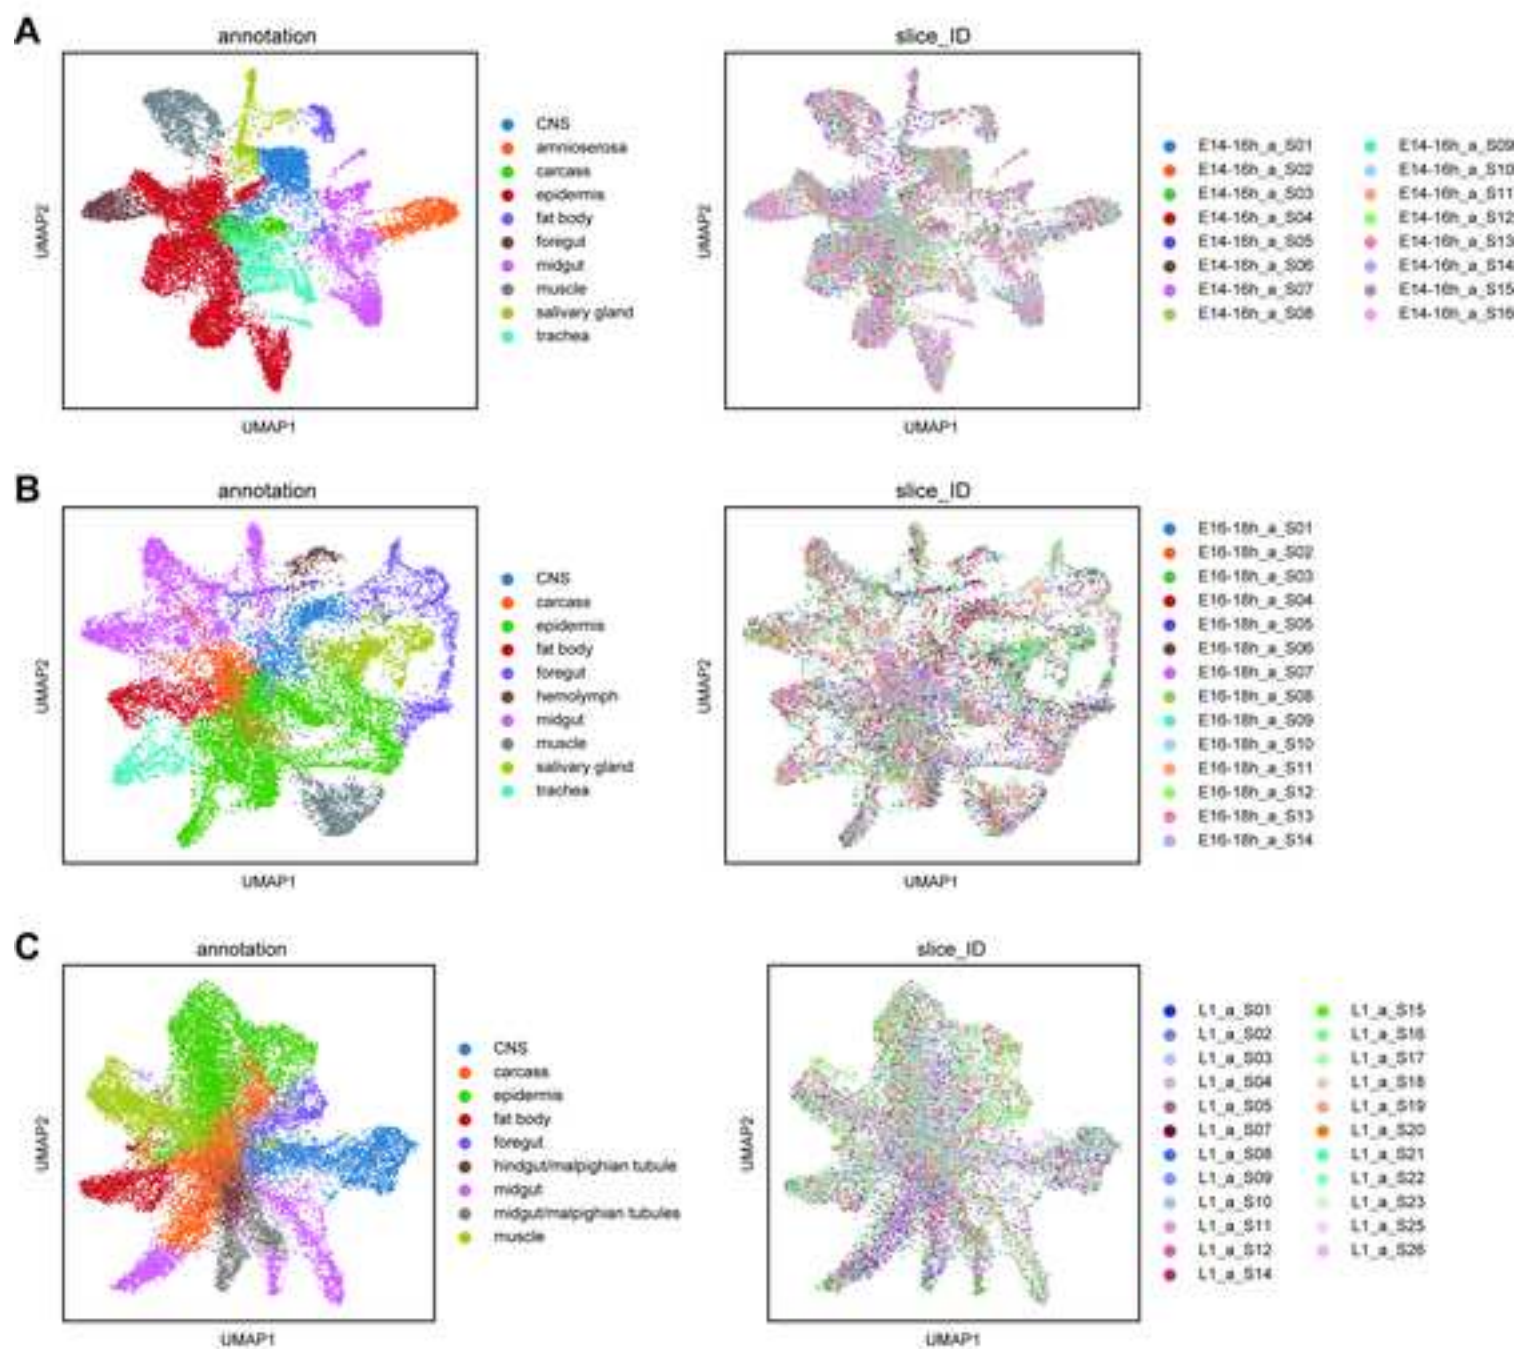

Dear Editor,

Thank you for handling our manuscript entitled "Deciphering spatial domains from spatially resolved transcriptomics with Siamese Graph Autoencoder" and providing us with an opportunity to revise our work. We are delighted to receive positive remarks from both the editors and reviewers regarding our study. We would also like to express our sincere appreciation for the constructive comments provided by both the editors and reviewers, which have greatly strengthened our work.

We are grateful to the editors for sharing the comments of all three reviewers with us. In this revision, we have diligently addressed all the suggested experiments proposed by reviewers. Please find our point-by-point responses to the editors' comments listed below.

Sincerely,

Shuangfang Fang

fangshuangfang@genomics.cn

Reviewer's comments:

Reviewer #1: This paper introduces SGAE, a novel method designed for the detection of spatial domains in spatial transcriptomics (ST). The authors utilize various public datasets and demonstrate that SGAE enhances representation discrimination, outperforming other spatial transcriptomics clustering software in clustering index evaluations. The study holds significant interest, as the application of SGAE has the potential to offer profound insights into complex biological systems.

**Response: We greatly appreciate the reviewer's positive remarks on our study and highly**

value the reviewer's comments about our study.

While the authors effectively showcase the efficacy and robustness of SGAE across various real datasets, it would be intriguing to assess SGAE's performance and compare it with other ST methods under different sequencing depths and clustering parameters. Additionally, a comparative analysis of maximum memory usage and runtime among various ST methods could provide valuable insights.

Response: We greatly appreciate the suggestions from the reviewers. To validate the robustness and accuracy of the SGAE algorithm, we conducted comprehensive tests on diverse datasets obtained from various ST methods. Importantly, we ensured that no special parameter adjustments were made during clustering process. The parameter table for testing on different datasets is also included in the Github repository (<https://github.com/STOmics/SGAE>).

Additionally, we have also performed statistical analysis on the memory usage and runtime of SGAE across different datasets (see **Table below**). In the architecture of SGAE, it involves pretrain models to ensure the clustering results, which may lead to the lower performance in terms of memory usage and runtime. However, based on the pretrain models designed in SGAE, the clustering results are more robust when SGAE applied on different datasets generated by different platforms (see Figure 2).



**Table GPU memory, memory and time consumptions of SGAE and alternative methods**

|              | GPU memory (Mb) |         |        |          |        | memory (Mb) |         |        |          |        | time (s) |         |        |          |        |
|--------------|-----------------|---------|--------|----------|--------|-------------|---------|--------|----------|--------|----------|---------|--------|----------|--------|
|              | SGAE            | GraphST | spaGCN | STA-GATE | Leiden | SGAE        | GraphST | spaGCN | STA-GATE | Leiden | SGAE     | GraphST | spaGCN | STA-GATE | Leiden |
| DLPFC_151507 | 3033            | 1903    | /      | 3009     | /      | 1656        | 3701    | 1048   | 2998     | 2527   | 2980     | 56      | 71     | 26       | 140    |
| DLPFC_151508 | 3703            | 2225    | /      | 3013     | /      | 1776        | 4951    | 825    | 3011     | 3217   | 3012     | 53      | 64     | 26       | 145    |
| DLPFC_151509 | 3033            | 2991    | /      | 3273     | /      | 2278        | 5908    | 1205   | 3008     | 3985   | 2906     | 64      | 83     | 29       | 171    |
| DLPFC_151510 | 3033            | 2991    | /      | 3169     | /      | 2287        | 6266    | 1153   | 3007     | 4710   | 2694     | 45      | 111    | 27       | 166    |
| DLPFC_151669 | 3708            | 3003    | /      | 2829     | /      | 2287        | 7263    | 772    | 3005     | 5181   | 2754     | 42      | 76     | 23       | 150    |
| DLPFC_151670 | 3033            | 3011    | /      | 2725     | /      | 2287        | 7761    | 878    | 2996     | 5722   | 2386     | 43      | 41     | 22       | 182    |
| DLPFC_151671 | 3033            | 3011    | /      | 3045     | /      | 2287        | 8271    | 1075   | 3016     | 6435   | 2214     | 31      | 81     | 26       | 189    |
| DLPFC_151672 | 3033            | 3085    | /      | 2977     | /      | 2287        | 9351    | 1048   | 3007     | 7072   | 2190     | 36      | 126    | 25       | 159    |
| DLPFC_151673 | 3033            | 3085    | /      | 2877     | /      | 1328        | 9851    | 983    | 3026     | 7602   | 2688     | 40      | 71     | 24       | 128    |
| DLPFC_151674 | 3033            | 3085    | /      | 2977     | /      | 1336        | 10386   | 734    | 3024     | 8202   | 2226     | 40      | 81     | 25       | 156    |
| DLPFC_151675 | 3033            | 3085    | /      | 2809     | /      | 1366        | 10785   | 1114   | 3026     | 8798   | 2406     | 40      | 39     | 22       | 152    |
| DLPFC_151676 | 3033            | 3275    | /      | 2777     | /      | 1336        | 11852   | 707    | 3029     | 9352   | 2590     | 40      | 59     | 23       | 140    |
| Merfish      | 6272            | 1544    | /      | 1710     | /      | 1154        | 1228    | 425    | 2908     | 8328   | 3530     | 46      | 42     | 11       | 14     |
| seqfish      | 12272           | 4772    | /      | 3452     | /      | 2164        | 7065    | 8519   | 13434    | 8349   | 14690    | 153     | 486    | 21       | 31     |
| slide-seq    | 3275            | 6514    | /      | 8876     | /      | 3286        | 11192   | 12025  | 2979     | 13229  | 12486    | 701     | 538    | 101      | 160    |

In the "Results" section, enhancing the data description would contribute to a more compelling presentation.

**Response:** We are grateful for the reviewer's professional comments. We have added detailed data description in the "Results" section (Line 120-129, 192-194).

Please provide the explanations of error bars in the figure legends.

**Response:** We much appreciate the reviewer's careful reading. We have added detailed explanations of statistics in the figure legend.

Furthermore, it is recommended to standardize specialized terms, such as 'F-score,' for consistency throughout the paper.

**Response:** We thank the reviewer for his/her professional suggestion. We have checked and revised the manuscript thoroughly to ensure specialized terms consistency.

Reviewer #2: The paper entitled "Deciphering spatial domains from spatially resolved transcriptomics with Siamese Graph Autoencoder" by Lei Cao, et al. explores an innovative framework called SGAE for spatial domain identification in spatial transcriptomics (ST) data analysis. This framework addresses the limitations of existing methods by incorporating the power of Siamese Graph Autoencoder (SGAE) to improve representation discrimination. The article also highlights the potential of SGAE in enhancing the accuracy of identifying 3D *Drosophila* embryonic structures. Nevertheless, several significant concerns remain regarding the author's stated conclusion.

**Response:** We are deeply grateful for the reviewer's positive feedback regarding our study and genuinely appreciate the valuable comments and insights.

1. The author mentioned "GNN-based methods suffer from representation collapse, where in all spatial spots are projected onto a singular representation." and "SGAE mitigates the information correlation at the both sample and feature level, thus improving the represent

ation discrimination." However, the author did not provide enough evidence to demonstrate the ability of SGAE in solving representation collapse, nor did they prove that the GNN approach indeed leads to such problems. More analysis evidence required to support the role of SGAE in representation collapse. Additionally, it would be helpful to understand the impact of representation collapse on downstream bioinformatic analysis.

Response: We sincerely appreciate the reviewer's insightful concerns. In response to the comments, we conducted additional analyses and obtained further evidence to support the role of SGAE in mitigating representation collapse (Figure below). Heatmap of pairwise Pearson's correlation between center embedding of cell types illustrates a more discriminative embedding generated by SGAE compared to GAE (Graph Autoencoder) and AE (Autoencoder). Based on these findings, we provide empirical evidence that supports the ability of SGAE to mitigate representation collapse and improve representation discrimination.

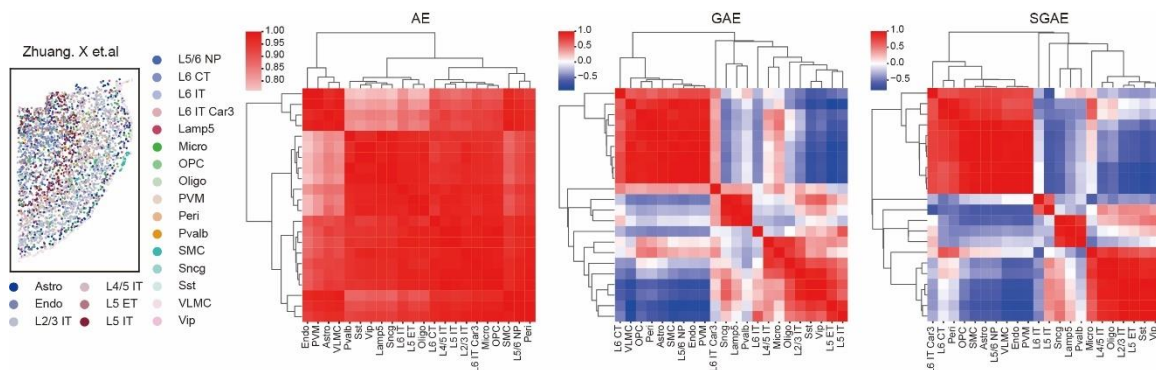

2. Did the Siamese architecture make a difference on the performance of spatial domain identification? Further ablation experiments are needed to demonstrate the effectiveness of each module in the SGAE architecture.

Response: We appreciate the reviewer's comment and agree that further ablation experiments would be valuable in assessing the effectiveness of SGAE architecture. We further compared the performance of the AE (Autoencoder) architecture, GAE (Graph

Autoencoder) architecture with the SGAE (Siamese Graph Autoencoder) architecture to evaluate the impact of the Siamese architecture on spatial domain identification. The results demonstrate that the SGAE architecture outperforms the GAE architecture in terms of spatial domain identification (Figure below). This suggests that the incorporation of the Siamese architecture in SGAE has a positive impact on the performance of spatial domain identification.

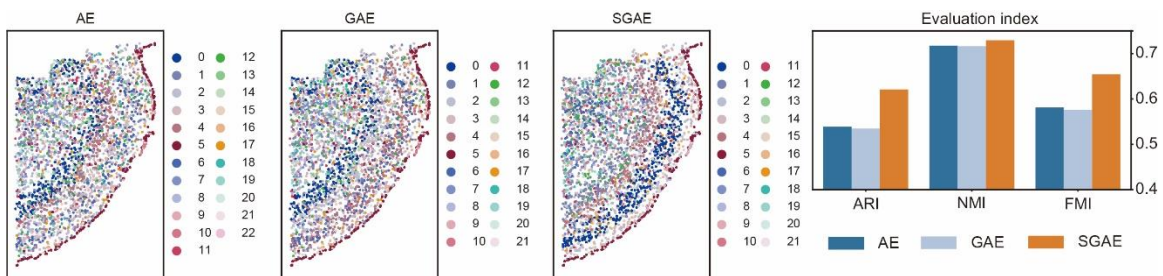

3. The author only analyzed the trajectory of one mouse brain sample. This is still far from proving that the embeddings generated by SGAE can exhibit better performance in downstream applications. Does the result of trajectory inference correspond to the actual biological development process?

Response: We much appreciate the reviewer's comments and acknowledge the limitations of our study in terms of analyzing the pseudo-time of mouse brain sample among cell types. To further explain the rationality the pseudo-time result based on embedding of SGAE, we analysis the pseudo-time of cell types along a developmental trajectory from TEGLU24 to TEGLU7. As a result, SGAE successfully revealed the sustained upward trend of pseudo-time, providing evidence of the performance and utility of SGAE in capturing the underlying developmental processes.

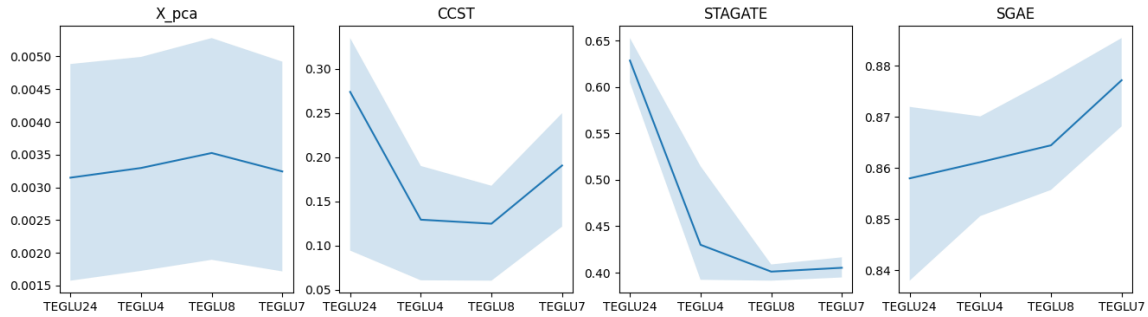

4. Did author adapt proper parameter on the other candidate models? Or is there any difference on the preprocess of SGAE and other candidate method? Some of the candidate methods showed significantly poorer results compared to what was reported in corresponding paper, For example the Fig2 A.

Response: We much appreciate the reviewer for his/her careful reading. We did not perform any specific parameter tuning for the other candidate models and performed analysis using the default parameters provided by each model. It is reasonable for these methods to use the most proper results to show the performance and illustrate the study in their corresponding papers.

5. The author mainly used K-means to generate a pseudo-label when pre-clustering. While Louvain or Leiden is used to perform clustering on cell embeddings. Is there any preference of SGAE on choose the pre-cluster method and final cluster method?

Response: We much appreciate the reviewer for his/her insightful comments.

Actually, all clustering methods like Louvain, Leiden and K-means can be chosen as the clustering method. To make the parameters of application of SGAE the same, we chose K-means as the default clustering method.

6. It would be helpful to include a comprehensive hyperparameters table in order to elucidate the relative impact of each parameter on the model's performance. This table should also provide insights into the potential consequences of adjusting these parameters to higher or lower values.

Response: We sincerely thank the reviewer for his/her helpful suggestions. We have incorporated a comprehensive hyperparameters table in our Github repository (<https://github.com/STOmics/SGAE>).

7. The author claimed little batch effect detected on 3D Drosophila datasets. Is there any evidence? How would SGAE performance on multi-slice datasets with high batch effect.

Response: We sincerely appreciate the reviewer's professional comments. The incorporation of UMAP analysis supports that different slices within each stage exhibit strong mixing, indicating minimal batch effects in the 3D Drosophila datasets (see Supplementary Figure 2).

Supplementary Fig. 2

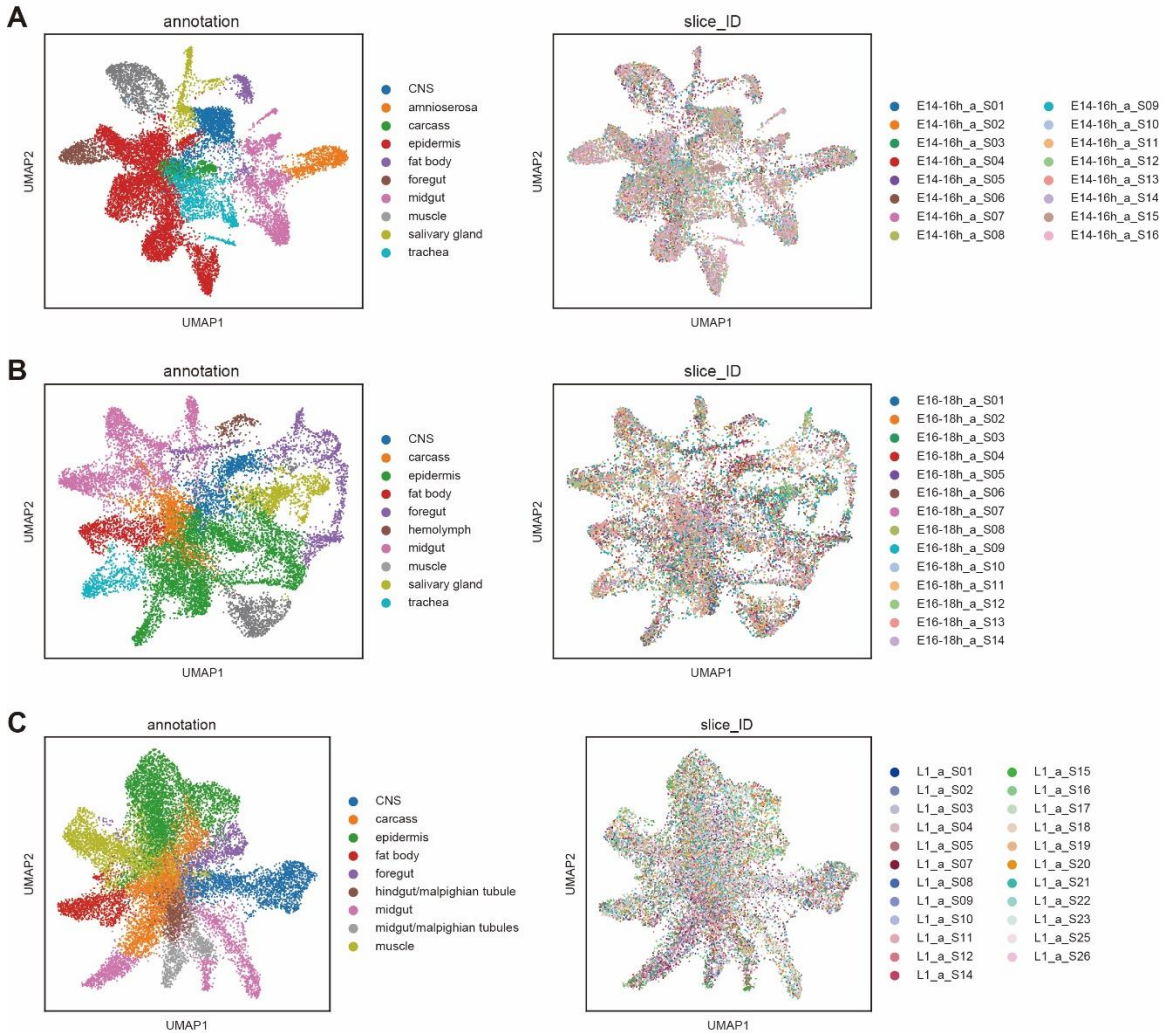

When constructing the SGAE framework, our primary focus was to achieve better ST clustering performance, without specifically considering solutions for addressing batch effects among multiple ST slices. As suggested in the discussion, if the data exhibits substantial batch effects, it would be advisable to first apply batch effect removal techniques to the datasets before utilizing SGAE for clustering analysis. This sequential approach can help mitigate the impact of batch effects and enhance the accuracy of subsequent analyses performed with SGAE.

Reviewer #3: In the manuscript entitled 'Deciphering spatial domains from spatially resolved transcriptomics with Siamese Graph Autoencoder', Cao et al developed a new computational framework for spatial domain identification in spatial transcriptomics data. The new framework (SGAE) incorporates the power of Siamese Graph Autoencoder, which mitigates the information correlation at both sample and feature levels. Through a series of benchmarking based on ST datasets generated from different platforms, the authors show that SGAE outperforms other ST clustering methods. Particularly, SGAE has shown its potential for extension and application in multi-slice 3D reconstruction and tissue structure investigation.

Overall, the manuscript describes a useful computational framework for ST data clustering and spatial domain identification. The method is sound and the manuscript is well-written.

**Response: We are incredibly appreciative of the reviewer's positive feedback on our study and we highly value their comments.**

A few points need to be addressed before publication.

1. The authors used datasets from different ST platforms and various tissues to examine the performance of SGAE and benchmark against other ST clustering methods. The ST data used in the current manuscript are all from tissues with clear structures such as the mouse cortex and human dorsolateral prefrontal cortex. However, to show the versatility of SGAE, can the authors test its performance when handling more complex and heterogeneous tissues like tumors. It would be useful to show the results.

**Response: We really thank the reviewer for his/her professional suggestions. We also assessed SGAE clustering performance over liver cancer samples (CNSA, accession code:**



CNP0002199) (see Supplementary Figure 1). The application of SGAE resulted in a clearer and more accurate identification of the margin border based on H&E staining (Supplementary Fig 1A-B). Notably, SGAE also detected clusters consisting of discrete spots located in different positions, reflecting the heterogeneous nature of the tumor tissue. To assess the spatial correlation of the clustering results, we computed the Moran's Index. The Moran's Index revealed that alternative methods tended to overutilize spatial information and identify clusters in blocks (Supplementary Fig 1C). To further evaluate the accuracy of the clustering results obtained by these tools, we focused on the rare cell type fibroblast and used VIM as a marker gene for fibroblasts. We visualized the spatial distribution of VIM and compared it with the most probable cluster identified by each of the methods. The results showed that Cluster 6 in SGAE exhibited a higher similarity to the spatial expression of VIM compared to other methods (Supplementary Fig 1D-E).

Based on the above results, we confirmed the potential of SGAE for handling more complex and heterogenous tissues.

Supplementary Fig. 1

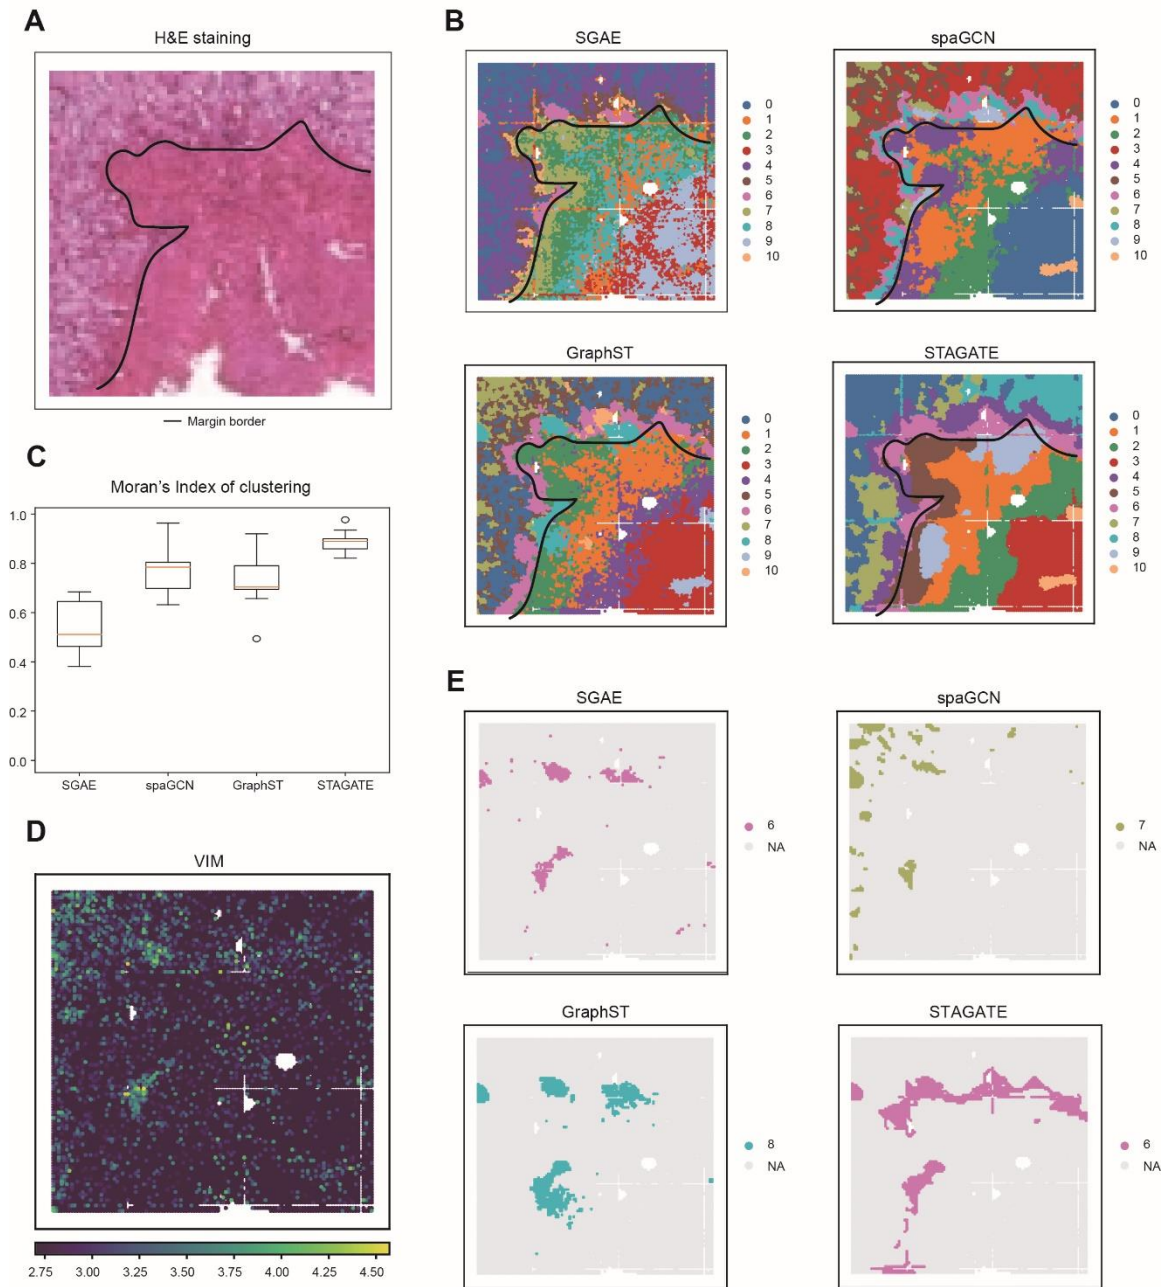

2. The authors benchmarked SGAE based on several metrics including ARI, NMI, and FMI. However, the current description of these benchmarking metrics and how exactly benchmarking has been conducted (in the method section) is rudimentary in the manuscript. More detailed information in both the **main text** and the **method section** is essential for a better understanding of the method and manuscript.

Response: We are really grateful for the reviewer's professional suggestions. We have added more benchmarking details in the revised manuscript (Line 407-423).

3. More tutorials regarding how to use SGAE need to be included on the Github page.

Response: We much appreciate the reviewer's helpful suggestion. We have incorporated a tutorial on our Github page. This tutorial aims to provide additional guidance and support to users interested in our algorithm.

4. The current resolution of all figures in the manuscript is poor, which largely influences the reading. Can authors improve the figure resolution in revision?

Response: We are thankful for the reviewer's careful reading. We have also provided figures with "vector graphic" format in our submission.
